# Supplementary material
Source: PubMed Central journal article supplement (PMC3800036)
Supplement: NIHMS500923-supplement-4.pdf [file NIHMS500923-supplement-4.pdf]

## SUPPLEMENTAL MATERIAL

## Supplemental Methods

### METHODS

#### Cardiac-targeted *Trpm7* knock out mice

All animal procedures have been reviewed and approved by the Institutional Animal Care and Use Committee at Children's Hospital Boston. Animals were housed under standard conditions and allowed access to food and water *ad libitum*. Cardiac-targeted knockout mice were generated by crossing *Trpm7<sup>fl/fl</sup>* and *Trpm7<sup>-/fl</sup>* mice described previously<sup>1</sup> with *TnT-Cre*, *Isl1-Cre* mouse lines (provided by Dr. W. Pu) and  $\alpha$ MHC-Cre (provided by Dr. M. Schneider). For simplicity, *Trpm7<sup>fl/fl</sup>* x (*TnT-Cre*) is denoted as ***Trpm7<sup>TnT/fl</sup>***, *Trpm7<sup>+/fl</sup>* x (*TnT-Cre*) as ***Trpm7<sup>TnT/+</sup>***, *Trpm7<sup>fl/fl</sup>* x (*Isl1-Cre*) as ***Trpm7<sup>Isl1/fl</sup>***, *Trpm7<sup>fl/fl</sup>* x ( $\alpha$ MHC-Cre) as ***Trpm7 <sup>$\alpha$ MHC/fl</sup>***, and *Trpm7<sup>-/fl</sup>* x ( $\alpha$ MHC-Cre) as ***Trpm7 <sup>$\alpha$ MHC/-</sup>***. Mice were maintained on 129/SvEvTac mixed genetic background. *Cre* recombinase expression and function was assessed by crossing the above cardiac *Cre* lines with *ROSA26<sup>mTmG</sup>* reporter mice<sup>2</sup> and imaging isolated cardiomyocytes using an FV1000 confocal microscope (Olympus). Mice/embryos were genotyped from tail tip or yolk sac DNA using:  $\alpha$ MHC-Cre-specific primers ( $\alpha$ MHC-Cre-F: 5'-ATG ACA GAC AGA TCC CTC CTA TCT CC-3';  $\alpha$ MHC-Cre-R: 5'-CTC ATC ACT CGT TGC ATC ATC GAC-3'), *TnT-Cre*-specific primers (*TnT-Cre*-F: 5'-GCG GGA GAA CGA GAG ATT TGG C-3'; *TnT-Cre* -R: 5'-ACG-GAC-AGA-AGC-ATT-TTC-CAG-GTA-TG-3'), *Isl1-Cre* primers (*Isl1-Cre*-F: 5'-ACT ATT TGC CAC CTA GCC ACA GCA-3'; *Isl1-Cre*-R: 5'-TCC CTG AAC ATG TCC ATC AGG TTC-3') and primers flanking Exon 17 of *Trpm7*<sup>1</sup> (M7-exon17-F: 5'-GCC ATC TCT CCT CTG GTT TT-3'; M7-exon17-R: 5'-GAT AGA CTA TAT ACT AGG TAC ATG G-3'). Transnetyx Inc performed some of the genotyping. To assess for deletion of *Trpm7* at the level of genomic DNA, DNA was isolated using Purelink Genomic DNA Mini kit (Invitrogen) and PCR performed using primers flanking Exon 17 (above).

## **Embryology**

Embryo gestational age was determined from timed matings, with noon of the day of the vaginal plug defined as day 0.5. Embryos were removed from pregnant females euthanized by cervical dislocation between E9-12. Yolk sacs were removed for genotyping (Transnetyx Inc.) and embryos were fixed in 4% formalin overnight at 4°C. Embryos were then embedded in paraffin, sectioned and stained with hematoxylin and eosin. For fluorescence imaging of *TnT-Cre/ROSA26<sup>mTmG</sup>* crosses and immunostaining of *Trpm7<sup>TnT/+</sup>* and *Trpm7<sup>TnT/fl</sup>* hearts, fixed embryos were washed with phosphate buffered saline (PBS) and then treated sequentially with 15% and 30% sucrose/PBS until the tissue was fully penetrated. They were then embedded in optimal cutting temperature (OCT) medium and snap-frozen. Cryosections (6-10 μM) were collected on microscope slides (Colorfrost Plus, Fisher) and imaged using an FV1000 confocal microscope (Olympus). For bromodeoxyuridine (BrdU) labeling, pregnant mice were injected intraperitoneally with BrdU (100 μg/g body weight) 1 h before sacrifice and embryo extraction/fixation.

## **Echocardiography**

Echocardiography was performed on conscious mice. Fur was cleared from the chest with depilatory gel and animals were restrained in a supine position on a table warmed to 37°C. Warmed gel was applied to the animal and 2D and M-mode images were recorded at the level of the papillary muscle using the Vevo 2100 equipped with either a 30 MHz or 40 MHz ultrasound probe (Visual Sonics). Electroconductive gel applied to the limbs and underlying electrode pads allowed for simultaneous ECG during the echocardiogram.

## ***In Vivo* Hemodynamics**

Mice were anesthetized with 2,2,2-tribromoethanol (250 mg/kg IP for induction with a maintenance infusion of 150 mg/kg/hour via intraperitoneal catheter using a purpose-built infusion system). Anesthetic was stored refrigerated and protected

from light until time of administration. Tracheostomy or orotracheal intubation under direct visualization was performed and mice were ventilated ( $V_T$  300  $\mu$ L, 130 breaths/minute) via a 20 gauge plastic cannula using a small animal ventilator (Harvard Apparatus) connected to humidified supplemental oxygen. Temperature of the animal was maintained at 37° for the duration of the procedure. The superior epigastric artery and vein were occluded by ligation with suture prior to surgery to maintain hemostasis. A subdiaphragmatic incision was made and hearts were accessed via diaphragmotomy. A 1.2F pressure catheter (Scisense, Inc.) was placed in the left ventricle via apical cardiac puncture. Catheter was allowed to equilibrate for 10 minutes before obtaining pressure measurements. Data was collected using Clampex 9.2 software (Axon Instruments), and analysis was performed using Microcal Origin.

### **Immunostaining ventricular myocytes and frozen embryonic sections**

Freshly dissociated ventricular myocytes in KB solution were plated on polylysine coated Colorfrost Plus microscope slides (Fisher) for 30 minutes, then fixed with 4% PFA for 20 min. Fixed embryonic cryosections were soaked for 5 minutes in PBS at RT to remove OCT. Slides were washed 3x in PBS and then permeabilized with 0.5% Triton in PBS for 10 min. For BrdU staining, embryonic cryosections were soaked in 1% Triton in 2M HCl for 1 h. After washing 3x in PBS, slides were blocked in 10% goat serum for 20 min, then incubated overnight at 4°C in rabbit anti-Troponin-I polyclonal antibody (Santa Cruz, 1:1000 of 200  $\mu$ g/ml) in 10% goat serum.

Embryonic cryosections were incubated overnight at 4°C in rabbit anti-Troponin-I polyclonal antibody (Santa Cruz, 1:1000 of 200  $\mu$ g/ml) and rat anti-BrdU monoclonal antibody (Abcam 1:1000 of 1 mg/ml) in 10% goat serum. After 3x PBS wash, slides were incubated for 1-2 h at RT with Alexa Fluor 546 goat anti-rabbit secondary antibody, and stained with DAPI. Slides were then mounted with coverslips and imaged using an FV1000 confocal microscope (Olympus).

Quantification of adult ventricular myocyte dimensions and surface area, as well as

embryonic myocardium wall thickness was performed using analysis software included with the FV1000 confocal microscope.

### **Apoptosis Assay**

Frozen embryo sections were washed for 30 minutes in PBS and permeabilized for 15 minutes in a solution of 0.1% Triton X and 0.1M Sodium Citrate. A terminal deoxynucleotidyl transferase dUTP nick end labeling (TUNEL)-based cell death assay was used to label apoptotic cells (Roche Applied Science). Samples for positive control were incubated with DNase I (400 U/mL; New England Biolabs) at 37 °C for 30 minutes before TUNEL labeling. For internal positive control, samples were examined for apoptosis in the region of the rostral neural tube. Epifluorescence images were obtained on an Eclipse 90i microscope (Nikon) using a Photometrics CoolSnapHQ2 CCD camera. Data was analyzed using ImageJ.

### **Electrocardiography (ECG)**

ECGs were performed in supine mice sedated using Avertin anesthesia. Dissection pins were placed subcutaneously in the right arm and left leg. The ECG signal was amplified using a speaker amplifier/mixer and then digitized using a Digidata 1320 board (Molecular Devices) acquired with Clampex (pClamp9, Molecular Devices) and analyzed with Clampfit (Molecular Devices) and Origin software (OriginLab Corporation, Northampton, MA).

### **Ventricular cardiomyocyte isolation**

Hearts were excised from Avertin-anesthetized, heparin-anticoagulated mice and aortas cannulated with an 18-gauge needle connected to a peristaltic pump. Hearts were then retrograde perfused for 8-10 minutes at a perfusion pressure of 70-100 mm Hg with either a solution of 0.066 mg/ml Liberase Blendzyme (Roche Diagnostics) or a mixture of 0.4 mg/ml Collagenase B (Roche), 0.3 mg/ml Collagenase D (Roche) and 0.025-0.05 mg/ml Protease XVI (Sigma), in nominally calcium-free Tyrode's solution (in mM: 140 NaCl, 5.4 KCl, 10 HEPES, 10 Glucose, 1 MgCl<sub>2</sub>, pH 7.4 with NaOH) warmed to 36° C. Following digestion, hearts were

perfused with high  $[K^+]$  solution (KB, in mM: 120  $K^+$  glutamate, 20 KCl, 10 HEPES, 1  $MgCl_2$  and 0.3 EGTA, 10 Glucose; pH 7.4 with KOH), minced with scissors, suspended in KB solution by gentle pipetting and filtered with a >100 micron mesh cell strainer. Freshly dissociated cardiomyocytes were then used for electrophysiological studies within 6-8 h.

### **Atrioventricular node cell isolation**

Hearts were excised from Avertin-anesthetized, heparin-anticoagulated mice and atrioventricular node (AVN) micro-dissected and AVN cells isolated as previously described<sup>3</sup>. Briefly, the dissected AVN was washed in 2.5 ml nominally  $Ca^{2+}/Mg^{2+}$  free Tyrode's solution (pH 6.9) for 4 minutes x 3. The AVN tissue was then transferred to 5 ml of low  $Ca^{2+}$ /low  $Mg^{2+}$  Tyrode's solution with added  $CaCl_2$  0.066 mM, Glucose 18.5 mM, BSA 1mg/ml, and taurine 50 mM, 1.2 mg elastase (Worthington) and 150  $\mu$ l Liberase TH Research Grade (Roche) and incubated at 37°C for 20-30 min. The tissue was transferred to 2.5 ml KB solution and washed 4x. AVN cells were then dispersed by triturating for 1 min in KB and then readapted to  $Ca^{2+}$  over 15 minutes by addition of Tyrode's solution with 1.8 mM  $CaCl_2$ .

### **Cellular Electrophysiology**

TRPM7 current was measured in isolated cardiomyocytes in the whole-cell configuration as previously described<sup>1</sup>. Extracellular solution composition was (in mM): 135 NaCl, 5.4 CsCl, 10 HEPES, 10 Glucose, 0.1  $CdCl_2$  and 1  $CaCl_2$ ; pH 4.0 to 7.4 with NaOH. To measure  $Mg^{2+}$ -inhibited current, 10 mM  $MgCl_2$  was added to the solution and perfused onto cells. Pipette solution composition (in mM): 120 L-aspartic acid, 20 CsCl, 2.5 EGTA or BAPTA, 2.5 EDTA, 10 HEPES, 120 CsOH, 5  $Na_2ATP$ , 0.5  $Na_2GTP$ ; pH 7.2 in CsOH. The voltage protocol (shown in figure insets) held the myocytes at 0 mV, stepped to +100 mV for 40 ms and then ramped down to -80 mV over 500 ms, holding at -80 mV for 40 ms before stepping back up to 0 mV. This protocol was repeated every 4-6 s and recordings continued for 10-15 min per cell until a steady-state TRPM7 current was obtained. For EDTA-AM experiments,

myocytes were loaded with 30  $\mu$ M EDTA-AM (Invitrogen, custom synthesis) for 30 min in KB solution prior to electrophysiological recording. For measurement of action potentials and potassium currents the extracellular solution composition was (in mM): 140 NaCl, 4 KCl, 10 HEPES, 10 Glucose, 1.2 CaCl<sub>2</sub>; pH 4.0 to 7.4 with NaOH. Pipette solution composition (in mM): 120 potassium aspartate, 20 KCl, 5 EGTA, 10 HEPES, 1 MgCl<sub>2</sub>, 5 MgATP, pH 7.2 in KOH. After establishing whole-cell configuration, cell capacitance transients were recorded by applying 40 ms voltage steps from 0 mV to 10 mV, and cell capacitance was calculated offline. Action potentials were recorded in current-clamp mode at 23°C in response to 2 ms, 5-7 mV stimulus steps at a frequency of 0.17-0.25 Hz. Action potential durations (APD) are reported in ms at 30%, 50%, 70% and 90% repolarization and measured from the peak of the action potential to X% repolarization. After recording action potentials, voltage-clamp mode was re-established and potassium currents measured. The voltage protocols (shown in Figure 6) held myocytes at -80 mV, stepped to -40 mV for 50 ms to inactivate voltage-gated sodium channels, then stepped to +60 mV for 2.5 s to activate voltage-gated potassium currents. The transient outward current ( $I_{to}$ ) was defined at the peak current ( $I_{peak}$ ) minus the sustained current ( $I_{sus}$ ) after 2.5 s, and would include both fast ( $I_{to, fast}$ ) and slow ( $I_{to, slow}$ ) components of ( $I_{to}$ )<sup>4</sup>. For measuring the 'funny' current in AVN cells,  $I_f$ , the extracellular solution was standard Tyrode's solution with 2 mM BaCl<sub>2</sub> added to block  $I_{K1}$ : (in mM) 140 NaCl, 4 KCl, 10 HEPES, 10 Glucose, 1.2 CaCl<sub>2</sub>; pH 4.0 to 7.4 with NaOH. The pipette solution contained (in mM): 135 KCl, 1 MgCl<sub>2</sub>, 0.1 CaCl<sub>2</sub>, 10 EGTA, 10 HEPES, 5 MgATP, 0.3 NaGTP, 6.6 phosphocreatine, pH 7.2 with KOH. All currents were recorded using an Axopatch 200B amplifier (Molecular Devices), acquired with Clampex (pClamp9, Molecular Devices) and analyzed with Origin software (OriginLab Corporation, Northampton, MA). Signals were low-pass filtered at 5 kHz and sampled at 10 kHz.

| Supplemental Table 1: Ventricular morphometry and function |                 |                                                   |
|------------------------------------------------------------|-----------------|---------------------------------------------------|
| Ventricular Morphometry                                    |                 |                                                   |
|                                                            | <i>WT</i>       | <i>Trpm7</i> <sup><math>\alpha</math>MHC/fl</sup> |
| HW:BW ratio (mg/g)                                         | 6.0 $\pm$ 0.3   | 7.2 $\pm$ 0.7                                     |
| n                                                          | 15              | 5                                                 |
| Conscious Transthoracic Echocardiographic Parameters       |                 |                                                   |
|                                                            | <i>WT</i>       | <i>Trpm7</i> <sup><math>\alpha</math>MHC/fl</sup> |
| Interventricular septum diameter (mm)                      | 0.91 $\pm$ 0.04 | 0.94 $\pm$ 0.04                                   |
| Posterior wall (mm)                                        | 0.80 $\pm$ 0.06 | 0.83 $\pm$ 0.03                                   |
| Left ventricle (LV) in diastole, d (mm)                    | 3.18 $\pm$ 0.13 | 3.24 $\pm$ 0.09                                   |
| Fractional shortening (%)                                  | 54.4 $\pm$ 4.1  | 48.1 $\pm$ 2.4                                    |
| Heart Rate (bpm)                                           | 515 $\pm$ 23    | 531 $\pm$ 12                                      |
| n                                                          | 9               | 20                                                |
| Sedated Left Ventricular Invasive Hemodynamic Parameters   |                 |                                                   |
|                                                            | <i>WT</i>       | <i>Trpm7</i> <sup><math>\alpha</math>MHC/fl</sup> |
| LVP <sub>max</sub> (mmHg)                                  | 86.3 $\pm$ 5.1  | 83.6 $\pm$ 3.0                                    |
| LVEDP (mmHg)                                               | 2.5 $\pm$ 0.7   | 2.6 $\pm$ 0.6                                     |
| LVDP (mmHg)                                                | 83.8 $\pm$ 4.7  | 81.0 $\pm$ 2.7                                    |
| LV dP/dt <sub>Max</sub> (mmHg/s)                           | 5946 $\pm$ 387  | 6137 $\pm$ 677                                    |
| LV dP/dt <sub>Min</sub> (mmHg/s)                           | -6489 $\pm$ 720 | -6063 $\pm$ 588                                   |
| Heart Rate (bpm)                                           | 546 $\pm$ 18    | 555 $\pm$ 30                                      |
| n                                                          | 5               | 5                                                 |

**Supplemental Table 1: Ventricular morphometry and function of *WT* and *Trpm7* <sup>$\alpha$ MHC/fl</sup> mice**

Heart weight (HW) to body weight (BW) ratio, Conscious-restrained transthoracic echocardiographic parameters and sedated invasive left ventricular invasive hemodynamic parameters. LVP<sub>max</sub>: peak left ventricular pressure. LVEDP: left ventricular end-diastolic pressure. LVDP: left ventricular developed pressure. LV dP/dt<sub>Max</sub>: maximum rate of LV pressure development over time. LV dP/dt<sub>Min</sub>: maximum rate of LV pressure relaxation over time.



**Supplemental Table 2. Differentially expressed genes from microarray analysis (> 1.3-fold change, p < 0.05)**

| ID       | Fold Change | Ave Expr | Pvalue   | adj Pvalue | B      | Symbol       | Name                                                                                                                                                                                                            |
|----------|-------------|----------|----------|------------|--------|--------------|-----------------------------------------------------------------------------------------------------------------------------------------------------------------------------------------------------------------|
| 10492021 | 7.289       | 10.403   | 9.08E-08 | 1.86E-04   | 8.297  | Postn        | periostin, osteoblast specific factor<br>similar to ribosomal protein S13; predicted gene 12270;<br>predicted gene 6834; predicted gene 15483; predicted gene 6573; ribosomal protein S13; predicted gene 10159 |
| 10565434 | 6.705       | 5.905    | 1.77E-06 | 9.61E-04   | 5.697  | Rps13        | peptidase domain containing associated with muscle regeneration                                                                                                                                                 |
| 10474129 | 5.951       | 6.954    | 6.22E-09 | 5.17E-05   | 10.284 | Pamr1        | 1                                                                                                                                                                                                               |
| 10411082 | 5.659       | 8.947    | 7.45E-05 | 6.34E-03   | 2.049  | Thbs4        | thrombospondin 4                                                                                                                                                                                                |
| 10485711 | 5.398       | 7.426    | 9.97E-06 | 2.19E-03   | 4.05   | Fibin        | fin bud initiation factor homolog (zebrafish)                                                                                                                                                                   |
| 10492798 | 5.281       | 8.079    | 1.10E-06 | 6.82E-04   | 6.139  | Sfrp2        | secreted frizzled-related protein 2                                                                                                                                                                             |
| 10518526 | 5.157       | 7.63     | 1.58E-04 | 9.25E-03   | 1.285  | Angptl7      | angiopoietin-like 7                                                                                                                                                                                             |
| 10349968 | 5.091       | 7.036    | 6.85E-06 | 1.75E-03   | 4.414  | Chi3l1       | chitinase 3-like 1                                                                                                                                                                                              |
| 10440091 | 5.007       | 8.835    | 3.56E-08 | 1.03E-04   | 9.035  | Col8a1       | collagen, type VIII, alpha 1                                                                                                                                                                                    |
| 10417212 | 4.833       | 8.043    | 2.37E-07 | 3.55E-04   | 7.499  | Itgbl1       | integrin, beta-like 1                                                                                                                                                                                           |
| 10574023 | 4.305       | 11.485   | 6.89E-09 | 5.17E-05   | 10.216 | Mt2          | metallothionein 2                                                                                                                                                                                               |
| 10541496 | 4.264       | 9.903    | 4.51E-08 | 1.21E-04   | 8.853  | Mfap5        | microfibrillar associated protein 5<br>low density lipoprotein receptor-related protein 8, apolipoprotein e receptor                                                                                            |
| 10506714 | 4.207       | 7.058    | 3.14E-05 | 3.84E-03   | 2.918  | Lrp8         | tissue inhibitor of metalloproteinase 1                                                                                                                                                                         |
| 10598976 | 4.126       | 7.73     | 3.02E-05 | 3.82E-03   | 2.955  | Timp1        | zinc finger, DHHC domain containing 2                                                                                                                                                                           |
| 10571399 | 4.115       | 7.682    | 8.71E-06 | 2.03E-03   | 4.182  | Zdhhc2       | growth differentiation factor 2                                                                                                                                                                                 |
| 10598085 | 4.079       | 6.04     | 7.04E-05 | 6.12E-03   | 2.106  | Gdf2/BMP9    | ADAMTS-like 2                                                                                                                                                                                                   |
| 10470392 | 4.068       | 8.003    | 3.12E-07 | 3.62E-04   | 7.26   | Adamtsl2     | asporin                                                                                                                                                                                                         |
| 10405047 | 4.019       | 9.827    | 6.15E-06 | 1.66E-03   | 4.518  | Aspn         | dickkopf homolog 3 ( <i>Xenopus laevis</i> )                                                                                                                                                                    |
| 10567010 | 3.896       | 7.202    | 6.46E-09 | 5.17E-05   | 10.258 | Dkk3         | solute carrier family 9 (sodium/hydrogen exchanger), member 3                                                                                                                                                   |
| 10406176 | 3.862       | 5.936    | 8.86E-07 | 6.26E-04   | 6.335  | Slc9a3       | ENSMUSG00000064352                                                                                                                                                                                              |
| 10598083 | 3.621       | 9.798    | 6.63E-05 | 5.90E-03   | 2.166  | LOC100504272 | NADPH oxidase 4                                                                                                                                                                                                 |
| 10554752 | 3.609       | 6.025    | 1.89E-05 | 2.95E-03   | 3.419  | Nox4         | similar to Unknown (protein for IMAGE:4910858); predicted gene 4076                                                                                                                                             |
| 10598087 | 3.605       | 6.484    | 1.28E-03 | 3.17E-02   | -0.86  | ND6          | pterin 4 alpha carbinolamine dehydratase/dimerization cofactor of hepatocyte nuclear factor 1 alpha (TCF1) 1                                                                                                    |
| 10363455 | 3.57        | 7.266    | 6.11E-06 | 1.66E-03   | 4.525  | Pcbd1        | cartilage intermediate layer protein, nucleotide pyrophosphohydrolase                                                                                                                                           |
| 10586357 | 3.494       | 6.813    | 1.02E-07 | 1.96E-04   | 8.205  | Cilp         | glutamate receptor, ionotropic, AMPA3 (alpha 3)                                                                                                                                                                 |
| 10599348 | 3.493       | 6.744    | 6.28E-07 | 5.45E-04   | 6.645  | Gria3        | actin, alpha 1, skeletal muscle                                                                                                                                                                                 |
| 10582592 | 3.432       | 11.651   | 5.08E-07 | 4.88E-04   | 6.833  | Acta1        | microfibrillar-associated protein 4                                                                                                                                                                             |
| 10376778 | 3.423       | 9.286    | 5.32E-06 | 1.56E-03   | 4.658  | Mfap4        | leprecan-like 1                                                                                                                                                                                                 |
| 10438753 | 3.408       | 8.409    | 7.70E-08 | 1.67E-04   | 8.43   | Leprel1      | alpha-2-HS-glycoprotein                                                                                                                                                                                         |
| 10434689 | 3.252       | 6.876    | 1.67E-05 | 2.74E-03   | 3.544  | Ahsg         | myosin, light polypeptide 4                                                                                                                                                                                     |
| 10381798 | 3.228       | 9.437    | 2.66E-04 | 1.26E-02   | 0.755  | Myl4         | neuregulin 1                                                                                                                                                                                                    |
| 10578045 | 3.187       | 6.898    | 1.80E-06 | 9.61E-04   | 5.685  | Nrg1         |                                                                                                                                                                                                                 |

|          |       |        |          |          |        |          |                                                                                                                                                                                                         |
|----------|-------|--------|----------|----------|--------|----------|---------------------------------------------------------------------------------------------------------------------------------------------------------------------------------------------------------|
| 10510265 | 3.134 | 12.925 | 3.08E-08 | 1.01E-04 | 9.144  | Nppa     | natriuretic peptide precursor type A                                                                                                                                                                    |
| 10362201 | 3.114 | 11.635 | 3.41E-07 | 3.82E-04 | 7.184  | Ctgf     | connective tissue growth factor                                                                                                                                                                         |
| 10595211 | 3.048 | 6.351  | 7.70E-05 | 6.34E-03 | 2.015  | Col12a1  | collagen, type XII, alpha 1                                                                                                                                                                             |
| 10604853 | 3.041 | 7.301  | 1.74E-06 | 9.61E-04 | 5.716  | Slitrk4  | SLIT and NTRK-like family, member 4                                                                                                                                                                     |
| 10360235 | 3.005 | 9.998  | 1.17E-04 | 7.87E-03 | 1.592  | Casq1    | calsequestrin 1                                                                                                                                                                                         |
| 10534343 | 2.928 | 8.787  | 1.89E-04 | 1.03E-02 | 1.105  | Eln      | elastin                                                                                                                                                                                                 |
| 10573979 | 2.915 | 8.978  | 7.44E-09 | 5.17E-05 | 10.164 | Gnao1    | guanine nucleotide binding protein, alpha O                                                                                                                                                             |
| 10401527 | 2.893 | 6.875  | 1.26E-05 | 2.45E-03 | 3.823  | Ltbp2    | latent transforming growth factor beta binding protein 2                                                                                                                                                |
| 10401841 | 2.843 | 6.235  | 1.34E-05 | 2.57E-03 | 3.757  | Dio2     | deiodinase, iodothyronine, type II                                                                                                                                                                      |
| 10540275 | 2.816 | 7.424  | 9.79E-07 | 6.54E-04 | 6.244  | Gxylt2   | glycosyltransferase 8 domain containing 4                                                                                                                                                               |
| 10424140 | 2.775 | 8.627  | 6.57E-08 | 1.52E-04 | 8.557  | Col14a1  | collagen, type XIV, alpha 1                                                                                                                                                                             |
| 10571715 | 2.671 | 6.792  | 2.25E-06 | 1.07E-03 | 5.475  | Enpp6    | ectonucleotide pyrophosphatase/phosphodiesterase 6                                                                                                                                                      |
| 10481627 | 2.652 | 8.248  | 2.23E-06 | 1.07E-03 | 5.484  | Lcn2     | lipocalin 2                                                                                                                                                                                             |
|          |       |        |          |          |        |          | a disintegrin-like and metallopeptidase (reprolysin type) with thrombospondin type 1 motif, 2; similar to A disintegrin-like and metallopeptidase (reprolysin type) with thrombospondin type 1 motif, 2 |
| 10375751 | 2.641 | 9.042  | 2.41E-05 | 3.39E-03 | 3.182  | Adamts2  |                                                                                                                                                                                                         |
| 10601648 | 2.641 | 5.311  | 1.66E-03 | 3.69E-02 | -1.128 | Tnmd     | tenomodulin                                                                                                                                                                                             |
| 10428698 | 2.632 | 8.96   | 8.04E-06 | 1.92E-03 | 4.259  | Sntb1    | syntrophin, basic 1                                                                                                                                                                                     |
| 10410931 | 2.628 | 8.9    | 1.72E-05 | 2.78E-03 | 3.513  | Vcan     | versican                                                                                                                                                                                                |
| 10350438 | 2.607 | 7.222  | 5.65E-08 | 1.40E-04 | 8.676  | Kcnt2    | potassium channel, subfamily T, member 2                                                                                                                                                                |
| 10360920 | 2.588 | 8.127  | 2.21E-06 | 1.07E-03 | 5.494  | Tgfb2    | transforming growth factor, beta 2                                                                                                                                                                      |
| 10469151 | 2.545 | 7.75   | 5.78E-06 | 1.62E-03 | 4.578  | Itih5    | inter-alpha (globulin) inhibitor H5                                                                                                                                                                     |
| 10449452 | 2.538 | 7.812  | 6.72E-04 | 2.19E-02 | -0.198 | Fkbp5    | FK506 binding protein 5                                                                                                                                                                                 |
| 10391504 | 2.529 | 6.824  | 5.20E-04 | 1.88E-02 | 0.066  | Meox1    | mesenchyme homeobox 1                                                                                                                                                                                   |
| 10484307 | 2.516 | 7.145  | 2.62E-08 | 1.01E-04 | 9.268  | Frzb     | frizzled-related protein                                                                                                                                                                                |
| 10458663 | 2.499 | 8.942  | 3.20E-08 | 1.01E-04 | 9.115  | Dpysl3   | dihydropyrimidinase-like 3                                                                                                                                                                              |
| 10435961 | 2.488 | 6.698  | 7.89E-06 | 1.92E-03 | 4.278  | Gm10808  | ENSMUSG00000075047                                                                                                                                                                                      |
| 10564207 | 2.477 | 7.362  | 1.57E-03 | 3.59E-02 | -1.071 | Snord116 | small nucleolar RNA, C/D box 116 cluster                                                                                                                                                                |
| 10435641 | 2.466 | 10.587 | 1.17E-05 | 2.37E-03 | 3.892  | Fstl1    | follistatin-like 1                                                                                                                                                                                      |

|          |       |        |          |          |        |         |                                                                                                                                                                                                                                                                                                                                                                                                                                                                                                                                                                                                                                                                                                                                                                                                                                                                                                                                                                                                                                                            |
|----------|-------|--------|----------|----------|--------|---------|------------------------------------------------------------------------------------------------------------------------------------------------------------------------------------------------------------------------------------------------------------------------------------------------------------------------------------------------------------------------------------------------------------------------------------------------------------------------------------------------------------------------------------------------------------------------------------------------------------------------------------------------------------------------------------------------------------------------------------------------------------------------------------------------------------------------------------------------------------------------------------------------------------------------------------------------------------------------------------------------------------------------------------------------------------|
|          |       |        |          |          |        |         | vomeronasal 2, receptor, pseudogene 44; vomeronasal 2, receptor 34; vomeronasal 2, receptor 35; vomeronasal 2, receptor 32; vomeronasal 2, receptor, pseudogene 42; vomeronasal 2, receptor 38; vomeronasal 2, receptor, pseudogene 46; vomeronasal 2, receptor 36; vomeronasal 2, receptor 37; predicted gene 3675; predicted gene 3962; predicted gene 7025; vomeronasal 2, receptor 42; vomeronasal 2, receptor 41; vomeronasal 2, receptor 40; predicted gene 5583; similar to EC2-V2R pheromone receptor; predicted gene 4033; vomeronasal 2, receptor33; predicted gene 3978; predicted gene 4073; predicted gene 3991; vomeronasal 2, receptor 48; vomeronasal 2, receptor 29; vomeronasal 2, receptor 47; predicted gene 3972; vomeronasal 2, receptor 49; vomeronasal 2, receptor 44; vomeronasal 2, receptor 43; vomeronasal 2, receptor 46; vomeronasal 2, receptor 45; vomeronasal 2, receptor 51; predicted gene 3607; predicted gene 7648; predicted gene 3956; vomeronasal 2, receptor 31; predicted gene 10302; vomeronasal 2, receptor 30 |
| 10559883 | 2.458 | 5.959  | 2.71E-03 | 4.89E-02 | -1.629 | Vmn2r39 |                                                                                                                                                                                                                                                                                                                                                                                                                                                                                                                                                                                                                                                                                                                                                                                                                                                                                                                                                                                                                                                            |
| 10351056 | 2.431 | 6.315  | 1.17E-05 | 2.37E-03 | 3.893  | Ankrd45 | ankyrin repeat domain 45                                                                                                                                                                                                                                                                                                                                                                                                                                                                                                                                                                                                                                                                                                                                                                                                                                                                                                                                                                                                                                   |
| 10363541 | 2.419 | 5.943  | 1.59E-04 | 9.26E-03 | 1.28   | Ass1    | argininosuccinate synthetase 1                                                                                                                                                                                                                                                                                                                                                                                                                                                                                                                                                                                                                                                                                                                                                                                                                                                                                                                                                                                                                             |
| 10478415 | 2.417 | 7.77   | 5.44E-06 | 1.56E-03 | 4.638  | Wisp2   | WNT1 inducible signaling pathway protein 2                                                                                                                                                                                                                                                                                                                                                                                                                                                                                                                                                                                                                                                                                                                                                                                                                                                                                                                                                                                                                 |
| 10488029 | 2.398 | 7.008  | 1.01E-04 | 7.29E-03 | 1.737  | Zfand1  | zinc finger, AN1-type domain 1                                                                                                                                                                                                                                                                                                                                                                                                                                                                                                                                                                                                                                                                                                                                                                                                                                                                                                                                                                                                                             |
| 10477920 | 2.395 | 9.957  | 1.14E-03 | 2.96E-02 | -0.737 | Myl9    | myosin, light polypeptide 9, regulatory                                                                                                                                                                                                                                                                                                                                                                                                                                                                                                                                                                                                                                                                                                                                                                                                                                                                                                                                                                                                                    |
| 10466606 | 2.383 | 7.837  | 2.24E-04 | 1.14E-02 | 0.929  | Anxa1   | annexin A1                                                                                                                                                                                                                                                                                                                                                                                                                                                                                                                                                                                                                                                                                                                                                                                                                                                                                                                                                                                                                                                 |
| 10479165 | 2.381 | 6.386  | 5.28E-04 | 1.90E-02 | 0.05   | Edn3    | endothelin 3                                                                                                                                                                                                                                                                                                                                                                                                                                                                                                                                                                                                                                                                                                                                                                                                                                                                                                                                                                                                                                               |
|          |       |        |          |          |        |         | sushi, von Willebrand factor type A, EGF and pentraxin domain containing 1                                                                                                                                                                                                                                                                                                                                                                                                                                                                                                                                                                                                                                                                                                                                                                                                                                                                                                                                                                                 |
| 10513208 | 2.37  | 8.138  | 7.24E-06 | 1.82E-03 | 4.361  | Svep1   |                                                                                                                                                                                                                                                                                                                                                                                                                                                                                                                                                                                                                                                                                                                                                                                                                                                                                                                                                                                                                                                            |
| 10433445 | 2.351 | 8.248  | 1.78E-08 | 1.01E-04 | 9.552  | Abat    | 4-aminobutyrate aminotransferase                                                                                                                                                                                                                                                                                                                                                                                                                                                                                                                                                                                                                                                                                                                                                                                                                                                                                                                                                                                                                           |
| 10349947 | 2.344 | 7.306  | 5.64E-05 | 5.30E-03 | 2.329  | Fmod    | fibromodulin                                                                                                                                                                                                                                                                                                                                                                                                                                                                                                                                                                                                                                                                                                                                                                                                                                                                                                                                                                                                                                               |
| 10485405 | 2.34  | 7.075  | 7.85E-07 | 6.06E-04 | 6.444  | Cd44    | CD44 antigen                                                                                                                                                                                                                                                                                                                                                                                                                                                                                                                                                                                                                                                                                                                                                                                                                                                                                                                                                                                                                                               |
| 10420957 | 2.338 | 7.164  | 3.48E-05 | 3.99E-03 | 2.814  | Ptk2b   | PTK2 protein tyrosine kinase 2 beta                                                                                                                                                                                                                                                                                                                                                                                                                                                                                                                                                                                                                                                                                                                                                                                                                                                                                                                                                                                                                        |
| 10399540 | 2.337 | 7.962  | 3.87E-05 | 4.25E-03 | 2.707  | Pqlc3   | PQ loop repeat containing                                                                                                                                                                                                                                                                                                                                                                                                                                                                                                                                                                                                                                                                                                                                                                                                                                                                                                                                                                                                                                  |
| 10456545 | 2.31  | 5.592  | 5.71E-06 | 1.61E-03 | 4.59   | Ccdc68  | coiled-coil domain containing 68                                                                                                                                                                                                                                                                                                                                                                                                                                                                                                                                                                                                                                                                                                                                                                                                                                                                                                                                                                                                                           |
| 10393106 | 2.31  | 7.92   | 1.21E-04 | 8.05E-03 | 1.559  | Trim47  | tripartite motif-containing 47                                                                                                                                                                                                                                                                                                                                                                                                                                                                                                                                                                                                                                                                                                                                                                                                                                                                                                                                                                                                                             |
| 10495306 | 2.303 | 6.406  | 7.58E-05 | 6.34E-03 | 2.031  | Mybphl  | myosin binding protein H-like                                                                                                                                                                                                                                                                                                                                                                                                                                                                                                                                                                                                                                                                                                                                                                                                                                                                                                                                                                                                                              |
|          |       |        |          |          |        |         | hypothetical protein LOC100046568; predicted gene 1979; predicted gene 10220; spermatogenesis associated glutamate (E)-rich protein 4d; predicted gene 7347; similar to RIKEN cDNA 5031410I06; RIKEN cDNA 5031410I06 gene; predicted gene 5862; predicted gene 7361; spermatogenesis associated                                                                                                                                                                                                                                                                                                                                                                                                                                                                                                                                                                                                                                                                                                                                                            |
| 10528804 | 2.292 | 5.694  | 6.34E-04 | 2.12E-02 | -0.138 | Gm5862  | glutamate (E)-rich protein 4a                                                                                                                                                                                                                                                                                                                                                                                                                                                                                                                                                                                                                                                                                                                                                                                                                                                                                                                                                                                                                              |
| 10467191 | 2.287 | 12.59  | 4.75E-07 | 4.72E-04 | 6.892  | Ankrd1  | ankyrin repeat domain 1 (cardiac muscle)                                                                                                                                                                                                                                                                                                                                                                                                                                                                                                                                                                                                                                                                                                                                                                                                                                                                                                                                                                                                                   |
| 10436623 | 2.278 | 5.193  | 2.26E-05 | 3.27E-03 | 3.246  | Chodl   | chondrolectin                                                                                                                                                                                                                                                                                                                                                                                                                                                                                                                                                                                                                                                                                                                                                                                                                                                                                                                                                                                                                                              |
| 10510260 | 2.269 | 11.537 | 9.45E-05 | 7.10E-03 | 1.808  | Nppb    | natriuretic peptide precursor type B                                                                                                                                                                                                                                                                                                                                                                                                                                                                                                                                                                                                                                                                                                                                                                                                                                                                                                                                                                                                                       |
| 10354309 | 2.263 | 6.902  | 3.03E-06 | 1.24E-03 | 5.196  | Col5a2  | collagen, type V, alpha 2                                                                                                                                                                                                                                                                                                                                                                                                                                                                                                                                                                                                                                                                                                                                                                                                                                                                                                                                                                                                                                  |

|          |       |        |          |          |        |               |                                                                                                 |
|----------|-------|--------|----------|----------|--------|---------------|-------------------------------------------------------------------------------------------------|
| 10355403 | 2.26  | 9.729  | 6.46E-05 | 5.77E-03 | 2.192  | Fn1           | fibronectin 1                                                                                   |
| 10375956 | 2.251 | 6.946  | 2.13E-05 | 3.17E-03 | 3.303  | Fstl4         | follicle-stimulating-like 4                                                                     |
| 10556528 | 2.241 | 6.597  | 1.41E-04 | 8.67E-03 | 1.401  | Pde3b         | similar to phosphodiesterase 3B; phosphodiesterase 3B, cGMP-inhibited                           |
| 10380419 | 2.21  | 9.329  | 2.12E-04 | 1.11E-02 | 0.984  | Col1a1        | collagen, type I, alpha 1                                                                       |
| 10358339 | 2.204 | 10.697 | 1.01E-06 | 6.63E-04 | 6.215  | Cfh           | complement component factor h; similar to complement component factor H                         |
| 10478048 | 2.204 | 7.898  | 7.36E-07 | 5.81E-04 | 6.503  | Lbp           | lipopolysaccharide binding protein                                                              |
| 10453057 | 2.192 | 6.66   | 6.44E-06 | 1.70E-03 | 4.475  | Cyp1b1        | cytochrome P450, family 1, subfamily b, polypeptide 1                                           |
| 10381962 | 2.185 | 9.236  | 3.13E-04 | 1.40E-02 | 0.585  | Ace           | angiotensin I converting enzyme (peptidyl-dipeptidase A) 1                                      |
| 10448182 | 2.142 | 8.487  | 3.51E-05 | 4.00E-03 | 2.805  | ---           | ENSMUSG00000076137                                                                              |
| 10598077 | 2.129 | 10.269 | 2.13E-03 | 4.24E-02 | -1.383 | ---           | ENSMUSG00000064350                                                                              |
| 10489878 | 2.123 | 8.506  | 4.00E-06 | 1.41E-03 | 4.931  | Ptgis         | prostaglandin I2 (prostacyclin) synthase                                                        |
| 10514088 | 2.111 | 5.497  | 5.37E-06 | 1.56E-03 | 4.648  | Frem1         | Fras1 related extracellular matrix protein 1                                                    |
| 10473494 | 2.096 | 7.181  | 8.57E-04 | 2.54E-02 | -0.448 | Olfir1034     | olfactory receptor 1034                                                                         |
| 10555389 | 2.083 | 10.544 | 8.02E-07 | 6.06E-04 | 6.425  | Ucp2          | uncoupling protein 2 (mitochondrial, proton carrier)                                            |
| 10517677 | 2.081 | 7.903  | 1.71E-07 | 2.97E-04 | 7.775  | Nbl1          | neuroblastoma, suppression of tumorigenicity 1                                                  |
| 10572378 | 2.076 | 6.449  | 8.24E-04 | 2.49E-02 | -0.408 | Comp          | cartilage oligomeric matrix protein                                                             |
| 10519983 | 2.075 | 9.598  | 6.12E-05 | 5.64E-03 | 2.248  | Fgl2          | fibrinogen-like protein 2                                                                       |
| 10494655 | 2.073 | 7.047  | 4.01E-04 | 1.63E-02 | 0.332  | Zfp697        | zinc finger protein 697                                                                         |
| 10478949 | 2.05  | 5.686  | 1.62E-03 | 3.63E-02 | -1.102 | Dok5          | docking protein 5                                                                               |
| 10435948 | 2.047 | 10.723 | 4.62E-05 | 4.71E-03 | 2.53   | Ccdc80        | coiled-coil domain containing 80                                                                |
| 10456492 | 2.042 | 8.565  | 2.13E-07 | 3.37E-04 | 7.588  | D18Ertd653e   | DNA segment, Chr 18, ERATO Doi 653, expressed                                                   |
| 10407792 | 2.035 | 6.578  | 1.39E-05 | 2.61E-03 | 3.724  | Gpr137b-ps    | similar to Gpr137b protein; G protein-coupled receptor 137B                                     |
| 10536220 | 2.027 | 9.414  | 6.30E-05 | 5.71E-03 | 2.219  | Col1a2        | collagen, type I, alpha 2                                                                       |
| 10542885 | 2.015 | 8.242  | 2.77E-05 | 3.64E-03 | 3.043  | 2810474O19Rik | RIKEN cDNA 2810474O19 gene                                                                      |
| 10605711 | 2.008 | 6.851  | 9.90E-06 | 2.19E-03 | 4.057  | Pdk3          | pyruvate dehydrogenase kinase, isoenzyme 3                                                      |
| 10598073 | 2.007 | 11.129 | 4.38E-05 | 4.58E-03 | 2.584  | ---           | ENSMUSG00000064343                                                                              |
| 10447056 | 1.998 | 6.499  | 1.98E-07 | 3.27E-04 | 7.652  | Qpct          | glutamyl-peptide cyclotransferase (glutamyl cyclase)                                            |
| 10415806 | 1.997 | 7.629  | 3.05E-05 | 3.82E-03 | 2.947  | Fam124a       | family with sequence similarity 124, member A                                                   |
| 10368289 | 1.985 | 8.946  | 2.87E-07 | 3.58E-04 | 7.332  | Enpp1         | ectonucleotide pyrophosphatase/phosphodiesterase 1                                              |
| 10416215 | 1.981 | 8      | 4.34E-05 | 4.56E-03 | 2.592  | Loxl2         | lysyl oxidase-like 2                                                                            |
| 10595404 | 1.973 | 9.016  | 2.58E-04 | 1.24E-02 | 0.786  | Fam46a        | family with sequence similarity 46, member A                                                    |
| 10441610 | 1.973 | 8.405  | 3.46E-05 | 3.99E-03 | 2.82   | Rsph3b        | similar to Unknown (protein for MGC:117841); radial spokehead-like 2A; radial spokehead-like 2B |
| 10492682 | 1.972 | 10.065 | 3.17E-04 | 1.40E-02 | 0.574  | Fam198b       | RIKEN cDNA 1110032E23 gene                                                                      |
| 10475314 | 1.972 | 6.286  | 2.82E-04 | 1.30E-02 | 0.692  | Mtap1a        | microtubule-associated protein 1 A                                                              |
| 10344990 | 1.965 | 6.425  | 2.55E-06 | 1.11E-03 | 5.359  | Crispld1      | cysteine-rich secretory protein LCCL domain containing 1                                        |
| 10494262 | 1.961 | 6.93   | 1.94E-05 | 2.98E-03 | 3.395  | Ctsk          | cathepsin K                                                                                     |
| 10544036 | 1.959 | 5.399  | 2.26E-05 | 3.27E-03 | 3.244  | Atp6v0a4      | ATPase, H+ transporting, lysosomal V0 subunit A4                                                |
| 10571467 | 1.959 | 6.446  | 5.80E-05 | 5.39E-03 | 2.302  | Pdgfrl        | platelet-derived growth factor receptor-like                                                    |
| 10344897 | 1.952 | 8.414  | 1.06E-05 | 2.24E-03 | 3.992  | Sulf1         | sulfatase 1                                                                                     |
| 10430358 | 1.945 | 6.589  | 1.75E-03 | 3.80E-02 | -1.183 | C1qtnf6       | C1q and tumor necrosis factor related protein 6                                                 |
| 10503259 | 1.937 | 8.975  | 2.29E-04 | 1.15E-02 | 0.908  | Trp53inp1     | transformation related protein 53 inducible nuclear protein 1                                   |

|          |       |        |          |          |        |           |                                                                                                                                                                                                                                                                                                                                                                                                             |
|----------|-------|--------|----------|----------|--------|-----------|-------------------------------------------------------------------------------------------------------------------------------------------------------------------------------------------------------------------------------------------------------------------------------------------------------------------------------------------------------------------------------------------------------------|
| 10368638 | 1.933 | 6.997  | 9.87E-05 | 7.19E-03 | 1.763  | Fam26e    | family with sequence similarity 26, member E                                                                                                                                                                                                                                                                                                                                                                |
| 10396952 | 1.923 | 6.361  | 5.47E-06 | 1.56E-03 | 4.632  | Ttc9      | tetratricopeptide repeat domain 9                                                                                                                                                                                                                                                                                                                                                                           |
| 10600169 | 1.919 | 12.082 | 3.70E-07 | 4.02E-04 | 7.112  | Bgn       | biglycan<br>KDEL (Lys-Asp-Glu-Leu) endoplasmic reticulum protein retention receptor 3                                                                                                                                                                                                                                                                                                                       |
| 10425287 | 1.918 | 8.424  | 7.02E-04 | 2.25E-02 | -0.242 | Kdelr3    |                                                                                                                                                                                                                                                                                                                                                                                                             |
| 10596222 | 1.917 | 7.659  | 4.22E-06 | 1.43E-03 | 4.88   | Ccrl1     | ENSMUSG00000041748<br>proteoglycan 4 (megakaryocyte stimulating factor, articular superficial zone protein)                                                                                                                                                                                                                                                                                                 |
| 10358476 | 1.913 | 6.565  | 2.23E-03 | 4.33E-02 | -1.428 | Prg4      |                                                                                                                                                                                                                                                                                                                                                                                                             |
| 10585703 | 1.911 | 7.461  | 4.09E-05 | 4.44E-03 | 2.652  | Rpp25     | ribonuclease P 25 subunit (human)                                                                                                                                                                                                                                                                                                                                                                           |
| 10434934 | 1.898 | 8.041  | 3.60E-05 | 4.02E-03 | 2.78   | Bdh1      | 3-hydroxybutyrate dehydrogenase, type 1                                                                                                                                                                                                                                                                                                                                                                     |
| 10401673 | 1.895 | 8.928  | 4.05E-06 | 1.41E-03 | 4.92   | Tgfb3     | transforming growth factor, beta 3                                                                                                                                                                                                                                                                                                                                                                          |
| 10519140 | 1.892 | 7.118  | 2.04E-04 | 1.08E-02 | 1.022  | Mmp23     | matrix metalloproteinase 23                                                                                                                                                                                                                                                                                                                                                                                 |
| 10487040 | 1.884 | 9.834  | 9.35E-04 | 2.65E-02 | -0.538 | Fbn1      | fibrillin 1                                                                                                                                                                                                                                                                                                                                                                                                 |
| 10508829 | 1.878 | 6.927  | 4.15E-05 | 4.47E-03 | 2.639  | Map3k6    | mitogen-activated protein kinase kinase kinase 6                                                                                                                                                                                                                                                                                                                                                            |
| 10346015 | 1.877 | 8.981  | 7.62E-04 | 2.38E-02 | -0.327 | Col3a1    | collagen, type III, alpha 1                                                                                                                                                                                                                                                                                                                                                                                 |
| 10353775 | 1.874 | 7.473  | 9.10E-04 | 2.62E-02 | -0.51  | Bend6     | BEN domain containing 6                                                                                                                                                                                                                                                                                                                                                                                     |
| 10508879 | 1.872 | 7.697  | 8.01E-05 | 6.45E-03 | 1.975  | Fam46b    | family with sequence similarity 46, member B                                                                                                                                                                                                                                                                                                                                                                |
| 10562784 | 1.87  | 8.102  | 8.02E-06 | 1.92E-03 | 4.262  | Mybpc2    | myosin binding protein C, fast-type                                                                                                                                                                                                                                                                                                                                                                         |
| 10389617 | 1.869 | 8.114  | 4.32E-05 | 4.56E-03 | 2.598  | Ppm1e     | protein phosphatase 1E (PP2C domain containing)                                                                                                                                                                                                                                                                                                                                                             |
| 10351041 | 1.866 | 5.589  | 1.61E-03 | 3.63E-02 | -1.097 | ---       | ENSMUSG00000065735                                                                                                                                                                                                                                                                                                                                                                                          |
| 10388430 | 1.866 | 9.189  | 9.71E-07 | 6.54E-04 | 6.252  | Serpinf1  | serine (or cysteine) peptidase inhibitor, clade F, member 1                                                                                                                                                                                                                                                                                                                                                 |
| 10356712 | 1.855 | 5.878  | 1.24E-06 | 7.54E-04 | 6.031  | Kif1a     | kinesin family member 1A<br>procollagen-proline, 2-oxoglutarate 4-dioxygenase (proline 4-hydroxylase), alpha polypeptide III                                                                                                                                                                                                                                                                                |
| 10555323 | 1.85  | 5.876  | 1.18E-04 | 7.90E-03 | 1.587  | P4ha3     |                                                                                                                                                                                                                                                                                                                                                                                                             |
| 10543939 | 1.848 | 5.814  | 4.60E-05 | 4.70E-03 | 2.534  | Fam180a   | cDNA sequence BC064033                                                                                                                                                                                                                                                                                                                                                                                      |
| 10540085 | 1.836 | 9.522  | 3.01E-06 | 1.24E-03 | 5.203  | Fbln2     | fibulin 2                                                                                                                                                                                                                                                                                                                                                                                                   |
| 10424779 | 1.834 | 6.193  | 9.65E-04 | 2.69E-02 | -0.57  | Cks2      | similar to Cyclin-dependent kinases regulatory subunit 2 (CKS-2); CDC28 protein kinase regulatory subunit 2; predicted gene 15452 predicted gene, EG620551; predicted gene 6468; predicted gene 6502; predicted gene, EG620639; predicted gene 7918; predicted gene 6509; predicted gene, EG665031; predicted gene 6346; similar to D5Ertd577e protein; predicted gene 6348; hypothetical protein LOC632173 |
| 10522585 | 1.832 | 4.04   | 7.80E-04 | 2.41E-02 | -0.351 | LOC625240 |                                                                                                                                                                                                                                                                                                                                                                                                             |
| 10584883 | 1.825 | 9.476  | 3.88E-06 | 1.41E-03 | 4.96   | Fxyd6     | FXD domain-containing ion transport regulator 6                                                                                                                                                                                                                                                                                                                                                             |
| 10604620 | 1.818 | 7.015  | 5.71E-04 | 1.99E-02 | -0.031 | Fam122b   | family with sequence similarity 122, member B                                                                                                                                                                                                                                                                                                                                                               |
| 10567995 | 1.817 | 7.275  | 3.54E-06 | 1.35E-03 | 5.048  | Nupr1     | nuclear protein 1                                                                                                                                                                                                                                                                                                                                                                                           |
| 10405058 | 1.816 | 4.747  | 8.08E-06 | 1.92E-03 | 4.255  | Omd       | osteomodulin                                                                                                                                                                                                                                                                                                                                                                                                |
| 10492864 | 1.815 | 8.093  | 2.15E-05 | 3.18E-03 | 3.293  | Sh3d19    | SH3 domain protein D19                                                                                                                                                                                                                                                                                                                                                                                      |
| 10542355 | 1.808 | 11.249 | 5.93E-06 | 1.64E-03 | 4.554  | Emp1      | epithelial membrane protein 1                                                                                                                                                                                                                                                                                                                                                                               |
| 10475625 | 1.805 | 7.217  | 9.20E-05 | 6.97E-03 | 1.835  | Eid1      | EP300 interacting inhibitor of differentiation 1                                                                                                                                                                                                                                                                                                                                                            |
| 10587639 | 1.804 | 8.887  | 7.54E-04 | 2.37E-02 | -0.316 | Nt5e      | 5' nucleotidase, ecto                                                                                                                                                                                                                                                                                                                                                                                       |
| 10471909 | 1.801 | 10.383 | 2.64E-05 | 3.54E-03 | 3.09   | ---       | ENSMUSG00000082536                                                                                                                                                                                                                                                                                                                                                                                          |
| 10438708 | 1.801 | 7.415  | 3.57E-05 | 4.01E-03 | 2.787  | Masp1     | mannan-binding lectin serine peptidase 1                                                                                                                                                                                                                                                                                                                                                                    |
| 10403980 | 1.8   | 9.565  | 2.21E-03 | 4.32E-02 | -1.422 | Hist1h2bk | histone cluster 1, H2bb                                                                                                                                                                                                                                                                                                                                                                                     |

|          |       |        |          |          |        |           |                                                                                                                                                                                                                                                                                                                                     |
|----------|-------|--------|----------|----------|--------|-----------|-------------------------------------------------------------------------------------------------------------------------------------------------------------------------------------------------------------------------------------------------------------------------------------------------------------------------------------|
| 10357043 | 1.797 | 9.021  | 9.71E-06 | 2.16E-03 | 4.076  | Bcl2      | predicted gene 3655; B-cell leukemia/lymphoma 2                                                                                                                                                                                                                                                                                     |
| 10567297 | 1.794 | 7.648  | 1.20E-04 | 8.03E-03 | 1.564  | Itpril2   | inositol 1,4,5-triphosphate receptor interacting protein-like 2                                                                                                                                                                                                                                                                     |
| 10585976 | 1.793 | 6.929  | 8.99E-04 | 2.61E-02 | -0.498 | Myo9a     | myosin IXa                                                                                                                                                                                                                                                                                                                          |
| 10364494 | 1.787 | 7.926  | 3.57E-05 | 4.01E-03 | 2.789  | Fstl3     | follicle-stimulating-like 3                                                                                                                                                                                                                                                                                                         |
| 10467258 | 1.787 | 7.101  | 2.29E-04 | 1.15E-02 | 0.905  | Myof      | myoferlin                                                                                                                                                                                                                                                                                                                           |
| 10607116 | 1.783 | 9.14   | 3.29E-05 | 3.93E-03 | 2.869  | Ammecr1   | Alport syndrome, mental retardation, midface hypoplasia and elliptocytosis chromosomal region gene 1 homolog (human)                                                                                                                                                                                                                |
| 10466210 | 1.783 | 6.722  | 1.04E-04 | 7.41E-03 | 1.715  | Ms4a6d    | membrane-spanning 4-domains, subfamily A, member 6D                                                                                                                                                                                                                                                                                 |
| 10606989 | 1.781 | 9.527  | 2.46E-05 | 3.42E-03 | 3.161  | Tsc22d3   | TSC22 domain family, member 3                                                                                                                                                                                                                                                                                                       |
| 10473491 | 1.78  | 5.572  | 1.54E-04 | 9.14E-03 | 1.31   | Olfpr1033 | olfactory receptor 1033                                                                                                                                                                                                                                                                                                             |
| 10398075 | 1.78  | 10.241 | 1.85E-04 | 1.01E-02 | 1.123  | Serpina3n | serine (or cysteine) peptidase inhibitor, clade A, member 3N                                                                                                                                                                                                                                                                        |
| 10381603 | 1.779 | 7.519  | 4.45E-06 | 1.44E-03 | 4.83   | Fzd2      | frizzled homolog 2 (Drosophila)                                                                                                                                                                                                                                                                                                     |
| 10402783 | 1.775 | 6.352  | 1.81E-03 | 3.87E-02 | -1.218 | Ahnak2    | AHNAK nucleoprotein 2; similar to Unknown (protein for IMAGE:3599271)                                                                                                                                                                                                                                                               |
| 10462613 | 1.769 | 7.17   | 7.50E-05 | 6.34E-03 | 2.041  | Ifit2     | interferon-induced protein with tetratricopeptide repeats 2                                                                                                                                                                                                                                                                         |
| 10376885 | 1.769 | 9.664  | 3.86E-05 | 4.25E-03 | 2.71   | Snord49b  | RIKEN cDNA 2410006H16 gene                                                                                                                                                                                                                                                                                                          |
| 10543004 | 1.768 | 8.664  | 7.52E-05 | 6.34E-03 | 2.038  | Pon2      | paraoxonase 2                                                                                                                                                                                                                                                                                                                       |
| 10523451 | 1.767 | 9.126  | 2.69E-04 | 1.27E-02 | 0.742  | Anxa3     | similar to Anxa3; annexin A3                                                                                                                                                                                                                                                                                                        |
| 10437590 | 1.758 | 7.652  | 7.60E-04 | 2.38E-02 | -0.324 | Carhsp1   | calcium regulated heat stable protein 1; predicted gene 9791                                                                                                                                                                                                                                                                        |
| 10573747 | 1.755 | 7.353  | 7.45E-06 | 1.86E-03 | 4.334  | Adcy7     | adenylate cyclase 7                                                                                                                                                                                                                                                                                                                 |
| 10510167 | 1.753 | 4.826  | 1.54E-05 | 2.67E-03 | 3.625  | Gm13212   | carnitine deficiency-associated gene expressed in ventricle 3; predicted gene 7236                                                                                                                                                                                                                                                  |
| 10419261 | 1.75  | 8.567  | 3.57E-04 | 1.52E-02 | 0.453  | Bmp4      | bone morphogenetic protein 4                                                                                                                                                                                                                                                                                                        |
| 10404422 | 1.746 | 10.895 | 8.44E-06 | 1.98E-03 | 4.212  | Serpinb6b | serine (or cysteine) peptidase inhibitor, clade B, member 6b                                                                                                                                                                                                                                                                        |
| 10505517 | 1.746 | 7.904  | 4.99E-05 | 4.89E-03 | 2.453  | Tlr4      | toll-like receptor 4                                                                                                                                                                                                                                                                                                                |
| 10532741 | 1.745 | 7.868  | 1.67E-05 | 2.74E-03 | 3.543  | Tmem119   | transmembrane protein 119                                                                                                                                                                                                                                                                                                           |
| 10598075 | 1.744 | 11.29  | 1.40E-03 | 3.35E-02 | -0.951 | ---       | ENSMUSG00000064348                                                                                                                                                                                                                                                                                                                  |
| 10571601 | 1.744 | 9.621  | 2.16E-05 | 3.18E-03 | 3.291  | Pdlim3    | PDZ and LIM domain 3                                                                                                                                                                                                                                                                                                                |
| 10590031 | 1.742 | 9.526  | 1.30E-04 | 8.31E-03 | 1.488  | Itga9     | integrin alpha 9                                                                                                                                                                                                                                                                                                                    |
| 10539263 | 1.74  | 6.799  | 1.46E-03 | 3.44E-02 | -0.993 | Loxl3     | lysyl oxidase-like 3                                                                                                                                                                                                                                                                                                                |
| 10408280 | 1.738 | 6.46   | 2.73E-04 | 1.28E-02 | 0.726  | Lrrc16a   | leucine rich repeat containing 16A                                                                                                                                                                                                                                                                                                  |
| 10410547 | 1.736 | 6.12   | 5.83E-06 | 1.62E-03 | 4.571  | Nkd2      | naked cuticle 2 homolog (Drosophila)                                                                                                                                                                                                                                                                                                |
|          |       |        |          |          |        |           | predicted gene 5869; predicted gene 7161; predicted gene 7105; predicted gene 5822; similar to eukaryotic translation elongation factor 1 alpha 1; predicted gene 6192; predicted gene 6392; predicted gene 6767; predicted gene 6170; predicted gene 6548; predicted gene 6789; eukaryotic translation elongation factor 1 alpha 1 |
| 10439891 | 1.735 | 9.942  | 6.45E-06 | 1.70E-03 | 4.473  | Eef1a1    |                                                                                                                                                                                                                                                                                                                                     |
| 10399208 | 1.731 | 5.265  | 1.30E-05 | 2.51E-03 | 3.79   | Tmem196   | transmembrane protein 196                                                                                                                                                                                                                                                                                                           |
| 10434668 | 1.731 | 8.258  | 1.31E-04 | 8.35E-03 | 1.473  | Tmem97    | transmembrane protein 97; predicted gene 5809                                                                                                                                                                                                                                                                                       |
| 10467730 | 1.73  | 7.167  | 6.62E-06 | 1.72E-03 | 4.447  | Morn4     | MORN repeat containing 4                                                                                                                                                                                                                                                                                                            |
| 10358434 | 1.73  | 6.606  | 1.52E-05 | 2.67E-03 | 3.639  | Pla2g4a   | phospholipase A2, group IVA (cytosolic, calcium-dependent)                                                                                                                                                                                                                                                                          |
| 10604961 | 1.727 | 7.285  | 2.37E-05 | 3.36E-03 | 3.197  | Gabra3    | gamma-aminobutyric acid (GABA) A receptor, subunit alpha 3                                                                                                                                                                                                                                                                          |

|          |       |        |          |          |        |               |                                                                                                                                                                                                                             |
|----------|-------|--------|----------|----------|--------|---------------|-----------------------------------------------------------------------------------------------------------------------------------------------------------------------------------------------------------------------------|
| 10600324 | 1.722 | 10.433 | 1.44E-04 | 8.83E-03 | 1.378  | Rpl3l         | predicted gene 5879; similar to 60S ribosomal protein L3 (J1 protein); predicted gene 4959; predicted gene 6035; predicted gene 12816; ribosomal protein L3; predicted gene 5851; predicted gene 16468; predicted gene 5850 |
| 10416974 | 1.716 | 8.546  | 6.39E-06 | 1.70E-03 | 4.481  | Gpc6          | predicted gene 4672; glypican 6; similar to Glypican 6                                                                                                                                                                      |
| 10571840 | 1.716 | 8.369  | 1.76E-04 | 9.89E-03 | 1.175  | Hpgd          | hydroxyprostaglandin dehydrogenase 15 (NAD)                                                                                                                                                                                 |
| 10366541 | 1.715 | 11.236 | 3.36E-05 | 3.93E-03 | 2.849  | Lrrc10        | leucine rich repeat containing 10                                                                                                                                                                                           |
| 10538356 | 1.707 | 7.238  | 1.05E-05 | 2.24E-03 | 4      | Chn2          | chimerin (chimaerin) 2                                                                                                                                                                                                      |
| 10386197 | 1.705 | 5.023  | 4.34E-05 | 4.56E-03 | 2.593  | 2210407C18Rik | RIKEN cDNA 2210407C18 gene                                                                                                                                                                                                  |
| 10543145 | 1.704 | 7.727  | 5.45E-05 | 5.21E-03 | 2.363  | Thsd7a        | thrombospondin, type I, domain containing 7A                                                                                                                                                                                |
| 10519693 | 1.703 | 6.53   | 3.46E-04 | 1.50E-02 | 0.485  | Sema3d        | sema domain, immunoglobulin domain (Ig), short basic domain, secreted, (semaphorin) 3D; hypothetical protein LOC100044160                                                                                                   |
| 10354418 | 1.701 | 9.783  | 4.31E-06 | 1.43E-03 | 4.86   | Obfc2a        | oligonucleotide/oligosaccharide-binding fold containing 2A                                                                                                                                                                  |
| 10340492 | 1.701 | 6.257  | 5.64E-04 | 1.97E-02 | -0.017 | Tbl3          | transducin (beta)-like 3                                                                                                                                                                                                    |
| 10427796 | 1.7   | 8.656  | 4.56E-06 | 1.46E-03 | 4.805  | Npr3          | natriuretic peptide receptor 3                                                                                                                                                                                              |
| 10443494 | 1.7   | 8.718  | 1.07E-05 | 2.24E-03 | 3.981  | Pi16          | peptidase inhibitor 16                                                                                                                                                                                                      |
| 10366293 | 1.697 | 9.062  | 7.65E-05 | 6.34E-03 | 2.021  | Csrp2         | cysteine and glycine-rich protein 2                                                                                                                                                                                         |
| 10548879 | 1.695 | 9.675  | 2.56E-06 | 1.11E-03 | 5.355  | Mgp           | matrix Gla protein                                                                                                                                                                                                          |
| 10396936 | 1.692 | 6.621  | 4.20E-07 | 4.42E-04 | 7.002  | Smoc1         | SPARC related modular calcium binding 1                                                                                                                                                                                     |
| 10504775 | 1.686 | 8.998  | 5.37E-04 | 1.92E-02 | 0.033  | Col15a1       | collagen, type XV, alpha 1                                                                                                                                                                                                  |
| 10581266 | 1.686 | 9.571  | 2.09E-04 | 1.09E-02 | 0.999  | Tppp3         | tubulin polymerization-promoting protein family member 3                                                                                                                                                                    |
| 10579799 | 1.682 | 9.902  | 1.44E-05 | 2.64E-03 | 3.689  | Tmem184c      | transmembrane protein 184C                                                                                                                                                                                                  |
| 10371770 | 1.679 | 6.558  | 9.67E-05 | 7.13E-03 | 1.784  | Gas2l3        | similar to growth arrest-specific 2 like 3; growth arrest-specific 2 like 3                                                                                                                                                 |
| 10595402 | 1.676 | 7.372  | 1.69E-03 | 3.72E-02 | -1.147 | Fam46a        | family with sequence similarity 46, member A                                                                                                                                                                                |
| 10401244 | 1.669 | 8.678  | 9.17E-06 | 2.10E-03 | 4.131  | Actn1         | actinin, alpha 1                                                                                                                                                                                                            |
| 10393379 | 1.668 | 8.037  | 7.60E-05 | 6.34E-03 | 2.028  | Mxra7         | matrix-remodelling associated 7                                                                                                                                                                                             |
| 10366346 | 1.668 | 8.341  | 2.11E-03 | 4.21E-02 | -1.373 | Phlda1        | pleckstrin homology-like domain, family A, member 1                                                                                                                                                                         |
| 10491106 | 1.668 | 7.702  | 4.93E-06 | 1.49E-03 | 4.732  | Pld1          | phospholipase D1                                                                                                                                                                                                            |
| 10594044 | 1.666 | 9.852  | 2.57E-04 | 1.24E-02 | 0.787  | Islr          | immunoglobulin superfamily containing leucine-rich repeat                                                                                                                                                                   |
| 10453555 | 1.665 | 6.466  | 3.35E-04 | 1.46E-02 | 0.518  | 2610044O15Rik | predicted gene 1976                                                                                                                                                                                                         |
| 10388880 | 1.662 | 6.484  | 8.26E-04 | 2.49E-02 | -0.409 | Tmem97        | transmembrane protein 97; predicted gene 5809                                                                                                                                                                               |
| 10598091 | 1.661 | 9.483  | 1.67E-03 | 3.70E-02 | -1.135 | ---           | ENSMUSG00000064372                                                                                                                                                                                                          |
| 10578649 | 1.661 | 6.62   | 1.38E-04 | 8.55E-03 | 1.423  | Odz3          | odd Oz/ten-m homolog 3 (Drosophila)                                                                                                                                                                                         |
| 10350146 | 1.659 | 8.075  | 9.60E-05 | 7.10E-03 | 1.792  | Phlda3        | pleckstrin homology-like domain, family A, member 3                                                                                                                                                                         |
| 10539135 | 1.658 | 7.049  | 2.05E-04 | 1.08E-02 | 1.021  | Capg          | capping protein (actin filament), gelsolin-like                                                                                                                                                                             |
| 10594066 | 1.658 | 8.808  | 1.16E-03 | 2.99E-02 | -0.76  | Loxl1         | lysyl oxidase-like 1                                                                                                                                                                                                        |
| 10402211 | 1.657 | 8.883  | 3.61E-05 | 4.02E-03 | 2.777  | Fbln5         | fibulin 5                                                                                                                                                                                                                   |
| 10577782 | 1.657 | 8.367  | 7.28E-04 | 2.31E-02 | -0.28  | Htra4         | HtrA serine peptidase 4                                                                                                                                                                                                     |
| 10588037 | 1.654 | 7.601  | 9.59E-05 | 7.10E-03 | 1.793  | Rbp1          | retinol binding protein 1, cellular                                                                                                                                                                                         |
| 10522208 | 1.652 | 6.825  | 9.80E-05 | 7.18E-03 | 1.771  | Uchl1         | ubiquitin carboxy-terminal hydrolase L1                                                                                                                                                                                     |
| 10471154 | 1.65  | 6.883  | 8.55E-05 | 6.68E-03 | 1.909  | Ass1          | argininosuccinate synthetase 1                                                                                                                                                                                              |
| 10371082 | 1.65  | 7.203  | 5.80E-04 | 2.01E-02 | -0.046 | Itgb1bp3      | integrin beta 1 binding protein 3                                                                                                                                                                                           |
| 10590983 | 1.648 | 6.05   | 6.59E-06 | 1.72E-03 | 4.453  | Panx1         | pannexin 1                                                                                                                                                                                                                  |

|          |       |        |          |          |        |          |                                                                       |
|----------|-------|--------|----------|----------|--------|----------|-----------------------------------------------------------------------|
| 10583008 | 1.647 | 7.332  | 1.07E-03 | 2.88E-02 | -0.676 | Casp12   | caspase 12; hypothetical protein LOC100044205                         |
| 10527233 | 1.646 | 10.039 | 7.11E-07 | 5.81E-04 | 6.534  | Cyth3    | cytohesin 3                                                           |
| 10501456 | 1.646 | 7.834  | 8.74E-05 | 6.74E-03 | 1.887  | Fam102b  | family with sequence similarity 102, member B                         |
| 10555027 | 1.643 | 9.197  | 1.28E-05 | 2.48E-03 | 3.809  | Gab2     | growth factor receptor bound protein 2-associated protein 2           |
| 10352143 | 1.642 | 6.299  | 1.23E-05 | 2.45E-03 | 3.841  | Kif26b   | kinesin family member 26B                                             |
| 10392056 | 1.64  | 6.828  | 1.26E-04 | 8.23E-03 | 1.514  | Cyb561   | cytochrome b-561                                                      |
| 10387170 | 1.639 | 8.699  | 1.57E-05 | 2.67E-03 | 3.607  | Ntn1     | similar to Netrin-1 precursor; netrin 1                               |
| 10531610 | 1.639 | 7.017  | 6.40E-05 | 5.75E-03 | 2.203  | Rasgef1b | RasGEF domain family, member 1B; hypothetical protein<br>LOC100044232 |
| 10349876 | 1.638 | 8.927  | 1.77E-04 | 9.90E-03 | 1.171  | Plekha6  | pleckstrin homology domain containing, family A member 6              |



|          |       |       |          |          |        |               |                                                                                                                                                                                                                                                                                                                                                                                                                                                                                                                                                                                                                                                                                                                                                                                                                                                                                                                                                                                                                                                                                                                                                                                                                                                                                                                                                                                                                                                                                                                                                                                                                                                                                                |
|----------|-------|-------|----------|----------|--------|---------------|------------------------------------------------------------------------------------------------------------------------------------------------------------------------------------------------------------------------------------------------------------------------------------------------------------------------------------------------------------------------------------------------------------------------------------------------------------------------------------------------------------------------------------------------------------------------------------------------------------------------------------------------------------------------------------------------------------------------------------------------------------------------------------------------------------------------------------------------------------------------------------------------------------------------------------------------------------------------------------------------------------------------------------------------------------------------------------------------------------------------------------------------------------------------------------------------------------------------------------------------------------------------------------------------------------------------------------------------------------------------------------------------------------------------------------------------------------------------------------------------------------------------------------------------------------------------------------------------------------------------------------------------------------------------------------------------|
|          |       |       |          |          |        |               | ENSMUSG00000075898; ENSMUSG00000075756;<br>ENSMUSG00000075757; ENSMUSG00000075947;<br>ENSMUSG00000075800; ENSMUSG00000075801;<br>ENSMUSG00000075803; ENSMUSG00000075808;<br>ENSMUSG00000075940; ENSMUSG00000075809;<br>ENSMUSG00000075941; ENSMUSG00000075751;<br>ENSMUSG00000075805; ENSMUSG00000075944;<br>ENSMUSG00000075891; ENSMUSG00000075750;<br>ENSMUSG00000075894; ENSMUSG00000075886;<br>ENSMUSG00000077645; ENSMUSG00000075742;<br>ENSMUSG00000075884; ENSMUSG00000075743;<br>ENSMUSG00000075885; ENSMUSG00000075888;<br>ENSMUSG00000075748; ENSMUSG00000075812;<br>ENSMUSG00000075810; ENSMUSG00000075953;<br>ENSMUSG00000075819; ENSMUSG00000075950;<br>ENSMUSG00000075883; ENSMUSG00000075956;<br>ENSMUSG00000075882; ENSMUSG00000075881;<br>ENSMUSG00000075954; ENSMUSG00000075816;<br>ENSMUSG00000075734; ENSMUSG00000075733;<br>ENSMUSG00000075730; ENSMUSG00000077225;<br>ENSMUSG00000075738; ENSMUSG00000075739;<br>ENSMUSG00000075821; ENSMUSG00000075925;<br>ENSMUSG00000075823; ENSMUSG00000075926;<br>ENSMUSG00000075824; ENSMUSG00000075927;<br>ENSMUSG00000075827; ENSMUSG00000075922;<br>ENSMUSG00000075828; ENSMUSG00000075920;<br>ENSMUSG00000075726; ENSMUSG00000075721;<br>ENSMUSG00000075722; ENSMUSG00000075831;<br>ENSMUSG00000075830; ENSMUSG00000075835;<br>ENSMUSG00000075939; ENSMUSG00000075834;<br>ENSMUSG00000075935; ENSMUSG00000075932;<br>ENSMUSG00000075933; ENSMUSG00000075783;<br>ENSMUSG00000075781; ENSMUSG00000075717;<br>ENSMUSG00000075716; ENSMUSG00000075782;<br>ENSMUSG00000075901; ENSMUSG00000075715;<br>ENSMUSG00000075909; ENSMUSG00000075714;<br>ENSMUSG00000075981; ENSMUSG00000077615;<br>ENSMUSG00000075713; ENSMUSG00000075982; |
| 10564043 | 1.637 | 3.77  | 2.69E-03 | 4.88E-02 | -1.624 | ---           |                                                                                                                                                                                                                                                                                                                                                                                                                                                                                                                                                                                                                                                                                                                                                                                                                                                                                                                                                                                                                                                                                                                                                                                                                                                                                                                                                                                                                                                                                                                                                                                                                                                                                                |
| 10359034 | 1.636 | 8.449 | 1.63E-04 | 9.37E-03 | 1.256  | Qsox1         | quiescin Q6 sulfhydryl oxidase 1                                                                                                                                                                                                                                                                                                                                                                                                                                                                                                                                                                                                                                                                                                                                                                                                                                                                                                                                                                                                                                                                                                                                                                                                                                                                                                                                                                                                                                                                                                                                                                                                                                                               |
| 10523001 | 1.635 | 9.263 | 4.33E-06 | 1.43E-03 | 4.857  | Mobkl1a       | MOB1, Mps One Binder kinase activator-like 1A (yeast)                                                                                                                                                                                                                                                                                                                                                                                                                                                                                                                                                                                                                                                                                                                                                                                                                                                                                                                                                                                                                                                                                                                                                                                                                                                                                                                                                                                                                                                                                                                                                                                                                                          |
| 10405755 | 1.631 | 6.679 | 2.01E-03 | 4.12E-02 | -1.325 | ---           | ENSMUSG00000077057                                                                                                                                                                                                                                                                                                                                                                                                                                                                                                                                                                                                                                                                                                                                                                                                                                                                                                                                                                                                                                                                                                                                                                                                                                                                                                                                                                                                                                                                                                                                                                                                                                                                             |
| 10490302 | 1.631 | 6.361 | 9.19E-04 | 2.63E-02 | -0.519 | 2810021G02Rik | RIKEN cDNA 2810021G02 gene                                                                                                                                                                                                                                                                                                                                                                                                                                                                                                                                                                                                                                                                                                                                                                                                                                                                                                                                                                                                                                                                                                                                                                                                                                                                                                                                                                                                                                                                                                                                                                                                                                                                     |
| 10492558 | 1.63  | 8.319 | 2.29E-04 | 1.15E-02 | 0.907  | Smc4          | structural maintenance of chromosomes 4<br>ENSMUSG00000075724; ENSMUSG00000075725;<br>ENSMUSG00000075972; ENSMUSG00000075818;<br>ENSMUSG00000075945                                                                                                                                                                                                                                                                                                                                                                                                                                                                                                                                                                                                                                                                                                                                                                                                                                                                                                                                                                                                                                                                                                                                                                                                                                                                                                                                                                                                                                                                                                                                            |
| 10595636 | 1.628 | 8.434 | 1.19E-04 | 7.97E-03 | 1.576  | ---           |                                                                                                                                                                                                                                                                                                                                                                                                                                                                                                                                                                                                                                                                                                                                                                                                                                                                                                                                                                                                                                                                                                                                                                                                                                                                                                                                                                                                                                                                                                                                                                                                                                                                                                |

|          |       |        |          |          |        |               |                                                                                                                                                                           |
|----------|-------|--------|----------|----------|--------|---------------|---------------------------------------------------------------------------------------------------------------------------------------------------------------------------|
| 10503833 | 1.627 | 10.103 | 4.82E-06 | 1.48E-03 | 4.753  | Rplp1         | predicted gene 11942; predicted gene 13777; predicted gene 10073; ribosomal protein, large, P1                                                                            |
| 10526838 | 1.626 | 9.36   | 1.09E-03 | 2.91E-02 | -0.696 | Gm10874       | ENSMUSG00000075591                                                                                                                                                        |
| 10577190 | 1.626 | 8.683  | 1.36E-04 | 8.50E-03 | 1.438  | Rasa3         | RAS p21 protein activator 3                                                                                                                                               |
| 10571530 | 1.623 | 8.42   | 1.58E-05 | 2.67E-03 | 3.596  | Fat1          | FAT tumor suppressor homolog 1 (Drosophila)                                                                                                                               |
| 10370180 | 1.622 | 8.996  | 1.10E-04 | 7.62E-03 | 1.653  | Col6a2        | collagen, type VI, alpha 2                                                                                                                                                |
| 10527649 | 1.621 | 7.881  | 4.05E-04 | 1.64E-02 | 0.321  | 6330406I15Rik | RIKEN cDNA 6330406I15 gene                                                                                                                                                |
| 10423498 | 1.62  | 9.169  | 5.06E-06 | 1.52E-03 | 4.706  | Dap           | death-associated protein                                                                                                                                                  |
| 10556381 | 1.62  | 9.525  | 3.13E-05 | 3.84E-03 | 2.919  | Mical2        | microtubule associated monooxygenase, calponin and LIM domain containing 2                                                                                                |
| 10586744 | 1.619 | 9.458  | 6.93E-05 | 6.09E-03 | 2.121  | Anxa2         | similar to Annexin A2 (Annexin II) (Lipocortin II) (Calpactin I heavy chain) (Chromobindin-8) (p36) (Protein I) (Placental anticoagulant protein IV) (PAP-IV); annexin A2 |
| 10433114 | 1.619 | 9.354  | 8.46E-04 | 2.53E-02 | -0.434 | Itga5         | integrin alpha 5 (fibronectin receptor alpha)                                                                                                                             |
| 10475378 | 1.616 | 7.859  | 1.42E-05 | 2.62E-03 | 3.7    | Casc4         | cancer susceptibility candidate 4                                                                                                                                         |
| 10376201 | 1.615 | 11.029 | 4.76E-06 | 1.48E-03 | 4.766  | Gpx3          | glutathione peroxidase 3                                                                                                                                                  |
| 10411229 | 1.614 | 9.175  | 6.09E-05 | 5.63E-03 | 2.253  | F2r           | coagulation factor II (thrombin) receptor                                                                                                                                 |
| 10439009 | 1.613 | 7.389  | 1.31E-03 | 3.21E-02 | -0.883 | Apod          | apolipoprotein D                                                                                                                                                          |
| 10594762 | 1.611 | 8.744  | 2.11E-04 | 1.10E-02 | 0.99   | Fam81a        | family with sequence similarity 81, member A                                                                                                                              |
| 10399691 | 1.61  | 9.535  | 1.25E-04 | 8.21E-03 | 1.521  | Id2           | inhibitor of DNA binding 2                                                                                                                                                |
| 10528332 | 1.61  | 8.491  | 8.82E-05 | 6.76E-03 | 1.877  | Napepld       | N-acyl phosphatidylethanolamine phospholipase D                                                                                                                           |
| 10504817 | 1.606 | 8.316  | 4.63E-04 | 1.77E-02 | 0.186  | Tgfb1         | transforming growth factor, beta receptor I                                                                                                                               |
| 10498775 | 1.601 | 7.562  | 3.57E-04 | 1.52E-02 | 0.452  | Golim4        | golgi integral membrane protein 4                                                                                                                                         |
| 10522060 | 1.599 | 7.836  | 2.26E-04 | 1.14E-02 | 0.919  | Fam114a1      | family with sequence similarity 114, member A1                                                                                                                            |
| 10467979 | 1.594 | 8.88   | 1.57E-03 | 3.59E-02 | -1.069 | Scd1          | stearoyl-Coenzyme A desaturase 1                                                                                                                                          |
| 10523595 | 1.589 | 6.029  | 1.55E-05 | 2.67E-03 | 3.62   | Ptpn13        | protein tyrosine phosphatase, non-receptor type 13                                                                                                                        |
| 10514240 | 1.588 | 5.401  | 9.96E-04 | 2.76E-02 | -0.603 | Slc24a2       | solute carrier family 24 (sodium/potassium/calcium exchanger), member 2                                                                                                   |
| 10467470 | 1.587 | 7.525  | 4.48E-04 | 1.74E-02 | 0.218  | Aldh18a1      | aldehyde dehydrogenase 18 family, member A1                                                                                                                               |
| 10489891 | 1.583 | 8.01   | 1.13E-04 | 7.70E-03 | 1.626  | B4galt5       | UDP-Gal:betaGlcNAc beta 1,4-galactosyltransferase, polypeptide 5                                                                                                          |
| 10478572 | 1.583 | 6.211  | 4.99E-04 | 1.83E-02 | 0.107  | Ube2c         | ubiquitin-conjugating enzyme E2C; predicted gene 8956                                                                                                                     |
| 10467768 | 1.582 | 6.135  | 1.92E-03 | 4.03E-02 | -1.278 | Loxl4         | lysyl oxidase-like 4                                                                                                                                                      |
| 10534085 | 1.582 | 7.735  | 1.70E-03 | 3.72E-02 | -1.151 | Phkg1         | phosphorylase kinase gamma 1                                                                                                                                              |
| 10464761 | 1.577 | 5.249  | 5.55E-04 | 1.95E-02 | -0.001 | Syt12         | synaptotagmin XII                                                                                                                                                         |
| 10450920 | 1.575 | 8.364  | 2.48E-03 | 4.65E-02 | -1.541 | AY036118      | ENSMUSG00000045999                                                                                                                                                        |
| 10599736 | 1.574 | 11.23  | 8.19E-05 | 6.53E-03 | 1.952  | Fhl1          | four and a half LIM domains 1                                                                                                                                             |
| 10593293 | 1.574 | 8.165  | 5.65E-05 | 5.30E-03 | 2.327  | Ncam1         | neural cell adhesion molecule 1                                                                                                                                           |
| 10601854 | 1.574 | 7.036  | 1.80E-04 | 1.00E-02 | 1.154  | Wbp5          | WW domain binding protein 5                                                                                                                                               |
| 10518069 | 1.573 | 8.961  | 1.78E-05 | 2.81E-03 | 3.483  | Efh2          | similar to EF hand domain containing 2; EF hand domain containing 2                                                                                                       |
| 10427075 | 1.573 | 6.522  | 2.09E-03 | 4.19E-02 | -1.362 | Krt18         | keratin 18                                                                                                                                                                |
| 10461614 | 1.573 | 7.748  | 2.17E-03 | 4.28E-02 | -1.402 | Ms4a6c        | membrane-spanning 4-domains, subfamily A, member 6C                                                                                                                       |
| 10575799 | 1.572 | 7.409  | 2.53E-04 | 1.22E-02 | 0.806  | Plcg2         | phospholipase C, gamma 2                                                                                                                                                  |
| 10437210 | 1.571 | 7.562  | 1.67E-04 | 9.55E-03 | 1.228  | Bace2         | beta-site APP-cleaving enzyme 2                                                                                                                                           |

|          |       |        |          |          |        |               |                                                                                                                                                                                                                                                                                                                                                          |
|----------|-------|--------|----------|----------|--------|---------------|----------------------------------------------------------------------------------------------------------------------------------------------------------------------------------------------------------------------------------------------------------------------------------------------------------------------------------------------------------|
| 10601659 | 1.571 | 7.607  | 2.97E-04 | 1.35E-02 | 0.64   | Srpx2         | sushi-repeat-containing protein, X-linked 2                                                                                                                                                                                                                                                                                                              |
| 10447619 | 1.57  | 9.348  | 2.16E-04 | 1.11E-02 | 0.966  | Rsph3b        | similar to Unknown (protein for MGC:117841); radial spokehead-like 2A; radial spokehead-like 2B                                                                                                                                                                                                                                                          |
| 10459620 | 1.567 | 5.715  | 1.67E-04 | 9.55E-03 | 1.23   | Rab27b        | RAB27b, member RAS oncogene family                                                                                                                                                                                                                                                                                                                       |
| 10365983 | 1.563 | 9.809  | 1.00E-05 | 2.20E-03 | 4.043  | Lum           | lumican                                                                                                                                                                                                                                                                                                                                                  |
| 10517053 | 1.563 | 7.833  | 1.93E-03 | 4.03E-02 | -1.281 | Trnp1         | TMF1-regulated nuclear protein 1                                                                                                                                                                                                                                                                                                                         |
| 10565456 | 1.562 | 7.633  | 3.42E-04 | 1.49E-02 | 0.495  | Prss23        | protease, serine, 23                                                                                                                                                                                                                                                                                                                                     |
| 10489484 | 1.56  | 8.03   | 4.85E-05 | 4.81E-03 | 2.482  | Sdc4          | syndecan 4                                                                                                                                                                                                                                                                                                                                               |
| 10385391 | 1.557 | 8.408  | 4.42E-04 | 1.73E-02 | 0.232  | Cyfp2         | cytoplasmic FMR1 interacting protein 2                                                                                                                                                                                                                                                                                                                   |
| 10408200 | 1.557 | 6.048  | 1.54E-03 | 3.55E-02 | -1.047 | Hist1h4f      | histone cluster 1, H4k; histone cluster 1, H4m; histone cluster 4, H4; similar to germinal histone H4 gene; histone cluster 1, H4h; histone cluster 1, H4j; histone cluster 1, H4i; histone cluster 1, H4d; histone cluster 1, H4c; histone cluster 1, H4f; histone cluster 1, H4b; histone cluster 1, H4a; histone cluster 2, H4; similar to histone H4 |
| 10411519 | 1.556 | 8.422  | 6.08E-04 | 2.06E-02 | -0.096 | Mtap1b        | microtubule-associated protein 1B                                                                                                                                                                                                                                                                                                                        |
| 10522467 | 1.553 | 8.726  | 6.53E-05 | 5.82E-03 | 2.182  | Rasl11b       | RAS-like, family 11, member B                                                                                                                                                                                                                                                                                                                            |
| 10457640 | 1.553 | 9.988  | 1.27E-03 | 3.17E-02 | -0.856 | S100a11       | predicted gene 7665; S100 calcium binding protein A11 (calgizzarin); predicted gene 5068                                                                                                                                                                                                                                                                 |
| 10370210 | 1.551 | 9.304  | 1.26E-04 | 8.21E-03 | 1.518  | Col6a1        | collagen, type VI, alpha 1                                                                                                                                                                                                                                                                                                                               |
| 10452978 | 1.55  | 6.267  | 9.34E-04 | 2.65E-02 | -0.537 | Gm6548        | predicted gene 5869; predicted gene 7161; predicted gene 7105; predicted gene 5822; similar to eukaryotic translation elongation factor 1 alpha 1; predicted gene 6192; predicted gene 6392; predicted gene 6767; predicted gene 6170; predicted gene 6548; predicted gene 6789; eukaryotic translation elongation factor 1 alpha 1                      |
| 10435266 | 1.55  | 9.546  | 1.56E-05 | 2.67E-03 | 3.609  | Heg1          | ENSMUSG00000035500                                                                                                                                                                                                                                                                                                                                       |
| 10480003 | 1.548 | 5.062  | 3.06E-05 | 3.82E-03 | 2.942  | Ith2          | inter-alpha trypsin inhibitor, heavy chain 2                                                                                                                                                                                                                                                                                                             |
| 10598721 | 1.546 | 11.075 | 6.87E-04 | 2.22E-02 | -0.221 | Rpl3l         | predicted gene 5879; similar to 60S ribosomal protein L3 (J1 protein); predicted gene 4959; predicted gene 6035; predicted gene 12816; ribosomal protein L3; predicted gene 5851; predicted gene 16468; predicted gene 5850                                                                                                                              |
| 10456184 | 1.545 | 7.04   | 1.37E-04 | 8.51E-03 | 1.431  | Apcdd1        | adenomatosis polyposis coli down-regulated 1                                                                                                                                                                                                                                                                                                             |
| 10481186 | 1.543 | 6.726  | 8.25E-04 | 2.49E-02 | -0.409 | Sardh         | sarcosine dehydrogenase                                                                                                                                                                                                                                                                                                                                  |
| 10545974 | 1.541 | 8.104  | 9.27E-04 | 2.64E-02 | -0.528 | Antxr1        | anthrax toxin receptor 1                                                                                                                                                                                                                                                                                                                                 |
| 10501762 | 1.54  | 7.141  | 4.94E-04 | 1.82E-02 | 0.119  | Snx7          | sorting nexin 7                                                                                                                                                                                                                                                                                                                                          |
| 10453604 | 1.538 | 7.944  | 8.52E-04 | 2.53E-02 | -0.441 | Bambi         | BMP and activin membrane-bound inhibitor, homolog (Xenopus laevis)                                                                                                                                                                                                                                                                                       |
| 10502949 | 1.536 | 10.042 | 1.13E-03 | 2.95E-02 | -0.733 | ---           | ENSMUSG00000065463; ENSMUSG00000065738; ENSMUSG00000064731                                                                                                                                                                                                                                                                                               |
| 10492428 | 1.535 | 7.947  | 1.57E-04 | 9.23E-03 | 1.289  | 4931440P22Rik | TCDD-inducible poly(ADP-ribose) polymerase                                                                                                                                                                                                                                                                                                               |
| 10538640 | 1.535 | 7.568  | 1.04E-04 | 7.44E-03 | 1.707  | Abcg2         | ATP-binding cassette, sub-family G (WHITE), member 2                                                                                                                                                                                                                                                                                                     |
| 10493990 | 1.534 | 10.667 | 1.31E-04 | 8.35E-03 | 1.475  | S100a11       | predicted gene 7665; S100 calcium binding protein A11 (calgizzarin); predicted gene 5068                                                                                                                                                                                                                                                                 |
| 10494672 | 1.534 | 4.991  | 1.14E-04 | 7.72E-03 | 1.622  | Tbx15         | T-box 15                                                                                                                                                                                                                                                                                                                                                 |

|          |       |        |          |          |        |          |                                                                                                                                                                                                                                                                      |
|----------|-------|--------|----------|----------|--------|----------|----------------------------------------------------------------------------------------------------------------------------------------------------------------------------------------------------------------------------------------------------------------------|
| 10442219 | 1.534 | 5.552  | 5.21E-04 | 1.88E-02 | 0.064  | Zfp52    | hypothetical protein LOC100044274; zinc finger protein 52                                                                                                                                                                                                            |
| 10476106 | 1.533 | 11.791 | 1.79E-03 | 3.85E-02 | -1.207 | Snord57  | ENSMUSG00000065272                                                                                                                                                                                                                                                   |
| 10440491 | 1.532 | 10.64  | 3.02E-06 | 1.24E-03 | 5.198  | App      | amyloid beta (A4) precursor protein                                                                                                                                                                                                                                  |
| 10407319 | 1.531 | 9.991  | 2.90E-05 | 3.74E-03 | 2.994  | Gm10154  | ribosomal protein L34; predicted gene 10154; similar to                                                                                                                                                                                                              |
| 10457686 | 1.53  | 8.875  | 5.57E-05 | 5.28E-03 | 2.341  | Dsc2     | ribosomal protein L34; predicted gene 7800; predicted gene 4705                                                                                                                                                                                                      |
| 10590909 | 1.53  | 6.904  | 1.81E-04 | 1.00E-02 | 1.146  | Endod1   | desmocollin 2                                                                                                                                                                                                                                                        |
| 10407040 | 1.528 | 8.558  | 7.18E-04 | 2.29E-02 | -0.267 | Esco1    | endonuclease domain containing 1                                                                                                                                                                                                                                     |
| 10363901 | 1.527 | 7.898  | 2.19E-03 | 4.30E-02 | -1.413 | Etv5     | predicted gene 7054; establishment of cohesion 1 homolog 1 (S. cerevisiae)                                                                                                                                                                                           |
| 10561212 | 1.527 | 10.478 | 5.13E-05 | 4.96E-03 | 2.425  | Ltbp4    | ets variant gene 5                                                                                                                                                                                                                                                   |
| 10397002 | 1.526 | 7.429  | 1.83E-06 | 9.63E-04 | 5.669  | Sipa11   | latent transforming growth factor beta binding protein 4                                                                                                                                                                                                             |
| 10421924 | 1.523 | 6.844  | 6.82E-05 | 6.00E-03 | 2.138  | Pcdh9    | signal-induced proliferation-associated 1 like 1                                                                                                                                                                                                                     |
| 10502196 | 1.523 | 9.309  | 1.24E-03 | 3.11E-02 | -0.83  | Rpl34    | protocadherin 9                                                                                                                                                                                                                                                      |
| 10369388 | 1.523 | 7.62   | 3.53E-05 | 4.00E-03 | 2.799  | Unc5b    | ribosomal protein L34; predicted gene 10154; similar to                                                                                                                                                                                                              |
| 10360764 | 1.522 | 10.3   | 1.05E-04 | 7.45E-03 | 1.703  | Enah     | ribosomal protein L34; predicted gene 7800; predicted gene 4705                                                                                                                                                                                                      |
| 10439710 | 1.522 | 8.622  | 3.48E-06 | 1.35E-03 | 5.064  | Phldb2   | unc-5 homolog B (C. elegans)                                                                                                                                                                                                                                         |
| 10582275 | 1.522 | 7.566  | 1.54E-04 | 9.14E-03 | 1.313  | Slc7a5   | enabled homolog (Drosophila)                                                                                                                                                                                                                                         |
| 10374908 | 1.521 | 7.857  | 8.65E-04 | 2.56E-02 | -0.458 | Rtn4     | pleckstrin homology-like domain, family B, member 2                                                                                                                                                                                                                  |
| 10587880 | 1.52  | 9.34   | 2.56E-05 | 3.51E-03 | 3.12   | Pcolce2  | similar to solute carrier family 7 (cationic amino acid transporter, y+ system), member 5; similar to Solute carrier family 7 (cationic amino acid transporter, y+ system), member 5; solute carrier family 7 (cationic amino acid transporter, y+ system), member 5 |
| 10490159 | 1.52  | 9.517  | 1.11E-05 | 2.29E-03 | 3.943  | Pmepa1   | reticulon 4                                                                                                                                                                                                                                                          |
| 10590830 | 1.518 | 5.679  | 4.35E-04 | 1.71E-02 | 0.248  | AK129341 | procollagen C-endopeptidase enhancer 2                                                                                                                                                                                                                               |
| 10514275 | 1.517 | 7.62   | 1.55E-04 | 9.18E-03 | 1.302  | Ptplad2  | prostate transmembrane protein, androgen induced 1; similar to Nedd4 WW binding protein 4                                                                                                                                                                            |
| 10604393 | 1.515 | 7.388  | 1.01E-03 | 2.77E-02 | -0.613 | Elf4     | similar to CDNA sequence AK129341; cDNA sequence AK129341                                                                                                                                                                                                            |
| 10515090 | 1.514 | 7.364  | 2.14E-04 | 1.11E-02 | 0.976  | Cdkn2c   | protein tyrosine phosphatase-like A domain containing 2                                                                                                                                                                                                              |
| 10476648 | 1.514 | 10.879 | 7.93E-04 | 2.43E-02 | -0.368 | Dstn     | predicted gene 9907                                                                                                                                                                                                                                                  |
| 10398211 | 1.514 | 5.833  | 2.34E-04 | 1.16E-02 | 0.886  | Hhip1    | cyclin-dependent kinase inhibitor 2C (p18, inhibits CDK4)                                                                                                                                                                                                            |
| 10567564 | 1.513 | 8.023  | 2.74E-03 | 4.92E-02 | -1.641 | Cdr2     | destrin                                                                                                                                                                                                                                                              |
| 10493820 | 1.513 | 6.752  | 4.48E-04 | 1.74E-02 | 0.22   | S100a6   | hedgehog interacting protein-like 1                                                                                                                                                                                                                                  |
| 10523727 | 1.511 | 8.591  | 1.25E-05 | 2.45E-03 | 3.826  | Pkd2     | cerebellar degeneration-related 2                                                                                                                                                                                                                                    |
| 10405033 | 1.507 | 8.892  | 8.00E-05 | 6.45E-03 | 1.977  | Ecm2     | S100 calcium binding protein A6 (calcylin)                                                                                                                                                                                                                           |
| 10427125 | 1.507 | 8.623  | 2.46E-05 | 3.42E-03 | 3.159  | Igfbp6   | polycystic kidney disease 2                                                                                                                                                                                                                                          |
| 10407481 | 1.507 | 9.184  | 2.65E-04 | 1.26E-02 | 0.757  | Pfkip    | extracellular matrix protein 2, female organ and adipocyte specific                                                                                                                                                                                                  |
| 10590438 | 1.506 | 6.136  | 3.76E-04 | 1.57E-02 | 0.399  | Fam198a  | insulin-like growth factor binding protein 6                                                                                                                                                                                                                         |
| 10592471 | 1.506 | 8.377  | 4.54E-04 | 1.75E-02 | 0.205  | Gramd1b  | phosphofructokinase, platelet                                                                                                                                                                                                                                        |
| 10442495 | 1.506 | 8.39   | 1.35E-04 | 8.48E-03 | 1.444  | Pkd1     | RIKEN cDNA C730027P07 gene                                                                                                                                                                                                                                           |
|          |       |        |          |          |        |          | GRAM domain containing 1B                                                                                                                                                                                                                                            |
|          |       |        |          |          |        |          | polycystic kidney disease 1 homolog                                                                                                                                                                                                                                  |

|          |       |        |          |          |        |          |                                                                                                                                                                                                 |
|----------|-------|--------|----------|----------|--------|----------|-------------------------------------------------------------------------------------------------------------------------------------------------------------------------------------------------|
| 10373223 | 1.505 | 9.801  | 4.18E-06 | 1.43E-03 | 4.89   | Lrp1     | low density lipoprotein receptor-related protein 1                                                                                                                                              |
| 10424404 | 1.505 | 5.837  | 4.59E-04 | 1.76E-02 | 0.194  | Pvt1     | plasmacytoma variant translocation 1                                                                                                                                                            |
|          |       |        |          |          |        |          | similar to Hist1h2bj protein; histone cluster 1, H2bl; predicted gene, OTTMUSG00000013203; histone cluster 1, H2bj; histone cluster 1, H2bf; H2b histone family member; histone cluster 1, H2bn |
| 10408210 | 1.5   | 9.754  | 1.44E-03 | 3.42E-02 | -0.984 | Gm13646  | predicted gene 10288; predicted gene 7589; ribosomal protein L11; predicted gene 10036; predicted gene 7384; predicted gene 6745; predicted gene 5093                                           |
| 10454097 | 1.5   | 9.047  | 3.35E-04 | 1.46E-02 | 0.518  | Gm7589   |                                                                                                                                                                                                 |
| 10467784 | 1.5   | 7.005  | 1.12E-04 | 7.68E-03 | 1.636  | Pyroxd2  | pyridine nucleotide-disulphide oxidoreductase domain 2                                                                                                                                          |
| 10438445 | 1.499 | 6.991  | 3.48E-04 | 1.50E-02 | 0.477  | Klhl6    | kelch-like 6 (Drosophila)                                                                                                                                                                       |
| 10586246 | 1.498 | 6.971  | 6.05E-04 | 2.06E-02 | -0.09  | Dennd4a  | DENN/MADD domain containing 4A                                                                                                                                                                  |
| 10554094 | 1.498 | 8.704  | 9.38E-06 | 2.12E-03 | 4.109  | Igf1r    | insulin-like growth factor I receptor                                                                                                                                                           |
| 10579331 | 1.497 | 5.932  | 1.42E-03 | 3.37E-02 | -0.965 | Gdf15    | growth differentiation factor 15                                                                                                                                                                |
| 10530666 | 1.497 | 6.315  | 8.32E-07 | 6.08E-04 | 6.391  | Lnx1     | ligand of numb-protein X 1                                                                                                                                                                      |
| 10404606 | 1.497 | 8.006  | 1.34E-03 | 3.26E-02 | -0.907 | Ly86     | lymphocyte antigen 86                                                                                                                                                                           |
|          |       |        |          |          |        |          | U3B small nuclear RNA 4; U3B small nuclear RNA 3; U3A small nuclear RNA; U3B small nuclear RNA 1                                                                                                |
| 10345704 | 1.497 | 7.785  | 3.09E-04 | 1.39E-02 | 0.599  | Snord3a  |                                                                                                                                                                                                 |
| 10340406 | 1.494 | 7.539  | 8.75E-04 | 2.57E-02 | -0.469 | Fryl     | furry homolog-like (Drosophila)                                                                                                                                                                 |
| 10562192 | 1.493 | 10.468 | 1.58E-05 | 2.67E-03 | 3.597  | Fxyd5    | FXYD domain-containing ion transport regulator 5                                                                                                                                                |
| 10511180 | 1.493 | 9.794  | 2.13E-04 | 1.11E-02 | 0.979  | Mxra8    | matrix-remodelling associated 8                                                                                                                                                                 |
| 10459084 | 1.491 | 6.825  | 7.19E-04 | 2.29E-02 | -0.267 | Synpo    | synaptopodin                                                                                                                                                                                    |
| 10358565 | 1.49  | 7.608  | 8.03E-05 | 6.45E-03 | 1.973  | Hmcn1    | hemocentin 1                                                                                                                                                                                    |
|          |       |        |          |          |        |          | secreted acidic cysteine rich glycoprotein; similar to Secreted acidic cysteine rich glycoprotein                                                                                               |
| 10386058 | 1.489 | 12.584 | 2.31E-04 | 1.15E-02 | 0.897  | Sparc    |                                                                                                                                                                                                 |
| 10538150 | 1.488 | 7.959  | 2.25E-05 | 3.27E-03 | 3.25   | Tmem176a | transmembrane protein 176A                                                                                                                                                                      |
| 10493995 | 1.487 | 11.363 | 7.63E-05 | 6.34E-03 | 2.024  | S100a10  | S100 calcium binding protein A10 (calpactin)                                                                                                                                                    |
|          |       |        |          |          |        |          | similar to sortilin-related receptor, LDLR class A repeats-containing; sortilin-related receptor, LDLR class A repeats-containing                                                               |
| 10592535 | 1.487 | 8.052  | 1.10E-03 | 2.92E-02 | -0.706 | Sorl1    |                                                                                                                                                                                                 |
| 10534889 | 1.486 | 7.759  | 7.43E-05 | 6.34E-03 | 2.051  | Agfg2    | ArfGAP with FG repeats 2                                                                                                                                                                        |
| 10457614 | 1.486 | 6.753  | 7.91E-04 | 2.43E-02 | -0.365 | Aqp4     | aquaporin 4                                                                                                                                                                                     |
|          |       |        |          |          |        |          | a disintegrin-like and metallopeptidase (repolysin type) with thrombospondin type 1 motif, 10                                                                                                   |
| 10443949 | 1.485 | 7.942  | 6.31E-05 | 5.72E-03 | 2.216  | Adamts10 |                                                                                                                                                                                                 |
| 10360684 | 1.484 | 9.203  | 2.40E-04 | 1.18E-02 | 0.857  | Ephx1    | epoxide hydrolase 1, microsomal                                                                                                                                                                 |
| 10583343 | 1.483 | 5.511  | 4.14E-04 | 1.66E-02 | 0.299  | ---      | predicted gene 4977                                                                                                                                                                             |
| 10350113 | 1.482 | 9.202  | 4.76E-04 | 1.79E-02 | 0.156  | Arl8a    | ADP-ribosylation factor-like 8A                                                                                                                                                                 |
| 10604564 | 1.482 | 9.044  | 1.96E-03 | 4.05E-02 | -1.296 | Gpc4     | glypican 4; similar to Glypican 4                                                                                                                                                               |
| 10435305 | 1.482 | 10.345 | 6.73E-06 | 1.73E-03 | 4.432  | Itgb5    | integrin beta 5                                                                                                                                                                                 |
| 10571567 | 1.479 | 11.472 | 6.38E-05 | 5.74E-03 | 2.206  | Sorbs2   | sorbin and SH3 domain containing 2                                                                                                                                                              |
| 10548128 | 1.478 | 8.927  | 8.20E-04 | 2.49E-02 | -0.403 | Tspan9   | tetraspanin 9                                                                                                                                                                                   |
| 10444658 | 1.475 | 8.904  | 5.58E-04 | 1.96E-02 | -0.007 | Clic1    | chlroride intracellular channel 1                                                                                                                                                               |
| 10357488 | 1.474 | 6.369  | 8.96E-04 | 2.60E-02 | -0.494 | Cd55     | CD55 antigen                                                                                                                                                                                    |
| 10459747 | 1.474 | 6.239  | 8.62E-05 | 6.69E-03 | 1.9    | Mapk4    | mitogen-activated protein kinase 4                                                                                                                                                              |
| 10523260 | 1.474 | 8.334  | 1.06E-04 | 7.49E-03 | 1.691  | Shroom3  | shroom family member 3                                                                                                                                                                          |

|          |       |        |          |          |        |               |                                                                                    |
|----------|-------|--------|----------|----------|--------|---------------|------------------------------------------------------------------------------------|
| 10543959 | 1.473 | 6.008  | 1.10E-03 | 2.92E-02 | -0.703 | Ptn           | pleiotrophin                                                                       |
| 10411373 | 1.472 | 8.337  | 2.10E-03 | 4.21E-02 | -1.368 | Hexb          | hexosaminidase B                                                                   |
| 10505073 | 1.472 | 7.225  | 2.04E-04 | 1.08E-02 | 1.024  | Zfp462        | zinc finger protein 462                                                            |
| 10530841 | 1.47  | 12.593 | 1.35E-05 | 2.57E-03 | 3.752  | Igfbp7        | insulin-like growth factor binding protein 7                                       |
| 10556076 | 1.469 | 6.422  | 8.98E-05 | 6.85E-03 | 1.859  | Olfml1        | olfactomedin-like 1                                                                |
| 10452633 | 1.468 | 6.858  | 5.02E-04 | 1.83E-02 | 0.102  | Tgif1         | TGFB-induced factor homeobox 1                                                     |
| 10437272 | 1.467 | 5.901  | 8.41E-05 | 6.66E-03 | 1.926  | Nlrc3         | NLR family, CARD domain containing 3                                               |
| 10428310 | 1.465 | 9.022  | 8.08E-05 | 6.46E-03 | 1.966  | Azin1         | antizyme inhibitor 1                                                               |
| 10431874 | 1.465 | 9.384  | 5.19E-04 | 1.88E-02 | 0.069  | Slc38a1       | solute carrier family 38, member 1                                                 |
| 10407420 | 1.464 | 6.923  | 1.62E-03 | 3.63E-02 | -1.099 | Net1          | predicted gene 8990; neuroepithelial cell transforming gene 1                      |
| 10478847 | 1.463 | 7.765  | 2.66E-04 | 1.26E-02 | 0.753  | Znfx1         | RIKEN cDNA 1500012F01 gene                                                         |
| 10531887 | 1.462 | 7.18   | 2.42E-04 | 1.19E-02 | 0.849  | Slc10a6       | solute carrier family 10 (sodium/bile acid cotransporter family), member 6         |
| 10489219 | 1.454 | 6.359  | 6.62E-04 | 2.17E-02 | -0.182 | D630003M21Rik | RIKEN cDNA D630003M21 gene                                                         |
| 10491721 | 1.454 | 8.878  | 8.70E-05 | 6.73E-03 | 1.892  | Spry1         | sprouty homolog 1 (Drosophila); similar to sprouty 1                               |
| 10505143 | 1.453 | 9.224  | 6.09E-04 | 2.06E-02 | -0.096 | Akap2         | A kinase (PRKA) anchor protein 2; paralemmin 2                                     |
| 10510700 | 1.453 | 7.258  | 2.13E-03 | 4.24E-02 | -1.383 | Gpr153        | G protein-coupled receptor 153                                                     |
| 10466587 | 1.452 | 5.399  | 1.96E-03 | 4.06E-02 | -1.3   | Rorb          | hypothetical protein LOC100047843; RAR-related orphan receptor beta                |
| 10378253 | 1.451 | 5.888  | 1.57E-05 | 2.67E-03 | 3.606  | Camkk1        | calcium/calmodulin-dependent protein kinase kinase 1, alpha                        |
| 10439732 | 1.451 | 5.619  | 2.19E-04 | 1.13E-02 | 0.952  | Phldb2        | phosphatidylinositol-specific phospholipase C, X domain containing 2               |
| 10479925 | 1.449 | 7.01   | 3.45E-04 | 1.50E-02 | 0.487  | 5430407P10Rik | RIKEN cDNA 5430407P10 gene                                                         |
| 10602105 | 1.449 | 6.969  | 2.95E-05 | 3.77E-03 | 2.98   | Col4a5        | collagen, type IV, alpha 5                                                         |
| 10490212 | 1.449 | 9.363  | 1.09E-04 | 7.57E-03 | 1.668  | Ctsz          | cathepsin Z                                                                        |
| 10452419 | 1.449 | 8.639  | 5.10E-05 | 4.95E-03 | 2.431  | Efna5         | ephrin A5                                                                          |
| 10500183 | 1.448 | 8.454  | 6.70E-04 | 2.19E-02 | -0.195 | Adamtsl4      | ADAMTS-like 4                                                                      |
| 10357705 | 1.448 | 6.139  | 3.98E-04 | 1.62E-02 | 0.341  | Cntn2         | contactin 2                                                                        |
| 10548105 | 1.447 | 11.17  | 1.10E-05 | 2.28E-03 | 3.954  | Ccnd2         | cyclin D2                                                                          |
| 10364593 | 1.447 | 8.864  | 2.57E-03 | 4.75E-02 | -1.577 | Cnn2          | calponin 2                                                                         |
| 10498771 | 1.447 | 5.017  | 1.12E-03 | 2.95E-02 | -0.723 | Pdcd10        | programmed cell death 10                                                           |
| 10462005 | 1.447 | 7.166  | 2.85E-05 | 3.70E-03 | 3.014  | Tmem2         | transmembrane protein 2                                                            |
| 10582997 | 1.444 | 4.836  | 2.23E-04 | 1.14E-02 | 0.933  | Casp4         | caspase 4, apoptosis-related cysteine peptidase; hypothetical protein LOC100044206 |
| 10358299 | 1.443 | 4.719  | 6.61E-04 | 2.17E-02 | -0.181 | Cfhr1         | predicted gene, EG214403                                                           |
| 10381898 | 1.442 | 7.616  | 5.87E-04 | 2.02E-02 | -0.058 | Mrc2          | mannose receptor, C type 2                                                         |
| 10551852 | 1.441 | 7.693  | 4.52E-05 | 4.67E-03 | 2.551  | Clip3         | CAP-GLY domain containing linker protein 3                                         |
| 10460666 | 1.441 | 8.629  | 2.57E-05 | 3.51E-03 | 3.115  | Ltbp3         | latent transforming growth factor beta binding protein 3                           |
| 10563077 | 1.441 | 9.371  | 1.14E-03 | 2.97E-02 | -0.745 | Rcn3          | reticulocalbin 3, EF-hand calcium binding domain                                   |
| 10586227 | 1.44  | 7.595  | 1.50E-03 | 3.51E-02 | -1.026 | Dennd4a       | RIKEN cDNA F730015K02 gene                                                         |
| 10574027 | 1.44  | 10.966 | 4.25E-04 | 1.68E-02 | 0.274  | Mt1           | metallothionein 1                                                                  |
| 10505132 | 1.439 | 8.897  | 1.41E-03 | 3.37E-02 | -0.96  | Akap2         | A kinase (PRKA) anchor protein 2; paralemmin 2                                     |
| 10421932 | 1.439 | 6.92   | 8.81E-05 | 6.76E-03 | 1.878  | Pcdh9         | protocadherin 9                                                                    |
| 10342447 | 1.439 | 6.507  | 1.87E-03 | 3.95E-02 | -1.251 | Cic           | capicua homolog (Drosophila)                                                       |

|          |       |        |          |          |        |               |                                                                                                                          |
|----------|-------|--------|----------|----------|--------|---------------|--------------------------------------------------------------------------------------------------------------------------|
| 10441497 | 1.437 | 10.152 | 1.11E-04 | 7.66E-03 | 1.642  | Tulp4         | similar to mKIAA1397 protein; tubby like protein 4                                                                       |
| 10354111 | 1.436 | 6.209  | 8.03E-05 | 6.45E-03 | 1.973  | Aff3          | AF4/FMR2 family, member 3; similar to AF4/FMR2 family member 3 (LAF-4 protein) (Lymphoid nuclear protein related to AF4) |
| 10544002 | 1.436 | 8.689  | 1.02E-04 | 7.35E-03 | 1.727  | Creb3l2       | cAMP responsive element binding protein 3-like 2                                                                         |
| 10356968 | 1.436 | 11.856 | 3.24E-05 | 3.91E-03 | 2.885  | Pam           | peptidylglycine alpha-amidating monooxygenase                                                                            |
| 10596200 | 1.436 | 6.724  | 6.50E-04 | 2.16E-02 | -0.163 | Tmem108       | transmembrane protein 108                                                                                                |
| 10408741 | 1.436 | 8.485  | 2.07E-03 | 4.17E-02 | -1.353 | Txndc5        | thioredoxin domain containing 5                                                                                          |
| 10357870 | 1.435 | 9.973  | 6.16E-05 | 5.65E-03 | 2.241  | Prelp         | proline arginine-rich end leucine-rich repeat                                                                            |
| 10491780 | 1.434 | 8.867  | 1.12E-03 | 2.95E-02 | -0.723 | Hspa4l        | heat shock protein 4 like                                                                                                |
| 10409464 | 1.433 | 8.031  | 4.12E-04 | 1.66E-02 | 0.305  | Dbn1          | drebrin 1                                                                                                                |
| 10547869 | 1.433 | 7.834  | 1.11E-04 | 7.65E-03 | 1.646  | Leprel2       | leprecan-like 2                                                                                                          |
| 10455826 | 1.433 | 5.965  | 2.67E-04 | 1.27E-02 | 0.749  | Megf10        | multiple EGF-like-domains 10                                                                                             |
| 10522024 | 1.433 | 7.557  | 1.73E-04 | 9.73E-03 | 1.196  | Tbc1d1        | TBC1 domain family, member 1; similar to TBC1 domain family member 1                                                     |
| 10406852 | 1.432 | 8.368  | 1.94E-03 | 4.04E-02 | -1.288 | Cnn3          | similar to calponin 3, acidic; predicted gene 4815; calponin 3, acidic                                                   |
| 10441494 | 1.432 | 8.1    | 4.81E-04 | 1.80E-02 | 0.146  | Tulp4         | ENSMUSG00000073472                                                                                                       |
| 10416057 | 1.431 | 11.104 | 1.42E-03 | 3.37E-02 | -0.964 | Clu           | similar to clusterin; clusterin                                                                                          |
| 10553773 | 1.43  | 6.357  | 8.03E-04 | 2.46E-02 | -0.381 | Gabbr3        | gamma-aminobutyric acid (GABA) A receptor, subunit beta 3                                                                |
| 10467139 | 1.43  | 8.66   | 1.76E-03 | 3.80E-02 | -1.188 | Lipa          | lysosomal acid lipase A                                                                                                  |
| 10513256 | 1.43  | 8.052  | 1.62E-04 | 9.37E-03 | 1.257  | Lpar1         | lysophosphatidic acid receptor 1                                                                                         |
| 10425808 | 1.43  | 8.837  | 1.39E-03 | 3.35E-02 | -0.948 | Tspo          | translocator protein                                                                                                     |
| 10470027 | 1.427 | 7.375  | 6.28E-04 | 2.11E-02 | -0.128 | Npdc1         | neural proliferation, differentiation and control gene 1                                                                 |
| 10433885 | 1.426 | 6.801  | 9.64E-04 | 2.69E-02 | -0.569 | Cebpd         | CCAAT/enhancer binding protein (C/EBP), delta                                                                            |
| 10357115 | 1.426 | 7.091  | 5.07E-04 | 1.84E-02 | 0.091  | Dsel          | dermatan sulfate epimerase-like                                                                                          |
| 10413398 | 1.425 | 7.129  | 2.67E-04 | 1.27E-02 | 0.749  | Il17rd        | interleukin 17 receptor D                                                                                                |
| 10440019 | 1.425 | 7.202  | 1.40E-03 | 3.35E-02 | -0.954 | Tmem45a       | transmembrane protein 45a                                                                                                |
| 10496837 | 1.425 | 6.16   | 6.99E-05 | 6.10E-03 | 2.113  | Ttll7         | tubulin tyrosine ligase-like family, member 7                                                                            |
| 10347807 | 1.424 | 6.294  | 1.27E-04 | 8.26E-03 | 1.509  | Col4a3        | collagen, type IV, alpha 3                                                                                               |
| 10399005 | 1.424 | 11.347 | 7.74E-05 | 6.35E-03 | 2.009  | Crip1         | cysteine-rich protein 1 (intestinal)                                                                                     |
| 10501827 | 1.423 | 6.966  | 7.70E-05 | 6.34E-03 | 2.016  | A730020M07Rik | RIKEN cDNA A730020M07 gene                                                                                               |
| 10432682 | 1.422 | 6.636  | 1.52E-03 | 3.53E-02 | -1.037 | Krt80         | keratin 80                                                                                                               |
| 10534862 | 1.422 | 10.111 | 2.13E-03 | 4.25E-02 | -1.385 | Pcolce        | procollagen C-endopeptidase enhancer protein                                                                             |
| 10453747 | 1.42  | 9.036  | 2.01E-03 | 4.11E-02 | -1.321 | Colec12       | collectin sub-family member 12                                                                                           |
| 10526853 | 1.419 | 7.205  | 4.09E-04 | 1.65E-02 | 0.313  | Fam20c        | family with sequence similarity 20, member C                                                                             |
| 10421361 | 1.418 | 8.963  | 7.05E-05 | 6.12E-03 | 2.104  | Bmp1          | bone morphogenetic protein 1                                                                                             |
| 10446376 | 1.418 | 9.203  | 1.19E-04 | 7.98E-03 | 1.572  | Man2a1        | mannosidase 2, alpha 1                                                                                                   |
| 10535559 | 1.417 | 8.241  | 2.10E-05 | 3.15E-03 | 3.319  | Baiap2l1      | BAI1-associated protein 2-like 1                                                                                         |
| 10567735 | 1.416 | 6.161  | 1.24E-04 | 8.18E-03 | 1.529  | ---           | RIKEN cDNA 3110040M04 gene                                                                                               |
| 10452485 | 1.416 | 9.22   | 1.67E-03 | 3.69E-02 | -1.131 | Rab31         | RAB31, member RAS oncogene family                                                                                        |
| 10410092 | 1.416 | 8.427  | 7.59E-05 | 6.34E-03 | 2.03   | Zfp367        | zinc finger protein 367                                                                                                  |
| 10553788 | 1.415 | 6.174  | 2.31E-04 | 1.15E-02 | 0.898  | Atp10a        | ATPase, class V, type 10A                                                                                                |
| 10523255 | 1.415 | 4.87   | 1.43E-03 | 3.39E-02 | -0.972 | Stbd1         | starch binding domain 1                                                                                                  |

|          |       |        |          |          |        |         |                                                                                                                                                                                                                                                                                                                                     |
|----------|-------|--------|----------|----------|--------|---------|-------------------------------------------------------------------------------------------------------------------------------------------------------------------------------------------------------------------------------------------------------------------------------------------------------------------------------------|
| 10577757 | 1.414 | 9.918  | 4.32E-05 | 4.56E-03 | 2.598  | Adam9   | a disintegrin and metallopeptidase domain 9 (meltrin gamma)                                                                                                                                                                                                                                                                         |
| 10604694 | 1.414 | 5.191  | 1.33E-03 | 3.25E-02 | -0.9   | Mtap7d3 | MAP7 domain containing 3<br>similar to putative SH3BGR protein; SH3-binding domain glutamic acid-rich protein                                                                                                                                                                                                                       |
| 10437180 | 1.414 | 8.764  | 4.01E-05 | 4.38E-03 | 2.673  | Sh3bgr  | acid-rich protein                                                                                                                                                                                                                                                                                                                   |
| 10362968 | 1.413 | 11.209 | 1.56E-04 | 9.18E-03 | 1.299  | Bves    | blood vessel epicardial substance                                                                                                                                                                                                                                                                                                   |
| 10393364 | 1.413 | 10.61  | 1.47E-03 | 3.46E-02 | -1.001 | Cygb    | cytoglobin                                                                                                                                                                                                                                                                                                                          |
| 10436372 | 1.413 | 8.391  | 1.23E-03 | 3.09E-02 | -0.82  | Dcbld2  | discoidin, CUB and LCCL domain containing 2                                                                                                                                                                                                                                                                                         |
| 10592719 | 1.413 | 7.779  | 7.92E-04 | 2.43E-02 | -0.367 | Oaf     | OAF homolog (Drosophila)                                                                                                                                                                                                                                                                                                            |
| 10339446 | 1.413 | 10.086 | 4.66E-04 | 1.77E-02 | 0.178  | Snmp27  | small nuclear ribonucleoprotein 27 (U4/U6.U5)                                                                                                                                                                                                                                                                                       |
| 10369844 | 1.412 | 8.335  | 1.70E-04 | 9.62E-03 | 1.211  | Bicc1   | bicaudal C homolog 1 (Drosophila)                                                                                                                                                                                                                                                                                                   |
| 10432236 | 1.412 | 5.462  | 4.17E-04 | 1.66E-02 | 0.292  | Rnd1    | Rho family GTPase 1                                                                                                                                                                                                                                                                                                                 |
| 10384579 | 1.41  | 10.393 | 2.22E-03 | 4.33E-02 | -1.425 | Ugp2    | UDP-glucose pyrophosphorylase 2                                                                                                                                                                                                                                                                                                     |
| 10416302 | 1.409 | 7.353  | 2.94E-04 | 1.35E-02 | 0.65   | Hr      | hairless                                                                                                                                                                                                                                                                                                                            |
| 10374012 | 1.408 | 6.37   | 1.47E-03 | 3.46E-02 | -1.001 | Rasl10a | RAS-like, family 10, member A                                                                                                                                                                                                                                                                                                       |
| 10436402 | 1.407 | 10.351 | 1.13E-03 | 2.95E-02 | -0.728 | Cldnd1  | claudin domain containing 1                                                                                                                                                                                                                                                                                                         |
| 10476314 | 1.407 | 10.029 | 9.17E-04 | 2.63E-02 | -0.518 | Prnd    | prion protein                                                                                                                                                                                                                                                                                                                       |
| 10386211 | 1.406 | 5.031  | 3.43E-04 | 1.49E-02 | 0.494  | Fam183b | RIKEN cDNA 3100002J23 gene                                                                                                                                                                                                                                                                                                          |
| 10544875 | 1.406 | 7.946  | 1.30E-04 | 8.31E-03 | 1.488  | Scrn1   | secernin 1                                                                                                                                                                                                                                                                                                                          |
| 10394914 | 1.405 | 7.249  | 5.35E-04 | 1.92E-02 | 0.037  | Iah1    | isoamyl acetate-hydrolyzing esterase 1 homolog (S. cerevisiae)                                                                                                                                                                                                                                                                      |
| 10420988 | 1.404 | 10.526 | 1.29E-04 | 8.31E-03 | 1.49   | Dpysl2  | dihydropyrimidinase-like 2                                                                                                                                                                                                                                                                                                          |
| 10606235 | 1.404 | 6.393  | 5.75E-04 | 2.00E-02 | -0.038 | Zdhhc15 | zinc finger, DHHC domain containing 15                                                                                                                                                                                                                                                                                              |
| 10339988 | 1.404 | 7.897  | 1.06E-03 | 2.86E-02 | -0.669 | Anapc2  | anaphase promoting complex subunit 2                                                                                                                                                                                                                                                                                                |
| 10365716 | 1.402 | 7.579  | 7.99E-05 | 6.45E-03 | 1.978  | Ikbip   | RIKEN cDNA 1200009F10 gene                                                                                                                                                                                                                                                                                                          |
| 10537146 | 1.401 | 6.458  | 2.21E-03 | 4.31E-02 | -1.419 | Akr1b8  | aldo-keto reductase family 1, member B8                                                                                                                                                                                                                                                                                             |
| 10393559 | 1.401 | 10.178 | 6.51E-04 | 2.16E-02 | -0.165 | Timp2   | tissue inhibitor of metalloproteinase 2                                                                                                                                                                                                                                                                                             |
| 10341518 | 1.401 | 4.627  | 2.58E-03 | 4.75E-02 | -1.579 | Zranb1  | zinc finger, RAN-binding domain containing 1                                                                                                                                                                                                                                                                                        |
| 10368888 | 1.4   | 8.73   | 2.19E-03 | 4.30E-02 | -1.412 | Foxo3   | forkhead box O3                                                                                                                                                                                                                                                                                                                     |
| 10354598 | 1.4   | 7.954  | 4.81E-05 | 4.81E-03 | 2.49   | Hecw2   | HECT, C2 and WW domain containing E3 ubiquitin protein ligase 2                                                                                                                                                                                                                                                                     |
| 10497149 | 1.4   | 9.423  | 1.05E-03 | 2.84E-02 | -0.658 | Wls     | G protein-coupled receptor 177<br>similar to creatine kinase, brain; predicted gene 12892; creatine kinase, brain                                                                                                                                                                                                                   |
| 10402708 | 1.399 | 10.126 | 1.10E-04 | 7.62E-03 | 1.655  | Ckb     | predicted gene 5869; predicted gene 7161; predicted gene 7105; predicted gene 5822; similar to eukaryotic translation elongation factor 1 alpha 1; predicted gene 6192; predicted gene 6392; predicted gene 6767; predicted gene 6170; predicted gene 6548; predicted gene 6789; eukaryotic translation elongation factor 1 alpha 1 |
| 10595183 | 1.399 | 12.532 | 7.10E-06 | 1.80E-03 | 4.38   | Eef1a1  | SH2 domain containing 4A                                                                                                                                                                                                                                                                                                            |
| 10572097 | 1.399 | 7.033  | 1.40E-03 | 3.35E-02 | -0.951 | Sh2d4a  | diaphanous homolog 2 (Drosophila)                                                                                                                                                                                                                                                                                                   |
| 10601616 | 1.398 | 8.594  | 4.67E-04 | 1.77E-02 | 0.175  | Diap2   | RIKEN cDNA A930041I02 gene                                                                                                                                                                                                                                                                                                          |
| 10482301 | 1.398 | 7.138  | 2.57E-03 | 4.75E-02 | -1.578 | Scai    | aldehyde dehydrogenase 1 family, member B1                                                                                                                                                                                                                                                                                          |
| 10504606 | 1.397 | 7.717  | 1.19E-03 | 3.03E-02 | -0.786 | Aldh1b1 | filamin A interacting protein 1                                                                                                                                                                                                                                                                                                     |
| 10595298 | 1.397 | 9.758  | 1.06E-03 | 2.86E-02 | -0.665 | Filip1  | lectin, galactose binding, soluble 1                                                                                                                                                                                                                                                                                                |
| 10425161 | 1.397 | 11.991 | 7.38E-05 | 6.33E-03 | 2.058  | Lgals1  | related RAS viral (r-ras) oncogene homolog 2                                                                                                                                                                                                                                                                                        |
| 10567043 | 1.397 | 9.799  | 2.07E-04 | 1.09E-02 | 1.011  | Rras2   |                                                                                                                                                                                                                                                                                                                                     |



|          |       |        |          |          |        |               |                                                                                                                   |
|----------|-------|--------|----------|----------|--------|---------------|-------------------------------------------------------------------------------------------------------------------|
| 10347481 | 1.396 | 8.518  | 1.28E-03 | 3.17E-02 | -0.859 | Cyp27a1       | cytochrome P450, family 27, subfamily a, polypeptide 1                                                            |
| 10480414 | 1.396 | 4.484  | 4.71E-04 | 1.78E-02 | 0.168  | Enkur         | enkurin, TRPC channel interacting protein                                                                         |
| 10467013 | 1.396 | 7.555  | 1.91E-04 | 1.03E-02 | 1.092  | Prkg1         | protein kinase, cGMP-dependent, type I                                                                            |
| 10358717 | 1.395 | 11.531 | 8.75E-05 | 6.74E-03 | 1.886  | 1700025G04Rik | RIKEN cDNA 1700025G04 gene                                                                                        |
| 10360506 | 1.395 | 9.735  | 1.57E-04 | 9.20E-03 | 1.293  | Akt3          | thymoma viral proto-oncogene 3                                                                                    |
| 10484283 | 1.394 | 6.951  | 1.65E-03 | 3.68E-02 | -1.12  | Pde1a         | phosphodiesterase 1A, calmodulin-dependent                                                                        |
| 10397853 | 1.394 | 7.442  | 3.36E-04 | 1.47E-02 | 0.513  | Rin3          | Ras and Rab interactor 3                                                                                          |
| 10564290 | 1.391 | 7.698  | 4.50E-05 | 4.67E-03 | 2.557  | Klf13         | Kruppel-like factor 13                                                                                            |
| 10391454 | 1.391 | 8.65   | 2.57E-05 | 3.51E-03 | 3.116  | Vat1          | vesicle amine transport protein 1 homolog (T californica)                                                         |
| 10455294 | 1.39  | 5.614  | 2.69E-03 | 4.88E-02 | -1.624 | Kctd16        | potassium channel tetramerisation domain containing 16                                                            |
| 10577164 | 1.389 | 10.088 | 9.91E-05 | 7.21E-03 | 1.759  | Gas6          | growth arrest specific 6                                                                                          |
| 10587829 | 1.389 | 8.553  | 9.84E-05 | 7.19E-03 | 1.766  | Plod2         | procollagen lysine, 2-oxoglutarate 5-dioxygenase 2                                                                |
| 10493449 | 1.389 | 6.208  | 6.24E-04 | 2.10E-02 | -0.121 | Thbs3         | thrombospondin 3                                                                                                  |
| 10521616 | 1.388 | 7.348  | 6.76E-04 | 2.19E-02 | -0.204 | C1qtnf7       | C1q and tumor necrosis factor related protein 7                                                                   |
| 10412207 | 1.387 | 10.326 | 2.11E-04 | 1.10E-02 | 0.99   | Gpx8          | glutathione peroxidase 8 (putative)                                                                               |
| 10547386 | 1.385 | 9.742  | 1.75E-03 | 3.79E-02 | -1.18  | Adipor2       | adiponectin receptor 2                                                                                            |
| 10490802 | 1.385 | 8.101  | 8.16E-04 | 2.48E-02 | -0.397 | Fam164a       | family with sequence similarity 164, member A<br>UDP-Gal:betaGlcNAc beta 1,3-galactosyltransferase, polypeptide 1 |
| 10472436 | 1.384 | 5.356  | 1.46E-04 | 8.83E-03 | 1.369  | B3galt1       | 1                                                                                                                 |
| 10487392 | 1.384 | 6.285  | 3.95E-04 | 1.62E-02 | 0.349  | Kcnp3         | Kv channel interacting protein 3, calsenilin                                                                      |
| 10499394 | 1.384 | 8.839  | 1.09E-04 | 7.59E-03 | 1.661  | Lmna          | lamin A                                                                                                           |
| 10480347 | 1.384 | 8.743  | 3.53E-04 | 1.52E-02 | 0.464  | Pip4k2a       | phosphatidylinositol-5-phosphate 4-kinase, type II, alpha                                                         |
| 10338709 | 1.383 | 8.893  | 4.93E-04 | 1.82E-02 | 0.121  | Itch          | itchy, E3 ubiquitin protein ligase                                                                                |
| 10431935 | 1.382 | 6.414  | 1.02E-03 | 2.80E-02 | -0.631 | Amigo2        | adhesion molecule with Ig like domain 2                                                                           |
| 10428192 | 1.381 | 11.391 | 1.77E-04 | 9.90E-03 | 1.17   | Pabpc1        | poly(A) binding protein, cytoplasmic 1                                                                            |
| 10549733 | 1.379 | 7.205  | 4.15E-04 | 1.66E-02 | 0.297  | A430110N23Rik | RIKEN cDNA A430110N23 gene                                                                                        |
| 10446777 | 1.379 | 7.566  | 8.35E-04 | 2.51E-02 | -0.421 | Ehd3          | EH-domain containing 3                                                                                            |
| 10435271 | 1.378 | 11.059 | 6.24E-05 | 5.71E-03 | 2.227  | Heg1          | HEG homolog 1 (zebrafish)                                                                                         |
| 10500666 | 1.378 | 8.328  | 4.91E-04 | 1.82E-02 | 0.124  | Ptgfrn        | prostaglandin F2 receptor negative regulator                                                                      |

|          |       |        |          |          |        |         |                                                        |
|----------|-------|--------|----------|----------|--------|---------|--------------------------------------------------------|
| 10416923 | 1.377 | 6.241  | 1.09E-03 | 2.92E-02 | -0.698 | ---     | ENSMUSG00000075949; ENSMUSG00000070225;                |
| 10352928 | 1.377 | 4.732  | 6.71E-04 | 2.19E-02 | -0.197 | Rp1     | ENSMUSG00000075942; ENSMUSG00000075804;                |
| 10343078 | 1.377 | 8.985  | 1.62E-03 | 3.64E-02 | -1.104 | Tmem165 | ENSMUSG00000077556; ENSMUSG00000077350;                |
| 10340193 | 1.377 | 9.41   | 1.58E-03 | 3.59E-02 | -1.075 |         | ENSMUSG00000065107; ENSMUSG00000084595;                |
| 10436304 | 1.376 | 7.943  | 1.56E-03 | 3.58E-02 | -1.061 | Abi3bp  | ENSMUSG00000077743; ENSMUSG00000075814;                |
| 10505030 | 1.376 | 8.34   | 2.49E-03 | 4.66E-02 | -1.544 | Fsd1l   | ENSMUSG00000075811; ENSMUSG00000084599;                |
| 10462702 | 1.376 | 5.452  | 7.73E-04 | 2.40E-02 | -0.341 | Hectd2  | ENSMUSG00000065102; ENSMUSG00000064631;                |
| 10376950 | 1.376 | 11.414 | 2.20E-04 | 1.13E-02 | 0.946  | Pmp22   | ENSMUSG00000075817; ENSMUSG00000070219;                |
| 10548030 | 1.375 | 7.687  | 1.12E-03 | 2.95E-02 | -0.725 | Cd9     | ENSMUSG00000064635; ENSMUSG00000075955;                |
| 10500808 | 1.375 | 10.169 | 2.16E-04 | 1.11E-02 | 0.968  | Olfml3  | ENSMUSG00000064467; ENSMUSG00000064521;                |
|          |       |        |          |          |        |         | ENSMUSG00000075820; ENSMUSG00000064770;                |
|          |       |        |          |          |        |         | ENSMUSG00000075822; ENSMUSG00000070201;                |
|          |       |        |          |          |        |         | ENSMUSG00000075921; ENSMUSG00000064906;                |
|          |       |        |          |          |        |         | ENSMUSG00000070209; ENSMUSG00000064903;                |
|          |       |        |          |          |        |         | ENSMUSG00000064455; ENSMUSG00000077437;                |
|          |       |        |          |          |        |         | ENSMUSG00000065719; ENSMUSG00000065311;                |
|          |       |        |          |          |        |         | ENSMUSG00000075836; ENSMUSG00000064515;                |
|          |       |        |          |          |        |         | ENSMUSG00000077620; ENSMUSG00000075838;                |
|          |       |        |          |          |        |         | ENSMUSG00000064519; ENSMUSG00000075931;                |
|          |       |        |          |          |        |         | ENSMUSG00000064409; ENSMUSG00000065823;                |
|          |       |        |          |          |        |         | ENSMUSG00000064798; ENSMUSG00000070192;                |
|          |       |        |          |          |        |         | ENSMUSG00000084612; ENSMUSG00000077309;                |
|          |       |        |          |          |        |         | ENSMUSG00000084613; ENSMUSG00000070199;                |
|          |       |        |          |          |        |         | ENSMUSG00000075846; ENSMUSG00000064588;                |
|          |       |        |          |          |        |         | ENSMUSG00000075788; ENSMUSG00000075792;                |
|          |       |        |          |          |        |         | ENSMUSG00000077705; ENSMUSG00000075794;                |
|          |       |        |          |          |        |         | ENSMUSG00000065005; ENSMUSG00000077706;                |
|          |       |        |          |          |        |         | ENSMUSG00000075790; ENSMUSG00000084498;                |
|          |       |        |          |          |        |         | ENSMUSG00000077313; ENSMUSG00000065149;                |
|          |       |        |          |          |        |         | ENSMUSG00000084624; ENSMUSG00000084623;                |
|          |       |        |          |          |        |         | ENSMUSG00000084492; ENSMUSG00000084491;                |
|          |       |        |          |          |        |         | ENSMUSG00000084494; ENSMUSG00000075999;                |
|          |       |        |          |          |        |         | ENSMUSG00000075859; ENSMUSG00000077316;                |
|          |       |        |          |          |        |         | ENSMUSG00000075858; ENSMUSG00000075856;                |
|          |       |        |          |          |        |         | ENSMUSG00000075799; ENSMUSG00000065691;                |
|          |       |        |          |          |        |         | ENSMUSG00000065806; ENSMUSG00000075965;                |
|          |       |        |          |          |        |         | ENSMUSG00000075962; ENSMUSG00000084480;                |
|          |       |        |          |          |        |         | ENSMUSG00000075863; ENSMUSG00000075765;                |
|          |       |        |          |          |        |         | retinitis pigmentosa 1 (human)                         |
|          |       |        |          |          |        |         | transmembrane protein 165                              |
|          |       |        |          |          |        |         | ENSMUSG00000081429                                     |
|          |       |        |          |          |        |         | ABI gene family, member 3 (NESH) binding protein       |
|          |       |        |          |          |        |         | fibronectin type III and SPRY domain containing 1-like |
|          |       |        |          |          |        |         | HECT domain containing 2                               |
|          |       |        |          |          |        |         | peripheral myelin protein 22                           |
|          |       |        |          |          |        |         | CD9 antigen                                            |
|          |       |        |          |          |        |         | olfactomedin-like 3                                    |

|          |       |        |          |          |        |               |                                                                                                                                                                             |
|----------|-------|--------|----------|----------|--------|---------------|-----------------------------------------------------------------------------------------------------------------------------------------------------------------------------|
| 10569714 | 1.374 | 6.792  | 1.81E-03 | 3.87E-02 | -1.216 | Cacng7        | calcium channel, voltage-dependent, gamma subunit 7                                                                                                                         |
| 10489053 | 1.373 | 5.497  | 1.96E-03 | 4.05E-02 | -1.296 | 4930518I15Rik | RIKEN cDNA 4930518I15 gene                                                                                                                                                  |
| 10350838 | 1.37  | 6.141  | 6.77E-04 | 2.19E-02 | -0.205 | 2810417H13Rik | ENSMUSG00000080804                                                                                                                                                          |
| 10492860 | 1.37  | 8.139  | 2.73E-03 | 4.91E-02 | -1.637 | Higd1a        | similar to hypoxia induced gene 1; predicted gene 9790                                                                                                                      |
| 10599530 | 1.37  | 4.513  | 5.51E-05 | 5.23E-03 | 2.354  | Rab33a        | RAB33A, member of RAS oncogene family                                                                                                                                       |
| 10532711 | 1.369 | 7.905  | 4.70E-04 | 1.78E-02 | 0.169  | Cmklr1        | chemokine-like receptor 1                                                                                                                                                   |
| 10459353 | 1.367 | 5.507  | 1.57E-03 | 3.59E-02 | -1.071 | Fam38b        | family with sequence similarity 38, member B2                                                                                                                               |
| 10526113 | 1.366 | 7.538  | 1.68E-03 | 3.70E-02 | -1.137 | Crcp          | calcitonin gene-related peptide-receptor component protein                                                                                                                  |
| 10443021 | 1.365 | 9.539  | 5.08E-05 | 4.95E-03 | 2.434  | Atp6v0e       | ATPase, H+ transporting, lysosomal V0 subunit E                                                                                                                             |
| 10567355 | 1.365 | 7.751  | 2.46E-03 | 4.62E-02 | -1.53  | Gprc5b        | G protein-coupled receptor, family C, group 5, member B                                                                                                                     |
| 10381371 | 1.364 | 7.15   | 1.03E-03 | 2.81E-02 | -0.634 | Aoc3          | amine oxidase, copper containing 3<br>biogenesis of lysosome-related organelles complex-1, subunit 2;<br>predicted gene 13540                                               |
| 10472095 | 1.362 | 7.228  | 1.38E-04 | 8.55E-03 | 1.425  | Bloc1s2       | numb-like                                                                                                                                                                   |
| 10551336 | 1.361 | 7.372  | 7.97E-04 | 2.44E-02 | -0.374 | Numb1         | numb-like                                                                                                                                                                   |
| 10541114 | 1.361 | 5.725  | 2.96E-04 | 1.35E-02 | 0.642  | Rasgef1a      | RasGEF domain family, member 1A                                                                                                                                             |
| 10498620 | 1.361 | 4.438  | 1.54E-03 | 3.56E-02 | -1.053 | Trim59        | similar to mouse RING finger 1; tripartite motif-containing 59<br>predicted gene 7665; S100 calcium binding protein A11<br>(calgizzarin); predicted gene 5068               |
| 10396440 | 1.36  | 5.792  | 4.64E-04 | 1.77E-02 | 0.184  | Gm5068        | small EDRK-rich factor 2                                                                                                                                                    |
| 10475350 | 1.36  | 8.438  | 8.85E-04 | 2.58E-02 | -0.481 | Serf2         | DNA segment, Chr 2, ERATO Doi 391, expressed                                                                                                                                |
| 10485048 | 1.359 | 9.937  | 1.40E-04 | 8.60E-03 | 1.412  | Atg13         | cAMP responsive element binding protein 3                                                                                                                                   |
| 10504349 | 1.359 | 8.956  | 5.37E-04 | 1.92E-02 | 0.033  | Creb3         | family with sequence similarity 129, member A                                                                                                                               |
| 10350630 | 1.359 | 8.162  | 2.18E-03 | 4.29E-02 | -1.409 | Fam129a       | solute carrier family 41, member 2                                                                                                                                          |
| 10371321 | 1.359 | 6.182  | 1.73E-03 | 3.77E-02 | -1.17  | Slc41a2       | CTD (carboxy-terminal domain, RNA polymerase II, polypeptide A) small phosphatase-like                                                                                      |
| 10590060 | 1.358 | 7.472  | 2.59E-04 | 1.24E-02 | 0.781  | Ctdspl        | family with sequence similarity 92, member A                                                                                                                                |
| 10511617 | 1.357 | 6.989  | 1.12E-03 | 2.95E-02 | -0.719 | Fam92a        | integrin beta 1 (fibronectin receptor beta)                                                                                                                                 |
| 10576661 | 1.357 | 11.062 | 9.71E-04 | 2.70E-02 | -0.576 | Itgb1         | midnolin                                                                                                                                                                    |
| 10364702 | 1.357 | 10.11  | 8.09E-04 | 2.47E-02 | -0.389 | Midn          | SH3-binding domain glutamic acid-rich protein like                                                                                                                          |
| 10601449 | 1.357 | 10.447 | 4.91E-05 | 4.83E-03 | 2.469  | Sh3bgrl       | family with sequence similarity 38, member B                                                                                                                                |
| 10459335 | 1.356 | 5.222  | 1.45E-04 | 8.83E-03 | 1.374  | Fam38b        | guanine nucleotide binding protein, alpha 13                                                                                                                                |
| 10382243 | 1.355 | 9.921  | 4.07E-04 | 1.65E-02 | 0.316  | Gna13         | similar to beta-2-syntrophin; syntrophin, basic 2                                                                                                                           |
| 10575120 | 1.355 | 8.065  | 1.21E-03 | 3.06E-02 | -0.804 | Sntb2         | xylosyltransferase 1                                                                                                                                                        |
| 10556598 | 1.355 | 7.011  | 2.88E-04 | 1.32E-02 | 0.672  | Xylt1         | cytochrome b5 domain containing 1; predicted gene 6685                                                                                                                      |
| 10384795 | 1.354 | 9.342  | 2.66E-04 | 1.26E-02 | 0.754  | Cyb5d1        | matrix metalloproteinase 2                                                                                                                                                  |
| 10573924 | 1.354 | 11.095 | 2.02E-03 | 4.12E-02 | -1.327 | Mmp2          | EH-domain containing 4                                                                                                                                                      |
| 10486396 | 1.353 | 12.042 | 2.43E-04 | 1.19E-02 | 0.844  | Ehd4          | fibroblast growth factor receptor 1                                                                                                                                         |
| 10570982 | 1.353 | 8.901  | 1.54E-03 | 3.55E-02 | -1.047 | Fgfr1         | protein kinase, AMP-activated, gamma 2 non-catalytic subunit                                                                                                                |
| 10528702 | 1.353 | 8.266  | 1.80E-03 | 3.86E-02 | -1.213 | Prkag2        | vimentin                                                                                                                                                                    |
| 10469322 | 1.353 | 12.554 | 3.04E-05 | 3.82E-03 | 2.95   | Vim           | similar to 60S ribosomal protein L13a (Transplantation antigen P198) (Tum-P198 antigen); ribosomal protein L13A; similar to 60S ribosomal protein L13a; predicted gene 6533 |
| 10389522 | 1.353 | 10.183 | 3.73E-04 | 1.56E-02 | 0.408  | Rpl13a        | calponin 1                                                                                                                                                                  |
| 10583809 | 1.352 | 6.774  | 1.47E-04 | 8.83E-03 | 1.36   | Cnn1          | ubiquitin-fold modifier 1                                                                                                                                                   |
| 10498160 | 1.352 | 9.575  | 2.21E-04 | 1.13E-02 | 0.945  | Ufm1          |                                                                                                                                                                             |

|          |       |        |          |          |        |               |                                                                                                                                |
|----------|-------|--------|----------|----------|--------|---------------|--------------------------------------------------------------------------------------------------------------------------------|
| 10498064 | 1.351 | 8.963  | 5.33E-04 | 1.91E-02 | 0.039  | Setd7         | SET domain containing (lysine methyltransferase) 7                                                                             |
| 10459643 | 1.349 | 6.204  | 1.05E-03 | 2.84E-02 | -0.655 | 4930503L19Rik | RIKEN cDNA 4930503L19 gene                                                                                                     |
| 10477090 | 1.349 | 9.455  | 3.97E-04 | 1.62E-02 | 0.344  | Tbc1d20       | TBC1 domain family, member 20                                                                                                  |
| 10476443 | 1.348 | 10.183 | 5.46E-04 | 1.94E-02 | 0.015  | Plcb4         | phospholipase C, beta 4                                                                                                        |
| 10521824 | 1.348 | 7.393  | 7.34E-04 | 2.32E-02 | -0.289 | Sod3          | superoxide dismutase 3, extracellular                                                                                          |
| 10549536 | 1.347 | 7.31   | 4.06E-04 | 1.64E-02 | 0.319  | Amn1          | antagonist of mitotic exit network 1 homolog ( <i>S. cerevisiae</i> )                                                          |
| 10406934 | 1.347 | 8.47   | 1.15E-03 | 2.98E-02 | -0.752 | Gm5454        | ets variant gene 1                                                                                                             |
| 10385941 | 1.347 | 7.295  | 9.27E-04 | 2.64E-02 | -0.529 | Tnip1         | TNFAIP3 interacting protein 1                                                                                                  |
| 10473190 | 1.346 | 7.87   | 3.80E-04 | 1.57E-02 | 0.389  | Dnajc10       | DnaJ (Hsp40) homolog, subfamily C, member 10                                                                                   |
| 10529375 | 1.345 | 9.304  | 7.95E-05 | 6.45E-03 | 1.982  | Mxd4          | Max dimerization protein 4                                                                                                     |
| 10384233 | 1.345 | 7.753  | 1.87E-04 | 1.02E-02 | 1.113  | Tns3          | tensin 3                                                                                                                       |
| 10530612 | 1.344 | 9.025  | 1.62E-04 | 9.37E-03 | 1.263  | Fryl          | furry homolog-like ( <i>Drosophila</i> )                                                                                       |
| 10409994 | 1.343 | 4.361  | 1.40E-03 | 3.35E-02 | -0.954 | Gm5665        | predicted gene 5665                                                                                                            |
| 10561178 | 1.342 | 8.235  | 1.09E-03 | 2.91E-02 | -0.691 | Rab4b         | RAB4B, member RAS oncogene family                                                                                              |
| 10578623 | 1.342 | 8.799  | 6.26E-04 | 2.10E-02 | -0.125 | Wwc2          | WW, C2 and coiled-coil domain containing 2                                                                                     |
| 10570201 | 1.341 | 9.907  | 5.67E-05 | 5.30E-03 | 2.324  | Atp11a        | ENSMUSG00000079149                                                                                                             |
| 10499666 | 1.34  | 7.623  | 1.42E-03 | 3.38E-02 | -0.968 | Atp8b2        | ATPase, class I, type 8B, member 2                                                                                             |
| 10467766 | 1.339 | 4.62   | 1.74E-03 | 3.79E-02 | -1.177 | Loxl4         | ENSMUSG00000055590                                                                                                             |
| 10543921 | 1.338 | 5.947  | 2.24E-03 | 4.35E-02 | -1.434 | Slc13a4       | solute carrier family 13 (sodium/sulfate symporters), member 4                                                                 |
| 10561104 | 1.337 | 9.945  | 8.58E-05 | 6.69E-03 | 1.906  | Axl           | AXL receptor tyrosine kinase<br>predicted gene 9529; DNA segment, Chr 3, ERATO Doi 751,<br>expressed                           |
| 10491877 | 1.337 | 6.781  | 9.20E-04 | 2.64E-02 | -0.521 | D3Erttd751e   | expressed                                                                                                                      |
| 10409978 | 1.336 | 6.322  | 2.06E-03 | 4.16E-02 | -1.351 | 6720457D02Rik | predicted gene 3325; predicted gene 7036                                                                                       |
| 10378319 | 1.335 | 7.83   | 1.66E-03 | 3.69E-02 | -1.128 | P2rx5         | purinergic receptor P2X, ligand-gated ion channel, 5                                                                           |
| 10602198 | 1.335 | 4.895  | 9.49E-05 | 7.10E-03 | 1.803  | Pak3          | p21 protein (Cdc42/Rac)-activated kinase 3                                                                                     |
| 10356088 | 1.334 | 6.473  | 1.01E-03 | 2.78E-02 | -0.62  | Col4a4        | collagen, type IV, alpha 4                                                                                                     |
| 10404407 | 1.333 | 5.983  | 1.41E-03 | 3.36E-02 | -0.958 | Foxc1         | forkhead box C1                                                                                                                |
| 10457273 | 1.333 | 10.961 | 1.00E-03 | 2.76E-02 | -0.606 | Kif5b         | kinesin family member 5B<br>predicted gene 5521; similar to mortality factor 4 like 2; mortality<br>factor 4 like 2            |
| 10606876 | 1.333 | 7.795  | 2.05E-03 | 4.14E-02 | -1.342 | Morf4l2       | neurturin                                                                                                                      |
| 10452147 | 1.333 | 8.201  | 2.70E-03 | 4.88E-02 | -1.627 | Nrtn          | neurturin                                                                                                                      |
| 10564646 | 1.333 | 4.925  | 1.83E-04 | 1.01E-02 | 1.136  | Sv2b          | synaptic vesicle glycoprotein 2 b                                                                                              |
| 10499431 | 1.333 | 7.255  | 2.34E-03 | 4.47E-02 | -1.482 | Syt11         | synaptotagmin XI; similar to synaptotagmin XI                                                                                  |
| 10590427 | 1.332 | 6.146  | 2.30E-03 | 4.44E-02 | -1.461 | Ccbp2         | chemokine binding protein 2                                                                                                    |
| 10341507 | 1.332 | 9.346  | 3.25E-04 | 1.43E-02 | 0.548  | Tmem165       | transmembrane protein 165                                                                                                      |
| 10425852 | 1.331 | 9.138  | 3.05E-04 | 1.38E-02 | 0.613  | Parvb         | parvin, beta; similar to parvin, beta                                                                                          |
| 10599377 | 1.331 | 8.546  | 1.18E-03 | 3.02E-02 | -0.777 | Stag2         | stromal antigen 2                                                                                                              |
| 10568988 | 1.33  | 7.365  | 8.32E-04 | 2.50E-02 | -0.417 | Bet1l         | blocked early in transport 1 homolog ( <i>S. cerevisiae</i> )-like                                                             |
| 10361186 | 1.33  | 6.512  | 1.70E-03 | 3.72E-02 | -1.151 | Sertad4       | SERTA domain containing 4<br>a disintegrin-like and metallopeptidase (reprolysin type) with<br>thrombospondin type 1 motif, 19 |
| 10455919 | 1.329 | 6.029  | 2.41E-03 | 4.56E-02 | -1.512 | Adamts19      | thrombospondin type 1 motif, 19                                                                                                |
| 10554166 | 1.328 | 8.405  | 6.95E-04 | 2.23E-02 | -0.233 | Akap13        | A kinase (PRKA) anchor protein 13<br>ATPase, aminophospholipid transporter-like, class I, type 8A,<br>member 2                 |
| 10420532 | 1.328 | 6.692  | 9.26E-04 | 2.64E-02 | -0.527 | Atp8a2        | ATPase, aminophospholipid transporter-like, class I, type 8A,<br>member 2                                                      |

|          |       |        |          |          |        |               |                                                                                                                                                                       |
|----------|-------|--------|----------|----------|--------|---------------|-----------------------------------------------------------------------------------------------------------------------------------------------------------------------|
| 10542200 | 1.328 | 10.088 | 3.86E-04 | 1.60E-02 | 0.371  | Gabarapl1     | gamma-aminobutyric acid (GABA) A receptor-associated protein-like 1                                                                                                   |
| 10534102 | 1.328 | 7.349  | 6.42E-04 | 2.14E-02 | -0.15  | Gusb          | glucuronidase, beta                                                                                                                                                   |
| 10403229 | 1.328 | 6.305  | 7.52E-04 | 2.36E-02 | -0.314 | Itgb8         | integrin beta 8                                                                                                                                                       |
| 10478692 | 1.328 | 5.381  | 1.94E-03 | 4.04E-02 | -1.287 | Slc2a10       | solute carrier family 2 (facilitated glucose transporter), member 10                                                                                                  |
| 10447517 | 1.327 | 7.079  | 6.00E-04 | 2.05E-02 | -0.081 | Pisd-ps2      | phosphatidylserine decarboxylase, pseudogene 2                                                                                                                        |
| 10512739 | 1.326 | 7.417  | 4.19E-04 | 1.67E-02 | 0.288  | Xpa           | xeroderma pigmentosum, complementation group A                                                                                                                        |
| 10500928 | 1.326 | 10.564 | 4.81E-04 | 1.80E-02 | 0.145  | Capza1        | capping protein (actin filament) muscle Z-line, alpha 1; similar to capping protein (actin filament) muscle Z-line, alpha 1; predicted gene 3608; predicted gene 5920 |
| 10473281 | 1.325 | 9.021  | 3.54E-04 | 1.52E-02 | 0.46   | Itgav         | integrin alpha V                                                                                                                                                      |
| 10363786 | 1.324 | 8.832  | 6.06E-04 | 2.06E-02 | -0.091 | Ank3          | ankyrin 3, epithelial                                                                                                                                                 |
| 10381601 | 1.324 | 6.922  | 5.74E-04 | 1.99E-02 | -0.035 | Mdk           | midkine pseudogene 1                                                                                                                                                  |
| 10603896 | 1.323 | 8.879  | 1.11E-03 | 2.94E-02 | -0.712 | Klhl13        | kelch-like 13 (Drosophila)                                                                                                                                            |
| 10394837 | 1.322 | 6.776  | 1.49E-03 | 3.49E-02 | -1.019 | LOC100043371  | predicted gene 9187; predicted gene 9306                                                                                                                              |
| 10541910 | 1.322 | 8.4    | 1.66E-03 | 3.69E-02 | -1.13  | Vwf           | Von Willebrand factor homolog                                                                                                                                         |
| 10404686 | 1.321 | 9.111  | 6.52E-04 | 2.16E-02 | -0.167 | Bmp6          | bone morphogenetic protein 6                                                                                                                                          |
| 10450374 | 1.321 | 6.024  | 7.91E-05 | 6.44E-03 | 1.988  | D17H6S56E-5   | DNA segment, Chr 17, human D6S56E 5                                                                                                                                   |
| 10378893 | 1.32  | 6.126  | 3.16E-05 | 3.84E-03 | 2.91   | Abhd15        | RIKEN cDNA 1300007F04 gene                                                                                                                                            |
| 10352815 | 1.32  | 6.045  | 2.13E-04 | 1.11E-02 | 0.982  | Irf6          | interferon regulatory factor 6                                                                                                                                        |
| 10371271 | 1.32  | 7.431  | 4.24E-04 | 1.68E-02 | 0.276  | Zfp781        | zinc finger protein 781                                                                                                                                               |
| 10430974 | 1.319 | 7.848  | 7.69E-04 | 2.39E-02 | -0.337 | Arfgap3       | ADP-ribosylation factor GTPase activating protein 3                                                                                                                   |
| 10366848 | 1.319 | 6.222  | 1.56E-04 | 9.18E-03 | 1.299  | B4galnt1      | beta-1,4-N-acetyl-galactosaminyl transferase 1                                                                                                                        |
| 10349401 | 1.319 | 4.675  | 2.43E-03 | 4.58E-02 | -1.519 | Gpr39         | G protein-coupled receptor 39                                                                                                                                         |
| 10352661 | 1.319 | 8.806  | 1.19E-03 | 3.03E-02 | -0.784 | Ptpn14        | protein tyrosine phosphatase, non-receptor type 14                                                                                                                    |
| 10597531 | 1.319 | 8.128  | 2.46E-03 | 4.62E-02 | -1.531 | Rbms3         | RNA binding motif, single stranded interacting protein                                                                                                                |
| 10591867 | 1.318 | 12.304 | 2.45E-04 | 1.19E-02 | 0.838  | Rpl41         | ribosomal protein L41; predicted gene 3699                                                                                                                            |
| 10468893 | 1.317 | 8.448  | 1.84E-04 | 1.01E-02 | 1.131  | Csf2ra        | colony stimulating factor 2 receptor, alpha, low-affinity (granulocyte-macrophage)                                                                                    |
| 10405587 | 1.317 | 8.703  | 2.49E-03 | 4.65E-02 | -1.542 | Tgfb1         | transforming growth factor, beta induced                                                                                                                              |
| 10518346 | 1.316 | 10.092 | 3.46E-04 | 1.50E-02 | 0.485  | Gm13051       | predicted gene 13251; predicted gene, OTTMUSG00000010657; RIKEN cDNA 1700029I01 gene                                                                                  |
| 10373662 | 1.315 | 3.952  | 4.49E-04 | 1.74E-02 | 0.216  | Olfir819      | olfactory receptor 247                                                                                                                                                |
| 10457853 | 1.314 | 9.501  | 1.88E-03 | 3.96E-02 | -1.253 | Ino80c        | INO80 complex subunit C                                                                                                                                               |
| 10343221 | 1.313 | 8.586  | 7.43E-04 | 2.34E-02 | -0.3   | Anapc2        | anaphase promoting complex subunit 2                                                                                                                                  |
| 10584435 | 1.312 | 8.765  | 4.95E-04 | 1.82E-02 | 0.116  | Vwa5a         | von Willebrand factor A domain containing 5A                                                                                                                          |
| 10599032 | 1.312 | 6.753  | 6.40E-04 | 2.14E-02 | -0.148 | Wdr44         | WD repeat domain 44                                                                                                                                                   |
| 10408629 | 1.311 | 7.226  | 1.11E-03 | 2.94E-02 | -0.713 | 1300014I06Rik | RIKEN cDNA 1300014I06 gene                                                                                                                                            |
| 10513776 | 1.311 | 6.708  | 8.98E-04 | 2.61E-02 | -0.496 | Astn2         | astrotactin 2                                                                                                                                                         |
| 10491970 | 1.311 | 9.854  | 4.76E-04 | 1.79E-02 | 0.156  | Lhfp          | lipoma HMGIC fusion partner                                                                                                                                           |
| 10588263 | 1.311 | 7.312  | 1.84E-03 | 3.92E-02 | -1.236 | Slco2a1       | solute carrier organic anion transporter family, member 2a1                                                                                                           |

|          |       |        |          |          |        |           |                                                                                                                                                                                                                                                                                                                                                                                                                                                                                                                                                                                                                                                                                                                         |
|----------|-------|--------|----------|----------|--------|-----------|-------------------------------------------------------------------------------------------------------------------------------------------------------------------------------------------------------------------------------------------------------------------------------------------------------------------------------------------------------------------------------------------------------------------------------------------------------------------------------------------------------------------------------------------------------------------------------------------------------------------------------------------------------------------------------------------------------------------------|
|          |       |        |          |          |        |           | predicted gene 5928; predicted gene 12617; predicted gene 4802; similar to ribosomal protein S27a; predicted gene 13215; predicted gene 6111; predicted gene 7808; predicted gene 6014; predicted gene 8317; ubiquitin C; ubiquitin B; similar to fusion protein: ubiquitin (bases 43_513); ribosomal protein S27a (bases 217_532); similar to ubiquitin B; predicted gene 8649; ribosomal protein S27A; predicted gene 11517; predicted gene 11808; predicted gene 8430; RIKEN cDNA 2810422J05 gene; similar to Ubc protein; predicted gene 13815; ubiquitin A-52 residue ribosomal protein fusion product 1; predicted gene 8797; predicted gene 1821; predicted gene 11759; predicted gene 5239; predicted gene 6438 |
| 10591208 | 1.309 | 10.082 | 1.33E-03 | 3.24E-02 | -0.897 | Gm5239    |                                                                                                                                                                                                                                                                                                                                                                                                                                                                                                                                                                                                                                                                                                                         |
| 10552824 | 1.309 | 11.524 | 6.80E-04 | 2.20E-02 | -0.209 | Rras      | Harvey rat sarcoma oncogene, subgroup R                                                                                                                                                                                                                                                                                                                                                                                                                                                                                                                                                                                                                                                                                 |
| 10537102 | 1.308 | 9.311  | 9.13E-04 | 2.63E-02 | -0.513 | Exoc4     | exocyst complex component 4                                                                                                                                                                                                                                                                                                                                                                                                                                                                                                                                                                                                                                                                                             |
| 10583992 | 1.308 | 7.006  | 1.93E-03 | 4.03E-02 | -1.282 | Igsf9b    | immunoglobulin superfamily, member 9B                                                                                                                                                                                                                                                                                                                                                                                                                                                                                                                                                                                                                                                                                   |
| 10447341 | 1.308 | 9.965  | 2.22E-04 | 1.14E-02 | 0.937  | Rhoq      | ras homolog gene family, member Q                                                                                                                                                                                                                                                                                                                                                                                                                                                                                                                                                                                                                                                                                       |
| 10408600 | 1.308 | 8.724  | 1.19E-03 | 3.03E-02 | -0.788 | Serpnb6a  | serine (or cysteine) peptidase inhibitor, clade B, member 6a hematological and neurological expressed sequence 1; predicted gene 3687                                                                                                                                                                                                                                                                                                                                                                                                                                                                                                                                                                                   |
| 10392943 | 1.307 | 9.958  | 6.03E-04 | 2.06E-02 | -0.087 | Hn1       | predicted gene 7603; adaptor-related protein complex 3, sigma 1 subunit; predicted gene 5610                                                                                                                                                                                                                                                                                                                                                                                                                                                                                                                                                                                                                            |
| 10574096 | 1.305 | 8.022  | 1.15E-03 | 2.97E-02 | -0.746 | Ap3s1     |                                                                                                                                                                                                                                                                                                                                                                                                                                                                                                                                                                                                                                                                                                                         |
| 10469066 | 1.305 | 6.577  | 2.72E-04 | 1.28E-02 | 0.73   | Ccdc3     | coiled-coil domain containing 3                                                                                                                                                                                                                                                                                                                                                                                                                                                                                                                                                                                                                                                                                         |
| 10371846 | 1.304 | 7.074  | 7.61E-04 | 2.38E-02 | -0.326 | Apaf1     | apoptotic peptidase activating factor 1                                                                                                                                                                                                                                                                                                                                                                                                                                                                                                                                                                                                                                                                                 |
| 10536444 | 1.304 | 6.401  | 1.75E-04 | 9.86E-03 | 1.181  | Foxp2     | forkhead box P2                                                                                                                                                                                                                                                                                                                                                                                                                                                                                                                                                                                                                                                                                                         |
| 10438358 | 1.304 | 6.539  | 8.28E-05 | 6.58E-03 | 1.941  | Gp1bb     | similar to CDCrel-1AI; septin 5                                                                                                                                                                                                                                                                                                                                                                                                                                                                                                                                                                                                                                                                                         |
| 10567299 | 1.304 | 7.838  | 2.20E-03 | 4.30E-02 | -1.416 | Itpril2   | inositol 1,4,5-triphosphate receptor interacting protein-like 2                                                                                                                                                                                                                                                                                                                                                                                                                                                                                                                                                                                                                                                         |
| 10434806 | 1.304 | 9.842  | 9.45E-04 | 2.66E-02 | -0.548 | Lpp       | ENSMUSG00000057796                                                                                                                                                                                                                                                                                                                                                                                                                                                                                                                                                                                                                                                                                                      |
| 10530558 | 1.304 | 8.532  | 6.09E-04 | 2.06E-02 | -0.097 | Slain2    | ENSMUSG00000052154                                                                                                                                                                                                                                                                                                                                                                                                                                                                                                                                                                                                                                                                                                      |
| 10595013 | 1.304 | 6.519  | 2.32E-03 | 4.45E-02 | -1.472 | Tmod2     | tropomodulin 2                                                                                                                                                                                                                                                                                                                                                                                                                                                                                                                                                                                                                                                                                                          |
|          |       |        |          |          |        |           | histone cluster 1, H2ad; histone cluster 1, H2ae; histone cluster 1, H2ag; histone cluster 1, H2ah; histone cluster 1, H2ai; similar to histone 2a; histone cluster 1, H2an; histone cluster 1, H2ao; histone cluster 1, H2ac; histone cluster 1, H2ab                                                                                                                                                                                                                                                                                                                                                                                                                                                                  |
| 10408111 | 1.303 | 9.94   | 2.40E-03 | 4.54E-02 | -1.505 | Hist1h2ai |                                                                                                                                                                                                                                                                                                                                                                                                                                                                                                                                                                                                                                                                                                                         |
| 10597900 | 1.303 | 9.242  | 6.90E-04 | 2.22E-02 | -0.225 | Zfp445    | zinc finger protein 445                                                                                                                                                                                                                                                                                                                                                                                                                                                                                                                                                                                                                                                                                                 |
| 10604230 | 1.302 | 8.556  | 1.12E-03 | 2.95E-02 | -0.718 | Ap3s1     | predicted gene 7603; adaptor-related protein complex 3, sigma 1 subunit; predicted gene 5610                                                                                                                                                                                                                                                                                                                                                                                                                                                                                                                                                                                                                            |
|          |       |        |          |          |        |           | solute carrier family 1 (neutral amino acid transporter), member 5                                                                                                                                                                                                                                                                                                                                                                                                                                                                                                                                                                                                                                                      |
| 10550332 | 1.301 | 8.15   | 1.79E-03 | 3.85E-02 | -1.208 | Slc1a5    |                                                                                                                                                                                                                                                                                                                                                                                                                                                                                                                                                                                                                                                                                                                         |
| 10444459 | 1.301 | 8.172  | 7.69E-05 | 6.34E-03 | 2.017  | Tnxb      | tenascin XB                                                                                                                                                                                                                                                                                                                                                                                                                                                                                                                                                                                                                                                                                                             |
| 10585588 | 1.299 | 7.821  | 5.27E-04 | 1.89E-02 | 0.052  | Cspg4     | chondroitin sulfate proteoglycan 4                                                                                                                                                                                                                                                                                                                                                                                                                                                                                                                                                                                                                                                                                      |
| 10567106 | 1.299 | 6.649  | 2.54E-03 | 4.72E-02 | -1.564 | Gm6816    | predicted gene 6816; ribosomal protein S4, Y-linked 2                                                                                                                                                                                                                                                                                                                                                                                                                                                                                                                                                                                                                                                                   |

|          |       |        |          |          |        |               |                                                                                                                                                                                                                                                                                                                                                                                                                                                                                                                                                                                                                                                                                                                         |
|----------|-------|--------|----------|----------|--------|---------------|-------------------------------------------------------------------------------------------------------------------------------------------------------------------------------------------------------------------------------------------------------------------------------------------------------------------------------------------------------------------------------------------------------------------------------------------------------------------------------------------------------------------------------------------------------------------------------------------------------------------------------------------------------------------------------------------------------------------------|
|          |       |        |          |          |        |               | predicted gene 16422; predicted gene 6646; ribosomal protein S12; predicted gene 12334; predicted gene 5642; predicted gene 14059; predicted gene 5462; predicted gene 7698; predicted gene 7586; similar to ribosomal protein S12; predicted gene 14958; predicted gene 15887; predicted gene 10063; predicted gene 7601; predicted gene 9153; predicted gene 7671; predicted gene 9122; similar to 40S ribosomal protein S12; predicted gene 7711; predicted gene 7567; predicted gene 7643                                                                                                                                                                                                                           |
| 10576246 | 1.299 | 8.139  | 1.94E-03 | 4.04E-02 | -1.288 | Rps12         |                                                                                                                                                                                                                                                                                                                                                                                                                                                                                                                                                                                                                                                                                                                         |
| 10585974 | 1.297 | 6.945  | 1.75E-03 | 3.79E-02 | -1.179 | Myo9a         | myosin IXa                                                                                                                                                                                                                                                                                                                                                                                                                                                                                                                                                                                                                                                                                                              |
| 10461636 | 1.296 | 4.218  | 1.94E-03 | 4.04E-02 | -1.287 | ---           | ENSMUSG00000067555                                                                                                                                                                                                                                                                                                                                                                                                                                                                                                                                                                                                                                                                                                      |
| 10529485 | 1.296 | 9.192  | 3.91E-04 | 1.61E-02 | 0.357  | Htra3         | HtrA serine peptidase 3                                                                                                                                                                                                                                                                                                                                                                                                                                                                                                                                                                                                                                                                                                 |
| 10434291 | 1.295 | 5.146  | 8.77E-05 | 6.75E-03 | 1.883  | B3gnt5        | UDP-GlcNAc:betaGal beta-1,3-N-acetylglucosaminyltransferase 5                                                                                                                                                                                                                                                                                                                                                                                                                                                                                                                                                                                                                                                           |
| 10529252 | 1.295 | 8.695  | 8.02E-04 | 2.45E-02 | -0.38  | C330019G07Rik | hypothetical protein LOC100045758; similar to EMO2; RIKEN cDNA C330019G07 gene; similar to CG6004-PB                                                                                                                                                                                                                                                                                                                                                                                                                                                                                                                                                                                                                    |
| 10458340 | 1.295 | 9.149  | 1.47E-03 | 3.46E-02 | -1.002 | Hbegf         | heparin-binding EGF-like growth factor                                                                                                                                                                                                                                                                                                                                                                                                                                                                                                                                                                                                                                                                                  |
| 10570236 | 1.294 | 7.614  | 5.37E-04 | 1.92E-02 | 0.032  | Mcf2l         | mcf.2 transforming sequence-like                                                                                                                                                                                                                                                                                                                                                                                                                                                                                                                                                                                                                                                                                        |
| 10445898 | 1.294 | 9.149  | 2.15E-03 | 4.26E-02 | -1.395 | Rab5a         | RAB5A, member RAS oncogene family; similar to small GTP-binding protein rab5                                                                                                                                                                                                                                                                                                                                                                                                                                                                                                                                                                                                                                            |
|          |       |        |          |          |        |               | predicted gene 5928; predicted gene 12617; predicted gene 4802; similar to ribosomal protein S27a; predicted gene 13215; predicted gene 6111; predicted gene 7808; predicted gene 6014; predicted gene 8317; ubiquitin C; ubiquitin B; similar to fusion protein: ubiquitin (bases 43_513); ribosomal protein S27a (bases 217_532); similar to ubiquitin B; predicted gene 8649; ribosomal protein S27A; predicted gene 11517; predicted gene 11808; predicted gene 8430; RIKEN cDNA 2810422J05 gene; similar to Ubc protein; predicted gene 13815; ubiquitin A-52 residue ribosomal protein fusion product 1; predicted gene 8797; predicted gene 1821; predicted gene 11759; predicted gene 5239; predicted gene 6438 |
| 10603009 | 1.292 | 12.349 | 1.55E-03 | 3.57E-02 | -1.058 | Gm5239        |                                                                                                                                                                                                                                                                                                                                                                                                                                                                                                                                                                                                                                                                                                                         |
| 10436519 | 1.291 | 6.48   | 4.77E-04 | 1.79E-02 | 0.153  | Robo1         | roundabout homolog 1 (Drosophila)                                                                                                                                                                                                                                                                                                                                                                                                                                                                                                                                                                                                                                                                                       |
| 10447100 | 1.29  | 8.635  | 1.09E-03 | 2.92E-02 | -0.699 | Dhx57         | MORN repeat containing 2                                                                                                                                                                                                                                                                                                                                                                                                                                                                                                                                                                                                                                                                                                |
| 10409833 | 1.29  | 9.063  | 1.14E-03 | 2.97E-02 | -0.743 | Gas1          | growth arrest specific 1                                                                                                                                                                                                                                                                                                                                                                                                                                                                                                                                                                                                                                                                                                |
| 10351013 | 1.29  | 7.902  | 2.00E-03 | 4.11E-02 | -1.316 | Rc3h1         | ENSMUSG00000073520                                                                                                                                                                                                                                                                                                                                                                                                                                                                                                                                                                                                                                                                                                      |
| 10561004 | 1.289 | 7.31   | 1.71E-03 | 3.74E-02 | -1.157 | Erf           | Ets2 repressor factor                                                                                                                                                                                                                                                                                                                                                                                                                                                                                                                                                                                                                                                                                                   |
| 10348817 | 1.289 | 11.316 | 1.26E-03 | 3.14E-02 | -0.841 | Sept2         | septin 2                                                                                                                                                                                                                                                                                                                                                                                                                                                                                                                                                                                                                                                                                                                |
| 10529636 | 1.289 | 4.92   | 1.57E-03 | 3.59E-02 | -1.07  | Stk32b        | serine/threonine kinase 32B; predicted gene 3080                                                                                                                                                                                                                                                                                                                                                                                                                                                                                                                                                                                                                                                                        |
| 10455292 | 1.288 | 4.857  | 1.46E-03 | 3.44E-02 | -0.995 | 2900055J20Rik | RIKEN cDNA 2900055J20 gene                                                                                                                                                                                                                                                                                                                                                                                                                                                                                                                                                                                                                                                                                              |
| 10359339 | 1.288 | 8.766  | 1.37E-03 | 3.31E-02 | -0.931 | Rabgap1l      | RAB GTPase activating protein 1-like                                                                                                                                                                                                                                                                                                                                                                                                                                                                                                                                                                                                                                                                                    |
| 10581395 | 1.287 | 8.139  | 1.57E-03 | 3.59E-02 | -1.071 | Slc12a4       | solute carrier family 12, member 4                                                                                                                                                                                                                                                                                                                                                                                                                                                                                                                                                                                                                                                                                      |
|          |       |        |          |          |        |               | predicted gene 14439; predicted gene 8213; predicted gene 13981; predicted gene 8451; predicted gene 6378; predicted gene 8667; predicted gene 4923; predicted gene 5908; ribosomal protein L27a; predicted gene 14044; predicted gene 7536; predicted gene 14407                                                                                                                                                                                                                                                                                                                                                                                                                                                       |
| 10406854 | 1.287 | 3.918  | 1.12E-03 | 2.95E-02 | -0.727 | Rpl27a        |                                                                                                                                                                                                                                                                                                                                                                                                                                                                                                                                                                                                                                                                                                                         |

|          |       |        |          |          |        |               |                                                                                      |
|----------|-------|--------|----------|----------|--------|---------------|--------------------------------------------------------------------------------------|
| 10460196 | 1.285 | 7.968  | 2.55E-03 | 4.73E-02 | -1.568 | 1810055G02Rik | RIKEN cDNA 1810055G02 gene                                                           |
| 10470462 | 1.285 | 7.425  | 1.28E-03 | 3.18E-02 | -0.863 | Col5a1        | collagen, type V, alpha 1                                                            |
| 10418410 | 1.285 | 8.127  | 2.28E-03 | 4.42E-02 | -1.455 | Prkcd         | protein kinase C, delta                                                              |
| 10471967 | 1.284 | 7.369  | 2.31E-03 | 4.45E-02 | -1.468 | Mbd5          | methyl-CpG binding domain protein 5                                                  |
| 10405918 | 1.284 | 6.387  | 1.61E-03 | 3.63E-02 | -1.098 | Rsl1          | regulator of sex limited protein 1                                                   |
| 10346668 | 1.283 | 8.539  | 1.80E-03 | 3.86E-02 | -1.213 | Fam117b       | hypothetical protein LOC100045775; family with sequence similarity 117, member B     |
| 10473496 | 1.283 | 4.666  | 4.86E-04 | 1.81E-02 | 0.135  | Olfr1036      | olfactory receptor 1036                                                              |
| 10355115 | 1.283 | 10.084 | 2.15E-03 | 4.26E-02 | -1.395 | Prelid1       | predicted gene 12565                                                                 |
| 10602756 | 1.283 | 11.686 | 1.08E-03 | 2.88E-02 | -0.681 | Smpx          | small muscle protein, X-linked                                                       |
| 10501608 | 1.283 | 8.16   | 1.57E-03 | 3.59E-02 | -1.071 | Vcam1         | vascular cell adhesion molecule 1                                                    |
| 10497817 | 1.282 | 11.596 | 2.52E-03 | 4.70E-02 | -1.555 | Anxa5         | annexin A5                                                                           |
| 10497842 | 1.282 | 6.365  | 1.74E-03 | 3.79E-02 | -1.177 | Bbs7          | Bardet-Biedl syndrome 7 (human)                                                      |
| 10439766 | 1.282 | 7.54   | 2.74E-03 | 4.93E-02 | -1.642 | Pvr13         | poliovirus receptor-related 3                                                        |
| 10577808 | 1.282 | 8.187  | 6.63E-04 | 2.17E-02 | -0.184 | Tacc1         | transforming, acidic coiled-coil containing protein 1                                |
| 10577048 | 1.281 | 7.68   | 1.32E-03 | 3.22E-02 | -0.888 | Ankrd10       | ankyrin repeat domain 10                                                             |
| 10550383 | 1.281 | 7.495  | 4.44E-04 | 1.73E-02 | 0.229  | Dact3         | dapper homolog 3, antagonist of beta-catenin (xenopus)                               |
| 10588899 | 1.281 | 10.063 | 3.96E-04 | 1.62E-02 | 0.346  | Gpx1          | glutathione peroxidase 1                                                             |
| 10405063 | 1.281 | 10.911 | 1.80E-03 | 3.86E-02 | -1.213 | Ogn           | osteoglycin                                                                          |
| 10510178 | 1.281 | 6.142  | 9.44E-04 | 2.66E-02 | -0.547 | Zfp534        | predicted gene 13251; predicted gene, OTTMUSG00000010657; RIKEN cDNA 1700029I01 gene |
| 10373448 | 1.28  | 12.753 | 2.30E-03 | 4.44E-02 | -1.46  | Rpl41         | ribosomal protein L41; predicted gene 3699                                           |
| 10355050 | 1.28  | 10.157 | 1.38E-03 | 3.32E-02 | -0.934 | Raph1         | Ras association (RalGDS/AF-6) and pleckstrin homology domains 1                      |



|          |       |        |          |          |        |            |                                                                                                                                                                                                                                                                                                                                                                                                                                                                                                                                                                                                                                                                                                                                                                                                                                                                                                                                                                                                                                                                                                                                                                                                                                                                                                                                   |
|----------|-------|--------|----------|----------|--------|------------|-----------------------------------------------------------------------------------------------------------------------------------------------------------------------------------------------------------------------------------------------------------------------------------------------------------------------------------------------------------------------------------------------------------------------------------------------------------------------------------------------------------------------------------------------------------------------------------------------------------------------------------------------------------------------------------------------------------------------------------------------------------------------------------------------------------------------------------------------------------------------------------------------------------------------------------------------------------------------------------------------------------------------------------------------------------------------------------------------------------------------------------------------------------------------------------------------------------------------------------------------------------------------------------------------------------------------------------|
|          |       |        |          |          |        |            | predicted gene 12618; predicted gene 8724; predicted gene 10155; predicted gene 3355; predicted gene 3713; predicted gene 3201; predicted gene 13641; similar to ribosomal protein L21; predicted gene 12411; predicted gene 5445; predicted gene 5495; predicted gene 13604; predicted gene 10045; predicted gene 14648; predicted gene 15150; predicted gene 8252; predicted gene 8157; predicted gene 8880; predicted gene 6813; predicted gene 15312; predicted gene 5534; predicted gene 8054; predicted gene 10095; predicted gene 5857; predicted gene 8195; predicted gene 8840; predicted gene 10240; predicted gene 5810; predicted gene 11975; predicted gene 5816; predicted gene 7547; predicted gene 7702; predicted gene 8012; predicted gene 8557; predicted gene 12760; predicted gene 2815; predicted gene 14336; predicted gene 7806; predicted gene 7799; predicted gene 5042; predicted gene 7062; similar to 60S ribosomal protein L21; predicted gene 8397; predicted gene 5528; ribosomal protein L21; predicted gene 11703; predicted gene 12944; predicted gene 5502; predicted gene 10163; predicted gene 7218; predicted gene 15309; ribosomal protein L21 pseudogene; predicted gene 8915; predicted gene 16060; predicted gene 13653; predicted gene 6689; predicted gene 8101; predicted gene 9130 |
| 10569996 | 1.279 | 8.757  | 2.43E-03 | 4.57E-02 | -1.518 | Rpl21-ps14 |                                                                                                                                                                                                                                                                                                                                                                                                                                                                                                                                                                                                                                                                                                                                                                                                                                                                                                                                                                                                                                                                                                                                                                                                                                                                                                                                   |
| 10484927 | 1.279 | 9.421  | 3.05E-04 | 1.38E-02 | 0.612  | Slc39a13   | solute carrier family 39 (metal ion transporter), member 13                                                                                                                                                                                                                                                                                                                                                                                                                                                                                                                                                                                                                                                                                                                                                                                                                                                                                                                                                                                                                                                                                                                                                                                                                                                                       |
| 10500204 | 1.278 | 8.802  | 1.58E-03 | 3.59E-02 | -1.077 | Ecm1       | extracellular matrix protein 1                                                                                                                                                                                                                                                                                                                                                                                                                                                                                                                                                                                                                                                                                                                                                                                                                                                                                                                                                                                                                                                                                                                                                                                                                                                                                                    |
| 10357878 | 1.277 | 7.833  | 2.35E-03 | 4.47E-02 | -1.484 | Adora1     | adenosine A1 receptor                                                                                                                                                                                                                                                                                                                                                                                                                                                                                                                                                                                                                                                                                                                                                                                                                                                                                                                                                                                                                                                                                                                                                                                                                                                                                                             |
| 10584358 | 1.277 | 4.348  | 3.21E-04 | 1.42E-02 | 0.56   | Olfir877   | olfactory receptor 877                                                                                                                                                                                                                                                                                                                                                                                                                                                                                                                                                                                                                                                                                                                                                                                                                                                                                                                                                                                                                                                                                                                                                                                                                                                                                                            |
| 10462535 | 1.277 | 5.365  | 2.19E-03 | 4.30E-02 | -1.411 | Pten       | RIKEN cDNA B430203M17 gene                                                                                                                                                                                                                                                                                                                                                                                                                                                                                                                                                                                                                                                                                                                                                                                                                                                                                                                                                                                                                                                                                                                                                                                                                                                                                                        |
|          |       |        |          |          |        |            | Tax1 (human T-cell leukemia virus type I) binding protein 3; predicted gene 13597; similar to Tax1 (human T-cell leukemia virus type I) binding protein 3                                                                                                                                                                                                                                                                                                                                                                                                                                                                                                                                                                                                                                                                                                                                                                                                                                                                                                                                                                                                                                                                                                                                                                         |
| 10472440 | 1.277 | 10.957 | 9.89E-04 | 2.74E-02 | -0.596 | Tax1bp3    |                                                                                                                                                                                                                                                                                                                                                                                                                                                                                                                                                                                                                                                                                                                                                                                                                                                                                                                                                                                                                                                                                                                                                                                                                                                                                                                                   |
| 10595831 | 1.277 | 9.63   | 1.76E-03 | 3.80E-02 | -1.187 | Zbtb38     | zinc finger and BTB domain containing 38                                                                                                                                                                                                                                                                                                                                                                                                                                                                                                                                                                                                                                                                                                                                                                                                                                                                                                                                                                                                                                                                                                                                                                                                                                                                                          |
| 10370072 | 1.276 | 7.063  | 2.02E-03 | 4.12E-02 | -1.329 | Prmt2      | protein arginine N-methyltransferase 2                                                                                                                                                                                                                                                                                                                                                                                                                                                                                                                                                                                                                                                                                                                                                                                                                                                                                                                                                                                                                                                                                                                                                                                                                                                                                            |
| 10362959 | 1.275 | 8.603  | 1.29E-03 | 3.18E-02 | -0.865 | Popdc3     | popeye domain containing 3                                                                                                                                                                                                                                                                                                                                                                                                                                                                                                                                                                                                                                                                                                                                                                                                                                                                                                                                                                                                                                                                                                                                                                                                                                                                                                        |
| 10410124 | 1.274 | 11.115 | 1.83E-04 | 1.01E-02 | 1.135  | Ctsl       | cathepsin L                                                                                                                                                                                                                                                                                                                                                                                                                                                                                                                                                                                                                                                                                                                                                                                                                                                                                                                                                                                                                                                                                                                                                                                                                                                                                                                       |
| 10368409 | 1.273 | 10.457 | 1.42E-03 | 3.38E-02 | -0.969 | Lama2      | laminin, alpha 2                                                                                                                                                                                                                                                                                                                                                                                                                                                                                                                                                                                                                                                                                                                                                                                                                                                                                                                                                                                                                                                                                                                                                                                                                                                                                                                  |
| 10504398 | 1.273 | 10.591 | 1.03E-03 | 2.80E-02 | -0.632 | Serf2      | RIKEN cDNA 2310003F16 gene                                                                                                                                                                                                                                                                                                                                                                                                                                                                                                                                                                                                                                                                                                                                                                                                                                                                                                                                                                                                                                                                                                                                                                                                                                                                                                        |
| 10533145 | 1.273 | 8.272  | 1.87E-03 | 3.95E-02 | -1.251 | Tpcn1      | two pore channel 1                                                                                                                                                                                                                                                                                                                                                                                                                                                                                                                                                                                                                                                                                                                                                                                                                                                                                                                                                                                                                                                                                                                                                                                                                                                                                                                |
| 10521537 | 1.272 | 8.891  | 7.76E-04 | 2.41E-02 | -0.346 | Cyt1l      | cytokine-like 1                                                                                                                                                                                                                                                                                                                                                                                                                                                                                                                                                                                                                                                                                                                                                                                                                                                                                                                                                                                                                                                                                                                                                                                                                                                                                                                   |
| 10572722 | 1.271 | 8.422  | 2.42E-03 | 4.57E-02 | -1.515 | ---        | predicted gene 3771                                                                                                                                                                                                                                                                                                                                                                                                                                                                                                                                                                                                                                                                                                                                                                                                                                                                                                                                                                                                                                                                                                                                                                                                                                                                                                               |
| 10564377 | 1.271 | 7.706  | 4.13E-04 | 1.66E-02 | 0.301  | Lrrk1      | leucine-rich repeat kinase 1                                                                                                                                                                                                                                                                                                                                                                                                                                                                                                                                                                                                                                                                                                                                                                                                                                                                                                                                                                                                                                                                                                                                                                                                                                                                                                      |
| 10591853 | 1.271 | 10.935 | 1.78E-03 | 3.83E-02 | -1.197 | Tbx20      | T-box 20                                                                                                                                                                                                                                                                                                                                                                                                                                                                                                                                                                                                                                                                                                                                                                                                                                                                                                                                                                                                                                                                                                                                                                                                                                                                                                                          |
| 10421758 | 1.269 | 8.57   | 2.56E-03 | 4.74E-02 | -1.573 | Akap11     | A kinase (PRKA) anchor protein 11                                                                                                                                                                                                                                                                                                                                                                                                                                                                                                                                                                                                                                                                                                                                                                                                                                                                                                                                                                                                                                                                                                                                                                                                                                                                                                 |
| 10491279 | 1.269 | 8.375  | 1.33E-04 | 8.42E-03 | 1.459  | Prkci      | protein kinase C, iota                                                                                                                                                                                                                                                                                                                                                                                                                                                                                                                                                                                                                                                                                                                                                                                                                                                                                                                                                                                                                                                                                                                                                                                                                                                                                                            |
| 10394862 | 1.268 | 7.661  | 7.64E-04 | 2.38E-02 | -0.33  | Asap2      | development and differentiation enhancing factor 2                                                                                                                                                                                                                                                                                                                                                                                                                                                                                                                                                                                                                                                                                                                                                                                                                                                                                                                                                                                                                                                                                                                                                                                                                                                                                |

|          |       |        |          |          |        |               |                                                                                                                                                                                                                                                                                                                                                                                                                                                                                                                                                                                                                                                                                               |
|----------|-------|--------|----------|----------|--------|---------------|-----------------------------------------------------------------------------------------------------------------------------------------------------------------------------------------------------------------------------------------------------------------------------------------------------------------------------------------------------------------------------------------------------------------------------------------------------------------------------------------------------------------------------------------------------------------------------------------------------------------------------------------------------------------------------------------------|
| 10542156 | 1.268 | 8.678  | 2.17E-03 | 4.28E-02 | -1.402 | Clec2d        | C-type lectin domain family 2, member d                                                                                                                                                                                                                                                                                                                                                                                                                                                                                                                                                                                                                                                       |
| 10555197 | 1.268 | 6.013  | 2.22E-03 | 4.33E-02 | -1.427 | Mtap6         | microtubule-associated protein 6                                                                                                                                                                                                                                                                                                                                                                                                                                                                                                                                                                                                                                                              |
| 10569513 | 1.268 | 7.922  | 3.13E-04 | 1.40E-02 | 0.586  | Osbpl5        | oxysterol binding protein-like 5                                                                                                                                                                                                                                                                                                                                                                                                                                                                                                                                                                                                                                                              |
| 10384152 | 1.268 | 8.347  | 1.67E-04 | 9.55E-03 | 1.226  | Purb          | purine rich element binding protein B                                                                                                                                                                                                                                                                                                                                                                                                                                                                                                                                                                                                                                                         |
| 10405216 | 1.268 | 7.294  | 2.38E-03 | 4.52E-02 | -1.498 | Sykb          | spleen tyrosine kinase<br>RIKEN cDNA 1700023B02 gene; predicted gene 5605; similar to CBF1 interacting corepressor; predicted gene 13803; predicted gene 2810                                                                                                                                                                                                                                                                                                                                                                                                                                                                                                                                 |
| 10483667 | 1.266 | 6.812  | 2.54E-03 | 4.72E-02 | -1.563 | Cir1          | gene 2810                                                                                                                                                                                                                                                                                                                                                                                                                                                                                                                                                                                                                                                                                     |
| 10453797 | 1.266 | 4.842  | 7.60E-04 | 2.38E-02 | -0.324 | Greb1l        | cDNA sequence AK220484                                                                                                                                                                                                                                                                                                                                                                                                                                                                                                                                                                                                                                                                        |
| 10435704 | 1.265 | 5.715  | 9.06E-04 | 2.62E-02 | -0.505 | Cd80          | CD80 antigen                                                                                                                                                                                                                                                                                                                                                                                                                                                                                                                                                                                                                                                                                  |
| 10464877 | 1.265 | 7.886  | 2.78E-03 | 4.97E-02 | -1.656 | Dpp3          | dipeptidylpeptidase 3                                                                                                                                                                                                                                                                                                                                                                                                                                                                                                                                                                                                                                                                         |
| 10386628 | 1.265 | 6.568  | 8.83E-04 | 2.58E-02 | -0.479 | Gm16515       | gene trap locus F3b                                                                                                                                                                                                                                                                                                                                                                                                                                                                                                                                                                                                                                                                           |
| 10562260 | 1.265 | 8.066  | 1.76E-03 | 3.80E-02 | -1.188 | Gramd1a       | GRAM domain containing 1A                                                                                                                                                                                                                                                                                                                                                                                                                                                                                                                                                                                                                                                                     |
| 10475890 | 1.264 | 7.123  | 1.15E-04 | 7.77E-03 | 1.611  | Mertk         | c-mer proto-oncogene tyrosine kinase                                                                                                                                                                                                                                                                                                                                                                                                                                                                                                                                                                                                                                                          |
| 10348424 | 1.263 | 7.32   | 8.51E-04 | 2.53E-02 | -0.44  | Sh3bp4        | SH3-domain binding protein 4                                                                                                                                                                                                                                                                                                                                                                                                                                                                                                                                                                                                                                                                  |
| 10510225 | 1.262 | 4.436  | 1.04E-03 | 2.82E-02 | -0.643 | ---           | ENSMUSG00000078500                                                                                                                                                                                                                                                                                                                                                                                                                                                                                                                                                                                                                                                                            |
| 10516027 | 1.262 | 7.989  | 2.17E-03 | 4.28E-02 | -1.4   | Rlf           | rearranged L-myc fusion sequence                                                                                                                                                                                                                                                                                                                                                                                                                                                                                                                                                                                                                                                              |
| 10535095 | 1.262 | 10.144 | 4.55E-04 | 1.75E-02 | 0.202  | Zfand2a       | zinc finger, AN1-type domain 2A<br><br>predicted gene 16422; predicted gene 6646; ribosomal protein S12; predicted gene 12334; predicted gene 5642; predicted gene 14059; predicted gene 5462; predicted gene 7698; predicted gene 7586; similar to ribosomal protein S12; predicted gene 14958; predicted gene 15887; predicted gene 10063; predicted gene 7601; predicted gene 9153; predicted gene 7671; predicted gene 9122; similar to 40S ribosomal protein S12; predicted gene 7711; predicted gene 7567; predicted gene 7643                                                                                                                                                          |
| 10606581 | 1.261 | 9.306  | 2.00E-03 | 4.11E-02 | -1.319 | Rps12-ps2     | ribosomal protein S27-like                                                                                                                                                                                                                                                                                                                                                                                                                                                                                                                                                                                                                                                                    |
| 10586604 | 1.26  | 10.452 | 5.48E-04 | 1.94E-02 | 0.013  | Rps27l        | ribosomal protein S27-like                                                                                                                                                                                                                                                                                                                                                                                                                                                                                                                                                                                                                                                                    |
| 10408266 | 1.259 | 5.681  | 2.04E-03 | 4.14E-02 | -1.341 | Hist1h2ba     | histone cluster 1, H2ba<br>RIKEN cDNA 1110032A03 gene; hypothetical protein LOC100048251                                                                                                                                                                                                                                                                                                                                                                                                                                                                                                                                                                                                      |
| 10593421 | 1.258 | 8.296  | 1.30E-03 | 3.20E-02 | -0.876 | 1110032A03Rik | LOC100048251                                                                                                                                                                                                                                                                                                                                                                                                                                                                                                                                                                                                                                                                                  |
| 10505120 | 1.258 | 7.137  | 6.30E-04 | 2.11E-02 | -0.132 | Palm2         | A kinase (PRKA) anchor protein 2; paralemmin 2<br>similar to ribosomal protein; predicted gene 6344; predicted gene 11449; predicted gene 13841; predicted gene 8210; hypothetical protein LOC675793; ribosomal protein L29; predicted gene 12704; predicted gene 7252; predicted gene 8965; predicted gene 13213; predicted gene 8580; predicted gene 15526; predicted gene 7934; predicted gene 5218; predicted gene 5561; predicted gene 8548; predicted gene 12447; predicted gene 8852; predicted gene 12508; predicted gene 6010; predicted gene 13921; predicted gene 8860; predicted gene 13545; predicted gene 9405; predicted gene 6862; predicted gene 13141; predicted gene 10709 |
| 10490824 | 1.257 | 8.576  | 1.30E-03 | 3.20E-02 | -0.876 | Rpl29         | 13141; predicted gene 10709                                                                                                                                                                                                                                                                                                                                                                                                                                                                                                                                                                                                                                                                   |
| 10473384 | 1.257 | 11.142 | 2.24E-04 | 1.14E-02 | 0.927  | Slc43a3       | solute carrier family 43, member 3                                                                                                                                                                                                                                                                                                                                                                                                                                                                                                                                                                                                                                                            |
| 10406877 | 1.256 | 7.265  | 9.02E-04 | 2.61E-02 | -0.501 | Serf1         | small EDRK-rich factor 1                                                                                                                                                                                                                                                                                                                                                                                                                                                                                                                                                                                                                                                                      |

|          |       |        |          |          |        |               |                                                                                                                                                                                                                                                                                                                                                                                                                                                                                                                                                                                                                                             |
|----------|-------|--------|----------|----------|--------|---------------|---------------------------------------------------------------------------------------------------------------------------------------------------------------------------------------------------------------------------------------------------------------------------------------------------------------------------------------------------------------------------------------------------------------------------------------------------------------------------------------------------------------------------------------------------------------------------------------------------------------------------------------------|
| 10550406 | 1.255 | 6.407  | 2.47E-03 | 4.63E-02 | -1.534 | Ccdc8         | coiled-coil domain containing 8                                                                                                                                                                                                                                                                                                                                                                                                                                                                                                                                                                                                             |
| 10495659 | 1.254 | 9.497  | 1.10E-03 | 2.93E-02 | -0.708 | Cnn3          | similar to calponin 3, acidic; predicted gene 4815; calponin 3, acidic                                                                                                                                                                                                                                                                                                                                                                                                                                                                                                                                                                      |
| 10506939 | 1.254 | 9.278  | 1.04E-03 | 2.83E-02 | -0.649 | Eps15         | epidermal growth factor receptor pathway substrate 15                                                                                                                                                                                                                                                                                                                                                                                                                                                                                                                                                                                       |
| 10570975 | 1.254 | 9.861  | 3.13E-04 | 1.40E-02 | 0.588  | Tm2d2         | TM2 domain containing 2                                                                                                                                                                                                                                                                                                                                                                                                                                                                                                                                                                                                                     |
| 10555425 | 1.253 | 8.147  | 8.77E-04 | 2.57E-02 | -0.472 | Fam168a       | family with sequence similarity 168, member A                                                                                                                                                                                                                                                                                                                                                                                                                                                                                                                                                                                               |
| 10508651 | 1.253 | 8.784  | 2.31E-03 | 4.45E-02 | -1.468 | Sdc3          | syndecan 3                                                                                                                                                                                                                                                                                                                                                                                                                                                                                                                                                                                                                                  |
| 10345074 | 1.252 | 4.159  | 2.77E-04 | 1.29E-02 | 0.71   | Cetn4         | ENSMUSG00000046847                                                                                                                                                                                                                                                                                                                                                                                                                                                                                                                                                                                                                          |
|          |       |        |          |          |        |               | similar to ribosomal protein; predicted gene 6344; predicted gene 11449; predicted gene 13841; predicted gene 8210; hypothetical protein LOC675793; ribosomal protein L29; predicted gene 12704; predicted gene 7252; predicted gene 8965; predicted gene 13213; predicted gene 8580; predicted gene 15526; predicted gene 7934; predicted gene 5218; predicted gene 5561; predicted gene 8548; predicted gene 12447; predicted gene 8852; predicted gene 12508; predicted gene 6010; predicted gene 13921; predicted gene 8860; predicted gene 13545; predicted gene 9405; predicted gene 6862; predicted gene 13141; predicted gene 10709 |
| 10533023 | 1.252 | 12.763 | 8.79E-04 | 2.57E-02 | -0.473 | Gm3550        |                                                                                                                                                                                                                                                                                                                                                                                                                                                                                                                                                                                                                                             |
| 10485745 | 1.25  | 4.355  | 4.67E-04 | 1.77E-02 | 0.176  | Ano3          | anoctamin 3                                                                                                                                                                                                                                                                                                                                                                                                                                                                                                                                                                                                                                 |
| 10502469 | 1.25  | 11.791 | 1.15E-03 | 2.98E-02 | -0.752 | Pdlim5        | PDZ and LIM domain 5                                                                                                                                                                                                                                                                                                                                                                                                                                                                                                                                                                                                                        |
| 10514158 | 1.25  | 6.892  | 1.14E-03 | 2.97E-02 | -0.745 | Psip1         | PC4 and SFRS1 interacting protein 1                                                                                                                                                                                                                                                                                                                                                                                                                                                                                                                                                                                                         |
| 10427744 | 1.25  | 7.094  | 1.58E-03 | 3.59E-02 | -1.075 | Rai14         | retinoic acid induced 14                                                                                                                                                                                                                                                                                                                                                                                                                                                                                                                                                                                                                    |
| 10382136 | 0.769 | 6.553  | 9.51E-04 | 2.67E-02 | -0.555 | 1810010H24Rik | RIKEN cDNA 1810010H24 gene                                                                                                                                                                                                                                                                                                                                                                                                                                                                                                                                                                                                                  |
| 10582390 | 0.769 | 7.784  | 3.43E-04 | 1.49E-02 | 0.492  | Aprt          | adenine phosphoribosyl transferase                                                                                                                                                                                                                                                                                                                                                                                                                                                                                                                                                                                                          |
| 10479938 | 0.769 | 7.845  | 7.26E-04 | 2.31E-02 | -0.278 | Echdc3        | enoyl Coenzyme A hydratase domain containing 3                                                                                                                                                                                                                                                                                                                                                                                                                                                                                                                                                                                              |
|          |       |        |          |          |        |               | resistance to inhibitors of cholinesterase 8 homolog B (C. elegans)                                                                                                                                                                                                                                                                                                                                                                                                                                                                                                                                                                         |
| 10365408 | 0.769 | 9.051  | 2.19E-03 | 4.30E-02 | -1.413 | Ric8b         |                                                                                                                                                                                                                                                                                                                                                                                                                                                                                                                                                                                                                                             |
| 10457475 | 0.768 | 6.796  | 1.10E-03 | 2.92E-02 | -0.7   | Abhd3         | abhydrolase domain containing 3                                                                                                                                                                                                                                                                                                                                                                                                                                                                                                                                                                                                             |
| 10422822 | 0.768 | 8.737  | 5.99E-04 | 2.05E-02 | -0.08  | Lifr          | leukemia inhibitory factor receptor                                                                                                                                                                                                                                                                                                                                                                                                                                                                                                                                                                                                         |
| 10572130 | 0.768 | 12.687 | 3.71E-04 | 1.56E-02 | 0.411  | Lpl           | lipoprotein lipase; similar to Lipoprotein lipase precursor (LPL)                                                                                                                                                                                                                                                                                                                                                                                                                                                                                                                                                                           |
|          |       |        |          |          |        |               | phosphoribosylformylglycinamide synthase (FGAR amidotransferase)                                                                                                                                                                                                                                                                                                                                                                                                                                                                                                                                                                            |
| 10387222 | 0.768 | 6.611  | 5.62E-04 | 1.97E-02 | -0.014 | Pfas          |                                                                                                                                                                                                                                                                                                                                                                                                                                                                                                                                                                                                                                             |
| 10343572 | 0.768 | 12.172 | 6.06E-04 | 2.06E-02 | -0.091 | Canx          | calnexin                                                                                                                                                                                                                                                                                                                                                                                                                                                                                                                                                                                                                                    |
| 10600341 | 0.767 | 10.076 | 2.73E-04 | 1.28E-02 | 0.727  | Emd           | emerin                                                                                                                                                                                                                                                                                                                                                                                                                                                                                                                                                                                                                                      |
| 10503856 | 0.767 | 6.121  | 1.10E-03 | 2.92E-02 | -0.7   | Gabbr2        | gamma-aminobutyric acid (GABA) C receptor, subunit rho 2                                                                                                                                                                                                                                                                                                                                                                                                                                                                                                                                                                                    |
|          |       |        |          |          |        |               | solute carrier family 24 (sodium/potassium/calcium exchanger), member 3                                                                                                                                                                                                                                                                                                                                                                                                                                                                                                                                                                     |
| 10476740 | 0.767 | 6.24   | 1.27E-03 | 3.16E-02 | -0.854 | Slc24a3       |                                                                                                                                                                                                                                                                                                                                                                                                                                                                                                                                                                                                                                             |
| 10545697 | 0.766 | 9.516  | 3.18E-04 | 1.41E-02 | 0.569  | Dguok         | deoxyguanosine kinase                                                                                                                                                                                                                                                                                                                                                                                                                                                                                                                                                                                                                       |
| 10571321 | 0.766 | 6.535  | 9.33E-04 | 2.65E-02 | -0.535 | Ppp1r3b       | protein phosphatase 1, regulatory (inhibitor) subunit 3B                                                                                                                                                                                                                                                                                                                                                                                                                                                                                                                                                                                    |
| 10423030 | 0.766 | 5.285  | 2.15E-04 | 1.11E-02 | 0.971  | Prlr          | prolactin receptor                                                                                                                                                                                                                                                                                                                                                                                                                                                                                                                                                                                                                          |
| 10468533 | 0.766 | 9.972  | 2.80E-03 | 5.00E-02 | -1.663 | Gpam          | glycerol-3-phosphate acyltransferase, mitochondrial                                                                                                                                                                                                                                                                                                                                                                                                                                                                                                                                                                                         |
| 10533360 | 0.765 | 7.734  | 9.39E-04 | 2.66E-02 | -0.542 | 9330129D05Rik | RIKEN cDNA 9330129D05 gene                                                                                                                                                                                                                                                                                                                                                                                                                                                                                                                                                                                                                  |
| 10568735 | 0.765 | 7.631  | 2.27E-03 | 4.40E-02 | -1.449 | Ebf3          | early B-cell factor 3                                                                                                                                                                                                                                                                                                                                                                                                                                                                                                                                                                                                                       |
| 10364072 | 0.765 | 6.403  | 4.94E-04 | 1.82E-02 | 0.118  | Ggt5          | gamma-glutamyltransferase 5                                                                                                                                                                                                                                                                                                                                                                                                                                                                                                                                                                                                                 |

|          |       |        |          |          |        |               |                                                              |
|----------|-------|--------|----------|----------|--------|---------------|--------------------------------------------------------------|
| 10370000 | 0.765 | 7.989  | 2.49E-04 | 1.21E-02 | 0.823  | Gstt1         | glutathione S-transferase, theta 1                           |
| 10562096 | 0.765 | 9.793  | 1.83E-03 | 3.90E-02 | -1.228 | Tmem147       | transmembrane protein 147                                    |
| 10362490 | 0.765 | 6.581  | 1.09E-04 | 7.59E-03 | 1.662  | Tspyl4        | TSPY-like 4                                                  |
| 10575961 | 0.765 | 8.995  | 1.37E-04 | 8.51E-03 | 1.433  | Usp10         | ubiquitin specific peptidase 10                              |
| 10519988 | 0.764 | 8.034  | 2.11E-03 | 4.22E-02 | -1.375 | Fam185a       | expressed sequence AI847670                                  |
| 10370999 | 0.764 | 8.425  | 1.20E-03 | 3.05E-02 | -0.795 | Lingo3        | leucine rich repeat and Ig domain containing 3               |
| 10490794 | 0.764 | 10.045 | 4.27E-04 | 1.69E-02 | 0.268  | Pkia          | protein kinase inhibitor, alpha                              |
| 10471337 | 0.764 | 7.967  | 3.14E-04 | 1.40E-02 | 0.584  | Pomt1         | protein-O-mannosyltransferase 1                              |
| 10388310 | 0.764 | 9.009  | 6.97E-05 | 6.10E-03 | 2.116  | Rap1gap2      | GTPase activating RANGAP domain-like 4                       |
| 10488472 | 0.763 | 7.608  | 1.82E-03 | 3.89E-02 | -1.222 | 2310001A20Rik | RIKEN cDNA 2310001A20 gene                                   |
| 10364601 | 0.763 | 6.458  | 1.17E-03 | 3.00E-02 | -0.766 | Abca7         | ATP-binding cassette, sub-family A (ABC1), member 7          |
| 10554076 | 0.763 | 6.827  | 1.95E-03 | 4.04E-02 | -1.292 | Lysmd4        | LysM, putative peptidoglycan-binding, domain containing 4    |
| 10592330 | 0.763 | 6.165  | 5.85E-04 | 2.02E-02 | -0.055 | Nrgn          | neurogranin                                                  |
| 10569069 | 0.763 | 10.012 | 1.60E-03 | 3.62E-02 | -1.092 | Rps9          | ribosomal protein S9; predicted gene 5905                    |
| 10395058 | 0.762 | 8.887  | 2.00E-03 | 4.11E-02 | -1.32  | Adi1          | acireductone dioxygenase 1                                   |
| 10603116 | 0.762 | 10.627 | 1.91E-03 | 4.01E-02 | -1.269 | Asb11         | ankyrin repeat and SOCS box-containing 11                    |
| 10361754 | 0.762 | 7.837  | 1.90E-04 | 1.03E-02 | 1.098  | Epm2a         | epilepsy, progressive myoclonic epilepsy, type 2 gene alpha  |
| 10506301 | 0.762 | 5.369  | 9.23E-05 | 6.98E-03 | 1.831  | Lepr          | leptin receptor                                              |
| 10419532 | 0.762 | 9.152  | 9.30E-05 | 7.02E-03 | 1.823  | Osgep         | O-sialoglycoprotein endopeptidase                            |
| 10566529 | 0.762 | 9.911  | 4.14E-04 | 1.66E-02 | 0.3    | Tpp1          | tripeptidyl peptidase I                                      |
| 10427997 | 0.761 | 7.73   | 1.31E-03 | 3.21E-02 | -0.881 | Ankrd33b      | ankyrin repeat domain 33B                                    |
| 10538658 | 0.761 | 8.681  | 2.32E-03 | 4.45E-02 | -1.471 | Herc3         | hect domain and RLD 3                                        |
| 10602592 | 0.761 | 11.676 | 7.26E-05 | 6.26E-03 | 2.075  | Hsd17b10      | hydroxysteroid (17-beta) dehydrogenase 10                    |
| 10451953 | 0.761 | 8.597  | 2.97E-04 | 1.35E-02 | 0.64   | Lrg1          | leucine-rich alpha-2-glycoprotein 1                          |
| 10348277 | 0.76  | 8.372  | 9.97E-05 | 7.21E-03 | 1.754  | Atg16l1       | autophagy-related 16-like 1 (yeast)                          |
| 10495625 | 0.76  | 5.955  | 1.99E-03 | 4.11E-02 | -1.316 | Dpyd          | dihydropyrimidine dehydrogenase                              |
| 10574944 | 0.76  | 6.946  | 1.37E-04 | 8.51E-03 | 1.433  | Dus2l         | dihydrouridine synthase 2-like (SMM1, <i>S. cerevisiae</i> ) |
| 10579925 | 0.76  | 9.856  | 1.13E-03 | 2.95E-02 | -0.734 | Gab1          | growth factor receptor bound protein 2-associated protein 1  |
| 10564857 | 0.76  | 12.555 | 1.39E-04 | 8.59E-03 | 1.416  | Idh2          | isocitrate dehydrogenase 2 (NADP+), mitochondrial            |
| 10362876 | 0.76  | 7.699  | 1.94E-03 | 4.04E-02 | -1.286 | Pdss2         | prenyl (solanesyl) diphosphate synthase, subunit 2           |
| 10422028 | 0.76  | 8.863  | 8.29E-05 | 6.58E-03 | 1.94   | Tbc1d4        | TBC1 domain family, member 4                                 |
| 10539907 | 0.76  | 9.167  | 1.11E-03 | 2.94E-02 | -0.713 | Tpra1         | G protein-coupled receptor 175                               |
| 10491613 | 0.759 | 8.897  | 2.33E-03 | 4.46E-02 | -1.477 | 4932438A13Rik | RIKEN cDNA 4932438A13 gene                                   |
| 10585834 | 0.759 | 6.888  | 1.15E-03 | 2.98E-02 | -0.751 | 6030419C18Rik | RIKEN cDNA 6030419C18 gene; hypothetical protein             |
| 10524460 | 0.759 | 9.746  | 1.44E-04 | 8.82E-03 | 1.382  | Acacb         | LOC100048292                                                 |
| 10592816 | 0.759 | 9.059  | 2.77E-03 | 4.96E-02 | -1.652 | Hmbs          | acetyl-Coenzyme A carboxylase beta                           |
| 10542824 | 0.759 | 8.206  | 2.22E-03 | 4.33E-02 | -1.427 | Mrps35        | hydroxymethylbilane synthase                                 |
| 10404763 | 0.759 | 8.527  | 8.53E-04 | 2.53E-02 | -0.443 | Tmem170b      | mitochondrial ribosomal protein S35                          |
| 10339754 | 0.759 | 8.841  | 9.65E-04 | 2.69E-02 | -0.57  | Anapc1        | transmembrane protein 170B                                   |
| 10484203 | 0.758 | 11.13  | 2.25E-03 | 4.36E-02 | -1.438 | Ccdc141       | anaphase promoting complex subunit 1                         |
| 10460312 | 0.758 | 8.525  | 1.34E-04 | 8.45E-03 | 1.453  | Cdk2ap2       | RIKEN cDNA 2610301F02 gene                                   |
| 10420935 | 0.757 | 10.319 | 5.12E-04 | 1.86E-02 | 0.081  | Ephx2         | CDK2-associated protein 2                                    |
|          |       |        |          |          |        |               | epoxide hydrolase 2, cytoplasmic                             |

|          |       |        |          |          |        |           |                                                                                                                             |
|----------|-------|--------|----------|----------|--------|-----------|-----------------------------------------------------------------------------------------------------------------------------|
| 10382435 | 0.757 | 7.001  | 3.98E-04 | 1.62E-02 | 0.34   | Gprc5c    | G protein-coupled receptor, family C, group 5, member C; similar to G protein-coupled receptor, family C, group 5, member C |
| 10587315 | 0.757 | 9.657  | 2.05E-04 | 1.08E-02 | 1.021  | Gsta4     | glutathione S-transferase, alpha 4                                                                                          |
| 10502780 | 0.757 | 10.776 | 2.14E-03 | 4.25E-02 | -1.387 | Lphn2     | latrophilin 2                                                                                                               |
| 10347564 | 0.756 | 8.614  | 1.16E-04 | 7.83E-03 | 1.599  | Dnajb2    | DnaJ (Hsp40) homolog, subfamily B, member 2                                                                                 |
| 10550400 | 0.756 | 5.606  | 1.81E-04 | 1.00E-02 | 1.147  | Pnmal2    | PNMA-like 2                                                                                                                 |
| 10342369 | 0.756 | 9.89   | 3.55E-04 | 1.52E-02 | 0.458  | Copa      | coatamer protein complex subunit alpha                                                                                      |
| 10528622 | 0.755 | 8.287  | 2.19E-03 | 4.30E-02 | -1.411 | Asb10     | ankyrin repeat and SOCS box-containing 10                                                                                   |
| 10550915 | 0.755 | 6.078  | 1.02E-03 | 2.80E-02 | -0.629 | Cadm4     | cell adhesion molecule 4                                                                                                    |
| 10548815 | 0.755 | 8.51   | 8.40E-04 | 2.51E-02 | -0.427 | Coq2      | coenzyme Q2 homolog, prenyltransferase (yeast); predicted gene 6728                                                         |
| 10483150 | 0.755 | 6.972  | 8.43E-04 | 2.52E-02 | -0.43  | Fign      | fidgetin                                                                                                                    |
| 10406865 | 0.755 | 8.188  | 9.82E-04 | 2.73E-02 | -0.588 | Mrps27    | mitochondrial ribosomal protein S27                                                                                         |
| 10360349 | 0.754 | 5.623  | 2.09E-05 | 3.15E-03 | 3.319  | Cadm3     | cell adhesion molecule 3                                                                                                    |
| 10370413 | 0.754 | 10.534 | 1.01E-04 | 7.25E-03 | 1.745  | D10Jhu81e | similar to es1 protein; DNA segment, Chr 10, Johns Hopkins University 81 expressed                                          |
| 10475144 | 0.754 | 6.606  | 3.71E-05 | 4.10E-03 | 2.749  | Ganc      | calpain 3                                                                                                                   |
| 10393628 | 0.754 | 8.349  | 1.23E-03 | 3.09E-02 | -0.822 | Tbc1d16   | TBC1 domain family, member 16                                                                                               |
| 10392098 | 0.753 | 7.421  | 7.83E-04 | 2.41E-02 | -0.356 | Ftsj3     | FtsJ homolog 3 (E. coli)                                                                                                    |
| 10520506 | 0.753 | 9.522  | 8.06E-04 | 2.46E-02 | -0.384 | Kcnk3     | potassium channel, subfamily K, member 3                                                                                    |
| 10373157 | 0.753 | 8.532  | 1.49E-04 | 8.94E-03 | 1.342  | Mars      | methionine-tRNA synthetase                                                                                                  |
| 10364542 | 0.752 | 5.63   | 9.36E-04 | 2.65E-02 | -0.539 | Cfd       | complement factor D (adipsin)                                                                                               |
| 10539894 | 0.752 | 9.719  | 2.11E-03 | 4.22E-02 | -1.374 | Mgll      | monoglyceride lipase                                                                                                        |
| 10477673 | 0.752 | 7.397  | 1.07E-03 | 2.88E-02 | -0.679 | Myh7b     | myosin, heavy chain 7B, cardiac muscle, beta                                                                                |
| 10574404 | 0.752 | 7.444  | 1.90E-03 | 4.00E-02 | -1.264 | Setd6     | SET domain containing 6                                                                                                     |
| 10510509 | 0.752 | 8.362  | 2.39E-03 | 4.53E-02 | -1.5   | Gpr157    | similar to G protein-coupled receptor 157; G protein-coupled receptor 157                                                   |
| 10577030 | 0.751 | 8.668  | 2.07E-04 | 1.09E-02 | 1.008  | Cars2     | cysteinyl-tRNA synthetase 2 (mitochondrial)(putative)                                                                       |
| 10394735 | 0.751 | 8.611  | 5.23E-04 | 1.88E-02 | 0.059  | Pdia6     | similar to Protein disulfide isomerase associated 6; protein disulfide isomerase associated 6                               |
| 10448459 | 0.751 | 6.958  | 6.12E-04 | 2.06E-02 | -0.101 | Tbc1d24   | TBC1 domain family, member 24                                                                                               |
| 10470427 | 0.751 | 7.881  | 1.60E-03 | 3.62E-02 | -1.088 | Wdr5      | WD repeat domain 5                                                                                                          |
| 10443482 | 0.75  | 9.586  | 6.64E-04 | 2.17E-02 | -0.185 | BC004004  | cDNA sequence BC004004                                                                                                      |
| 10547789 | 0.75  | 10.064 | 4.85E-05 | 4.81E-03 | 2.482  | Grcc10    | gene rich cluster, C10 gene                                                                                                 |
| 10358726 | 0.75  | 7.757  | 1.27E-03 | 3.15E-02 | -0.848 | Tsen15    | tRNA splicing endonuclease 15 homolog (S. cerevisiae)                                                                       |
| 10415132 | 0.749 | 5.629  | 3.77E-04 | 1.57E-02 | 0.396  | Cmtm5     | CKLF-like MARVEL transmembrane domain containing 5                                                                          |
| 10597470 | 0.749 | 7.363  | 1.61E-03 | 3.63E-02 | -1.097 | Cmtm8     | CKLF-like MARVEL transmembrane domain containing 8                                                                          |
| 10530819 | 0.749 | 10.266 | 1.18E-03 | 3.01E-02 | -0.773 | Hopx      | HOP homeobox                                                                                                                |
| 10383389 | 0.749 | 9.919  | 2.86E-04 | 1.32E-02 | 0.679  | Mrpl12    | mitochondrial ribosomal protein L12                                                                                         |
| 10509002 | 0.749 | 6.724  | 2.41E-04 | 1.18E-02 | 0.855  | Rhd       | Rh blood group, D antigen                                                                                                   |
| 10445338 | 0.748 | 8.092  | 1.94E-03 | 4.04E-02 | -1.29  | Enpp5     | ectonucleotide pyrophosphatase/phosphodiesterase 5                                                                          |
| 10431030 | 0.748 | 7.855  | 2.59E-04 | 1.24E-02 | 0.78   | Mcat      | similar to mitochondrial malonyltransferase isoform b precursor; malonyl CoA:ACP acyltransferase (mitochondrial)            |
| 10467162 | 0.748 | 9.983  | 2.77E-03 | 4.96E-02 | -1.652 | Pank1     | pantothenate kinase 1                                                                                                       |
| 10606102 | 0.748 | 8.727  | 3.51E-05 | 4.00E-03 | 2.804  | Phka1     | phosphorylase kinase alpha 1                                                                                                |

|          |       |        |          |          |        |               |                                                                                                                                                                                                                                                                                                                                                                                                       |
|----------|-------|--------|----------|----------|--------|---------------|-------------------------------------------------------------------------------------------------------------------------------------------------------------------------------------------------------------------------------------------------------------------------------------------------------------------------------------------------------------------------------------------------------|
| 10502982 | 0.748 | 10.687 | 6.32E-04 | 2.12E-02 | -0.135 | Tnni3k        | TNNI3 interacting kinase                                                                                                                                                                                                                                                                                                                                                                              |
| 10542592 | 0.747 | 6.073  | 1.54E-04 | 9.14E-03 | 1.312  | Gm10400       | predicted gene 10400<br>hypothetical protein LOC100038909; similar to PIRA2;<br>hypothetical protein LOC100038908; predicted gene 15448;<br>paired-Ig-like receptor A11; paired-Ig-like receptor A5; paired-Ig-<br>like receptor A6; paired-Ig-like receptor A4; paired-Ig-like<br>receptor A7; predicted gene 15930; paired-Ig-like receptor A1;<br>paired-Ig-like receptor A2; predicted gene 10693 |
| 10559478 | 0.747 | 4.764  | 2.11E-03 | 4.21E-02 | -1.372 | Gm14548       | latrophilin 3                                                                                                                                                                                                                                                                                                                                                                                         |
| 10522749 | 0.747 | 5.714  | 4.09E-04 | 1.65E-02 | 0.312  | Lphn3         | nicotinamide nucleotide adenylyltransferase 1                                                                                                                                                                                                                                                                                                                                                         |
| 10518679 | 0.747 | 9.546  | 2.07E-03 | 4.17E-02 | -1.352 | Nmnat1        | Williams-Beuren syndrome chromosome region 17 homolog<br>(human); similar to UDP-GalNAc:polypeptide N-<br>acetylgalactosaminyltransferase-like 3                                                                                                                                                                                                                                                      |
| 10534152 | 0.747 | 6.447  | 2.02E-04 | 1.08E-02 | 1.034  | Wbscr17       | insulin-like growth factor binding protein, acid labile subunit                                                                                                                                                                                                                                                                                                                                       |
| 10442625 | 0.746 | 5.915  | 4.62E-04 | 1.76E-02 | 0.188  | Igfals        | NADH dehydrogenase (ubiquinone) 1, alpha/beta subcomplex, 1;<br>predicted gene 4459                                                                                                                                                                                                                                                                                                                   |
| 10567657 | 0.746 | 8.894  | 3.59E-04 | 1.53E-02 | 0.445  | Ndufab1       | palmitoyl-protein thioesterase 2                                                                                                                                                                                                                                                                                                                                                                      |
| 10450226 | 0.746 | 8.427  | 1.55E-04 | 9.18E-03 | 1.303  | Ppt2          | asparaginase like 1                                                                                                                                                                                                                                                                                                                                                                                   |
| 10465844 | 0.745 | 8.23   | 6.73E-04 | 2.19E-02 | -0.2   | Asrgl1        | carboxymethylenebutenolidase-like (Pseudomonas)                                                                                                                                                                                                                                                                                                                                                       |
| 10423505 | 0.745 | 8.702  | 8.55E-04 | 2.54E-02 | -0.446 | Cmbl          | inositol polyphosphate-4-phosphatase, type II                                                                                                                                                                                                                                                                                                                                                         |
| 10573082 | 0.745 | 8.056  | 1.87E-03 | 3.95E-02 | -1.25  | Inpp4b        | importin 13                                                                                                                                                                                                                                                                                                                                                                                           |
| 10515536 | 0.745 | 9.067  | 3.54E-05 | 4.00E-03 | 2.797  | Ipo13         | mitochondrial ribosomal protein L14                                                                                                                                                                                                                                                                                                                                                                   |
| 10445430 | 0.745 | 8.718  | 1.61E-03 | 3.63E-02 | -1.099 | Mrpl14        | phosphoinositide-3-kinase, class 2, beta polypeptide                                                                                                                                                                                                                                                                                                                                                  |
| 10349834 | 0.745 | 8.718  | 1.83E-03 | 3.90E-02 | -1.229 | Pik3c2b       | thyroid hormone receptor beta                                                                                                                                                                                                                                                                                                                                                                         |
| 10412882 | 0.745 | 7.194  | 6.68E-04 | 2.18E-02 | -0.192 | Thrb          | methionine aminopeptidase-like 1                                                                                                                                                                                                                                                                                                                                                                      |
| 10472794 | 0.745 | 7.858  | 5.86E-04 | 2.02E-02 | -0.058 | Metap1        | RIKEN cDNA 2310067B10Rik                                                                                                                                                                                                                                                                                                                                                                              |
| 10382573 | 0.744 | 10.099 | 4.60E-04 | 1.76E-02 | 0.191  | 2310067B10Rik | cytokine induced apoptosis inhibitor 1                                                                                                                                                                                                                                                                                                                                                                |
| 10580771 | 0.744 | 9.796  | 5.21E-04 | 1.88E-02 | 0.064  | Ciapin1       | polycystic kidney disease (polycystin) and REJ (sperm receptor<br>for egg jelly, sea urchin homolog)-like                                                                                                                                                                                                                                                                                             |
| 10431226 | 0.744 | 5.189  | 5.85E-04 | 2.02E-02 | -0.055 | Pkdrej        | secretoglobin, family 3A, member 1                                                                                                                                                                                                                                                                                                                                                                    |
| 10375608 | 0.744 | 6.81   | 2.17E-03 | 4.28E-02 | -1.403 | Scgb3a1       | dehydrogenase/reductase (SDR family) member 1                                                                                                                                                                                                                                                                                                                                                         |
| 10339814 | 0.744 | 9.851  | 2.57E-03 | 4.74E-02 | -1.575 | Dhrs1         | heparan sulfate (glucosamine) 3-O-sulfotransferase 5                                                                                                                                                                                                                                                                                                                                                  |
| 10362513 | 0.743 | 5.6    | 4.39E-04 | 1.72E-02 | 0.241  | Hs3st5        | ENSMUSG00000064741; ENSMUSG00000075876;<br>ENSMUSG00000075924; ENSMUSG00000064791                                                                                                                                                                                                                                                                                                                     |
| 10567171 | 0.743 | 5.44   | 2.08E-03 | 4.19E-02 | -1.361 | Rps13         | tafazzin                                                                                                                                                                                                                                                                                                                                                                                              |
| 10600357 | 0.743 | 9.433  | 4.53E-04 | 1.75E-02 | 0.206  | Taz           | butyrophilin-like 9                                                                                                                                                                                                                                                                                                                                                                                   |
| 10385542 | 0.742 | 8.553  | 1.12E-03 | 2.95E-02 | -0.724 | Btnl9         | CD28 antigen; similar to CD28 antigen                                                                                                                                                                                                                                                                                                                                                                 |
| 10346783 | 0.742 | 6.134  | 6.50E-04 | 2.16E-02 | -0.164 | Cd28          | corticotropin releasing hormone receptor 2                                                                                                                                                                                                                                                                                                                                                            |
| 10544913 | 0.742 | 8.208  | 6.28E-05 | 5.71E-03 | 2.221  | Crhr2         | formin-like 1                                                                                                                                                                                                                                                                                                                                                                                         |
| 10381708 | 0.742 | 7.54   | 1.35E-04 | 8.48E-03 | 1.444  | Fmnl1         | histone cluster 2, H3b; histone cluster 1, H3f; histone cluster 1,<br>H3e; histone cluster 2, H3c1; histone cluster 1, H3d; histone<br>cluster 1, H3c; histone cluster 1, H3b; histone cluster 2, H3c2;<br>histone cluster 2, H2aa1; histone cluster 2, H2aa2                                                                                                                                         |
| 10500329 | 0.742 | 10.611 | 1.57E-03 | 3.59E-02 | -1.073 | Hist2h3c1     | microtubule-associated protein 1 light chain 3 alpha                                                                                                                                                                                                                                                                                                                                                  |
| 10477637 | 0.742 | 10.068 | 1.66E-03 | 3.69E-02 | -1.128 | Map1lc3a      | NOL1/NOP2/Sun domain family, member 4                                                                                                                                                                                                                                                                                                                                                                 |
| 10515242 | 0.742 | 8.325  | 1.44E-04 | 8.82E-03 | 1.381  | Nsun4         |                                                                                                                                                                                                                                                                                                                                                                                                       |

|          |       |        |          |          |        |               |                                                                                                                                                                                                                                                            |
|----------|-------|--------|----------|----------|--------|---------------|------------------------------------------------------------------------------------------------------------------------------------------------------------------------------------------------------------------------------------------------------------|
| 10510162 | 0.742 | 10.433 | 1.30E-04 | 8.31E-03 | 1.486  | Ppp2r5a       | predicted gene 3353; predicted gene 13142; predicted gene 13169; similar to protein phosphatase 2, regulatory subunit B (B56), alpha isoform; predicted gene 13244; predicted gene 13233; protein phosphatase 2, regulatory subunit B (B56), alpha isoform |
| 10364571 | 0.742 | 8.693  | 3.25E-04 | 1.43E-02 | 0.548  | Wdr18         | WD repeat domain 18                                                                                                                                                                                                                                        |
| 10554819 | 0.741 | 8.869  | 2.04E-04 | 1.08E-02 | 1.023  | Me3           | malic enzyme 3, NADP(+)-dependent, mitochondrial                                                                                                                                                                                                           |
| 10368935 | 0.741 | 8.54   | 2.20E-03 | 4.31E-02 | -1.417 | Qrs1          | glutamyl-tRNA synthase (glutamine-hydrolyzing)-like 1                                                                                                                                                                                                      |
| 10410995 | 0.741 | 6.296  | 2.51E-03 | 4.68E-02 | -1.551 | Rasgrf2       | RAS protein-specific guanine nucleotide-releasing factor 2                                                                                                                                                                                                 |
| 10446553 | 0.741 | 6.009  | 1.08E-03 | 2.89E-02 | -0.683 | Epb41i1       | erythrocyte protein band 4.1-like 3                                                                                                                                                                                                                        |
| 10537157 | 0.74  | 10.106 | 1.51E-03 | 3.52E-02 | -1.033 | Akr1b10       | RIKEN cDNA 2310005E10 gene                                                                                                                                                                                                                                 |
| 10473754 | 0.74  | 7.708  | 8.20E-04 | 2.49E-02 | -0.402 | Kbtbd4        | kelch repeat and BTB (POZ) domain containing 4                                                                                                                                                                                                             |
| 10587748 | 0.739 | 7.556  | 1.00E-03 | 2.77E-02 | -0.611 | Adamts7       | a disintegrin-like and metalloproteinase (reprolysin type) with thrombospondin type 1 motif, 7                                                                                                                                                             |
| 10434224 | 0.739 | 5.542  | 1.40E-03 | 3.35E-02 | -0.953 | Gnb1l         | guanine nucleotide binding protein (G protein), beta polypeptide 1-like; similar to mKIAA1645 protein                                                                                                                                                      |
| 10435752 | 0.739 | 5.958  | 1.93E-03 | 4.03E-02 | -1.283 | Lsamp         | limbic system-associated membrane protein                                                                                                                                                                                                                  |
| 10381462 | 0.739 | 7.886  | 2.30E-03 | 4.44E-02 | -1.462 | Rdm1          | RAD52 motif 1                                                                                                                                                                                                                                              |
| 10408616 | 0.739 | 7.406  | 1.69E-04 | 9.60E-03 | 1.215  | Slc22a23      | solute carrier family 22, member 23                                                                                                                                                                                                                        |
| 10474241 | 0.738 | 5.728  | 3.62E-04 | 1.53E-02 | 0.437  | ---           | ENSMUSG00000082379                                                                                                                                                                                                                                         |
| 10502951 | 0.738 | 12.789 | 1.24E-04 | 8.18E-03 | 1.53   | Acadm         | acyl-Coenzyme A dehydrogenase, medium chain                                                                                                                                                                                                                |
| 10424979 | 0.738 | 6.381  | 1.37E-03 | 3.31E-02 | -0.929 | Gpt           | glutamic pyruvic transaminase, soluble                                                                                                                                                                                                                     |
| 10434664 | 0.738 | 11.693 | 2.32E-03 | 4.45E-02 | -1.473 | Ndufa11       | predicted gene 4943                                                                                                                                                                                                                                        |
| 10588028 | 0.737 | 6.737  | 6.16E-04 | 2.08E-02 | -0.109 | Nmnat3        | nicotinamide nucleotide adenylyltransferase 3                                                                                                                                                                                                              |
| 10565819 | 0.737 | 6.892  | 3.71E-04 | 1.56E-02 | 0.413  | Slco2b1       | solute carrier organic anion transporter family, member 2b1                                                                                                                                                                                                |
| 10593842 | 0.737 | 10.384 | 4.77E-04 | 1.79E-02 | 0.154  | Tspan3        | tetraspanin 3                                                                                                                                                                                                                                              |
| 10573566 | 0.736 | 7.274  | 1.80E-04 | 1.00E-02 | 1.152  | Dhps          | deoxyhypusine synthase                                                                                                                                                                                                                                     |
| 10475643 | 0.736 | 5.033  | 2.01E-03 | 4.12E-02 | -1.326 | Fgf7          | fibroblast growth factor 7                                                                                                                                                                                                                                 |
| 10480921 | 0.736 | 7.522  | 6.83E-04 | 2.21E-02 | -0.214 | Qsox2         | quiescin Q6 sulfhydryl oxidase 2                                                                                                                                                                                                                           |
| 10569456 | 0.735 | 8.101  | 9.45E-04 | 2.66E-02 | -0.548 | ---           | ENSMUSG00000065118                                                                                                                                                                                                                                         |
| 10400030 | 0.735 | 10.493 | 1.61E-05 | 2.71E-03 | 3.577  | Bzw2          | basic leucine zipper and W2 domains 2                                                                                                                                                                                                                      |
| 10458731 | 0.735 | 8.418  | 5.67E-04 | 1.98E-02 | -0.024 | Mcc           | mutated in colorectal cancers                                                                                                                                                                                                                              |
| 10445607 | 0.735 | 7.576  | 1.84E-04 | 1.01E-02 | 1.129  | Pex6          | peroxisomal biogenesis factor 6                                                                                                                                                                                                                            |
| 10426180 | 0.735 | 9.032  | 5.88E-04 | 2.02E-02 | -0.061 | Ppp6r2        | SAPS domain family, member 2                                                                                                                                                                                                                               |
| 10572730 | 0.735 | 6.691  | 2.55E-03 | 4.73E-02 | -1.568 | Zfp617        | zinc finger protein 617                                                                                                                                                                                                                                    |
| 10497481 | 0.734 | 9.37   | 2.68E-03 | 4.87E-02 | -1.618 | 2810416G20Rik | hypothetical protein LOC100046169; RIKEN cDNA 2810416G20 gene                                                                                                                                                                                              |
| 10538459 | 0.734 | 10.782 | 3.45E-04 | 1.50E-02 | 0.487  | Aqp1          | aquaporin 1                                                                                                                                                                                                                                                |
| 10502335 | 0.734 | 5.62   | 1.05E-03 | 2.85E-02 | -0.66  | Bank1         | B-cell scaffold protein with ankyrin repeats 1                                                                                                                                                                                                             |
| 10404132 | 0.734 | 6.785  | 5.87E-04 | 2.02E-02 | -0.059 | Cmah          | cytidine monophospho-N-acetylneuraminic acid hydroxylase                                                                                                                                                                                                   |
| 10566026 | 0.734 | 7.991  | 8.53E-05 | 6.68E-03 | 1.912  | Folr2         | folate receptor 2 (fetal)                                                                                                                                                                                                                                  |
| 10466771 | 0.734 | 7.212  | 3.15E-04 | 1.40E-02 | 0.581  | Fxn           | frataxin                                                                                                                                                                                                                                                   |
| 10462281 | 0.734 | 11.25  | 6.14E-05 | 5.65E-03 | 2.244  | Vldlr         | very low density lipoprotein receptor                                                                                                                                                                                                                      |
| 10390780 | 0.733 | 8.832  | 1.46E-04 | 8.83E-03 | 1.366  | Krt222        | keratin 222                                                                                                                                                                                                                                                |

|          |       |        |          |          |        |               |                                                                                                                                        |
|----------|-------|--------|----------|----------|--------|---------------|----------------------------------------------------------------------------------------------------------------------------------------|
| 10529895 | 0.733 | 9.137  | 1.17E-03 | 3.01E-02 | -0.771 | Qdpr          | quinoid dihydropteridine reductase; similar to Quinoid dihydropteridine reductase                                                      |
| 10410695 | 0.733 | 8.481  | 7.05E-04 | 2.26E-02 | -0.247 | Rhobtb3       | Rho-related BTB domain containing 3                                                                                                    |
| 10442435 | 0.733 | 9.158  | 1.65E-03 | 3.67E-02 | -1.12  | Rnps1         | hypothetical protein LOC100044797; ribonucleic acid binding protein S1; predicted gene 9825                                            |
| 10511416 | 0.733 | 5.579  | 1.30E-04 | 8.31E-03 | 1.484  | Tox           | thymocyte selection-associated high mobility group box; similar to thymus high mobility group box protein TOX                          |
| 10387201 | 0.732 | 7.865  | 2.34E-04 | 1.16E-02 | 0.884  | Arhgef15      | Rho guanine nucleotide exchange factor (GEF) 15                                                                                        |
| 10361152 | 0.732 | 7.217  | 3.59E-04 | 1.53E-02 | 0.447  | Gstp2         | glutathione S-transferase, pi 2; glutathione S-transferase, pi 1; similar to glutathione S-transferase pi class A; predicted gene 3934 |
| 10577882 | 0.732 | 8.627  | 3.47E-05 | 3.99E-03 | 2.818  | Hgsnat        | heparan-alpha-glucosaminide N-acetyltransferase                                                                                        |
| 10488322 | 0.732 | 9.384  | 4.57E-05 | 4.69E-03 | 2.54   | Ralgapa2      | RIKEN cDNA A230067G21 gene                                                                                                             |
| 10546538 | 0.732 | 8.87   | 7.68E-04 | 2.39E-02 | -0.335 | Suclg2        | succinate-Coenzyme A ligase, GDP-forming, beta subunit                                                                                 |
| 10342892 | 0.732 | 9.387  | 1.62E-04 | 9.37E-03 | 1.258  | C19orf42      | RIKEN cDNA 9130011J15 gene                                                                                                             |
| 10586110 | 0.731 | 8.94   | 4.52E-05 | 4.67E-03 | 2.552  | Cln6          | ceroid-lipofuscinosis, neuronal 6                                                                                                      |
| 10427496 | 0.731 | 6.682  | 1.49E-04 | 8.90E-03 | 1.348  | Egflam        | EGF-like, fibronectin type III and laminin G domains                                                                                   |
| 10373367 | 0.731 | 11.147 | 3.19E-04 | 1.41E-02 | 0.568  | Coq10A        | coenzyme Q10 homolog A (yeast)                                                                                                         |
| 10519527 | 0.73  | 7.781  | 1.37E-03 | 3.31E-02 | -0.932 | Abcb1a        | ATP-binding cassette, sub-family B (MDR/TAP), member 1A                                                                                |
| 10564698 | 0.73  | 7.428  | 1.21E-03 | 3.06E-02 | -0.802 | Det1          | de-etiolated homolog 1 (Arabidopsis)                                                                                                   |
| 10566564 | 0.73  | 8.266  | 5.46E-04 | 1.94E-02 | 0.015  | Mrpl17        | mitochondrial ribosomal protein L17                                                                                                    |
| 10412385 | 0.73  | 6.958  | 9.96E-04 | 2.76E-02 | -0.603 | Mrps30        | mitochondrial ribosomal protein S30                                                                                                    |
| 10395807 | 0.729 | 8.661  | 4.76E-05 | 4.79E-03 | 2.501  | 1110008L16Rik | RIKEN cDNA 1110008L16 gene                                                                                                             |
| 10571657 | 0.729 | 12.053 | 1.69E-04 | 9.58E-03 | 1.218  | Acs1          | acyl-CoA synthetase long-chain family member 1                                                                                         |
| 10597627 | 0.729 | 9.504  | 1.31E-04 | 8.35E-03 | 1.473  | Oxsr1         | oxidative-stress responsive 1                                                                                                          |
| 10587871 | 0.729 | 8.937  | 7.35E-04 | 2.33E-02 | -0.29  | Paqr9         | progesterin and adipoQ receptor family member IX                                                                                       |
| 10575102 | 0.728 | 8.82   | 8.44E-05 | 6.67E-03 | 1.922  | Cirh1a        | cirrhosis, autosomal recessive 1A (human)                                                                                              |
| 10481574 | 0.728 | 8.029  | 2.10E-03 | 4.21E-02 | -1.37  | Fam78a        | family with sequence similarity 78, member A; hypothetical protein LOC100047386                                                        |
| 10402808 | 0.728 | 8.059  | 6.87E-04 | 2.22E-02 | -0.22  | Jag2          | jagged 2                                                                                                                               |
| 10410393 | 0.728 | 7.595  | 1.82E-04 | 1.00E-02 | 1.144  | Mtrr          | 5-methyltetrahydrofolate-homocysteine methyltransferase reductase                                                                      |
| 10361023 | 0.728 | 9.094  | 1.94E-03 | 4.04E-02 | -1.29  | Prox1         | prospero-related homeobox 1                                                                                                            |
| 10357220 | 0.728 | 7.87   | 5.32E-05 | 5.13E-03 | 2.388  | Tmem177       | transmembrane protein 177                                                                                                              |
| 10484207 | 0.727 | 9.914  | 7.11E-05 | 6.14E-03 | 2.096  | Ccdc141       | RIKEN cDNA 2610301F02 gene                                                                                                             |
| 10347351 | 0.727 | 9.828  | 3.33E-04 | 1.46E-02 | 0.524  | Ctdsp1        | similar to golli-interacting protein; CTD (carboxy-terminal domain, RNA polymerase II, polypeptide A) small phosphatase 1              |
| 10348889 | 0.727 | 7.669  | 1.23E-03 | 3.09E-02 | -0.816 | D2hgdh        | similar to D-2-hydroxyglutarate dehydrogenase; D-2-hydroxyglutarate dehydrogenase                                                      |
| 10440926 | 0.727 | 8.044  | 1.95E-03 | 4.05E-02 | -1.294 | Dnajc28       | DnaJ (Hsp40) homolog, subfamily C, member 28                                                                                           |
| 10583634 | 0.727 | 7.793  | 4.72E-04 | 1.78E-02 | 0.165  | Qtrt1         | queueine tRNA-ribosyltransferase 1                                                                                                     |
| 10446235 | 0.727 | 9.289  | 1.63E-04 | 9.38E-03 | 1.253  | Trip10        | thyroid hormone receptor interactor 10                                                                                                 |
| 10375240 | 0.726 | 11.39  | 2.36E-04 | 1.17E-02 | 0.875  | Hspd1         | predicted gene 12141; heat shock protein 1 (chaperonin)                                                                                |
| 10491621 | 0.725 | 8.787  | 5.63E-04 | 1.97E-02 | -0.016 | 4932438A13Rik | RIKEN cDNA 4932438A13 gene                                                                                                             |
| 10376596 | 0.725 | 10.315 | 1.13E-03 | 2.95E-02 | -0.728 | 4933439F18Rik | RIKEN cDNA 4933439F18 gene                                                                                                             |



|          |       |        |          |          |        |               |                                                                                                                                                                                                        |
|----------|-------|--------|----------|----------|--------|---------------|--------------------------------------------------------------------------------------------------------------------------------------------------------------------------------------------------------|
| 10483679 | 0.725 | 8.484  | 8.51E-05 | 6.68E-03 | 1.913  | Gpr155        | G protein-coupled receptor 155                                                                                                                                                                         |
| 10548047 | 0.725 | 5.635  | 1.19E-03 | 3.03E-02 | -0.786 | Kcna1         | potassium voltage-gated channel, shaker-related subfamily, member 1                                                                                                                                    |
| 10344011 | 0.725 | 10.871 | 7.81E-04 | 2.41E-02 | -0.353 | Psap11        | prosaposin                                                                                                                                                                                             |
| 10565935 | 0.724 | 8.409  | 4.90E-04 | 1.82E-02 | 0.126  | Arhgef17      | Rho guanine nucleotide exchange factor (GEF) 17                                                                                                                                                        |
| 10467842 | 0.724 | 12.838 | 1.47E-04 | 8.83E-03 | 1.359  | Got1          | similar to Aspartate aminotransferase, cytoplasmic (Transaminase A) (Glutamate oxaloacetate transaminase 1); glutamate oxaloacetate transaminase 1, soluble                                            |
| 10420385 | 0.724 | 8.197  | 7.45E-05 | 6.34E-03 | 2.049  | N6amt2        | N-6 adenine-specific DNA methyltransferase 2 (putative)                                                                                                                                                |
| 10571302 | 0.724 | 9.535  | 8.29E-06 | 1.96E-03 | 4.229  | Tmem66        | transmembrane protein 66                                                                                                                                                                               |
| 10341992 | 0.724 | 8.773  | 1.55E-03 | 3.58E-02 | -1.06  | Hdac5         | histone deacetylase 5                                                                                                                                                                                  |
| 10590972 | 0.724 | 10.965 | 9.61E-05 | 7.10E-03 | 1.791  | Mst1          | predicted gene 6097; macrophage migration inhibitory factor; similar to macrophage migration inhibitory factor; predicted gene 8762; predicted gene 10169; macrophage migration inhibitory factor-like |
| 10503584 | 0.723 | 10.621 | 2.12E-03 | 4.23E-02 | -1.38  | Coq3          | coenzyme Q3 homolog, methyltransferase (yeast)                                                                                                                                                         |
| 10481474 | 0.723 | 11.97  | 2.29E-05 | 3.29E-03 | 3.23   | Crat          | carnitine acetyltransferase                                                                                                                                                                            |
| 10367440 | 0.723 | 9.639  | 5.94E-04 | 2.04E-02 | -0.072 | Itga7         | integrin alpha 7                                                                                                                                                                                       |
| 10437364 | 0.722 | 8.076  | 2.27E-05 | 3.27E-03 | 3.242  | Adcy9         | adenylate cyclase 9                                                                                                                                                                                    |
| 10412773 | 0.722 | 7.623  | 2.94E-05 | 3.77E-03 | 2.982  | Slc4a7        | solute carrier family 4, sodium bicarbonate cotransporter, member 7                                                                                                                                    |
| 10430319 | 0.722 | 7.565  | 1.15E-03 | 2.97E-02 | -0.747 | Tst           | thiosulfate sulfurtransferase, mitochondrial                                                                                                                                                           |
| 10559568 | 0.721 | 6.282  | 2.53E-05 | 3.49E-03 | 3.133  | 6030429G01Rik | RIKEN cDNA 6030429G01 gene                                                                                                                                                                             |
| 10358389 | 0.721 | 9.07   | 1.60E-04 | 9.29E-03 | 1.275  | Rgs2          | regulator of G-protein signaling 2                                                                                                                                                                     |
| 10341699 | 0.721 | 11.702 | 1.24E-04 | 8.18E-03 | 1.531  | Canx          | calnexin                                                                                                                                                                                               |
| 10604637 | 0.72  | 9.681  | 2.66E-04 | 1.26E-02 | 0.753  | Cxx1c         | CAAX box 1 homolog A (human); CAAX box 1 homolog B (human); similar to mammalian retrotransposon derived 8b                                                                                            |
| 10456727 | 0.72  | 10.215 | 3.34E-05 | 3.93E-03 | 2.854  | Dym           | dymeclin                                                                                                                                                                                               |
| 10565152 | 0.72  | 7.702  | 4.28E-04 | 1.69E-02 | 0.265  | Homer2        | RIKEN cDNA 9330120H11 gene                                                                                                                                                                             |
| 10582330 | 0.72  | 8.684  | 4.85E-04 | 1.81E-02 | 0.137  | Rnf166        | ring finger protein 166                                                                                                                                                                                |
| 10569870 | 0.719 | 5.301  | 2.87E-05 | 3.70E-03 | 3.008  | Retn          | resistin                                                                                                                                                                                               |
| 10387791 | 0.719 | 7.144  | 4.58E-04 | 1.76E-02 | 0.197  | Slc16a13      | solute carrier family 16 (monocarboxylic acid transporters), member 13                                                                                                                                 |
| 10488482 | 0.718 | 11.833 | 3.17E-04 | 1.40E-02 | 0.574  | Acss1         | acyl-CoA synthetase short-chain family member 1                                                                                                                                                        |
| 10553015 | 0.718 | 9.585  | 1.23E-05 | 2.45E-03 | 3.846  | Bcat2         | branched chain aminotransferase 2, mitochondrial                                                                                                                                                       |
| 10581865 | 0.718 | 7.855  | 4.23E-04 | 1.68E-02 | 0.278  | Ldhd          | lactate dehydrogenase D                                                                                                                                                                                |
| 10541695 | 0.718 | 9.874  | 4.29E-05 | 4.56E-03 | 2.604  | Lpcat3        | lysophosphatidylcholine acyltransferase 3                                                                                                                                                              |
| 10443391 | 0.717 | 9.442  | 1.47E-04 | 8.83E-03 | 1.361  | Mapk14        | mitogen-activated protein kinase 14                                                                                                                                                                    |
| 10420216 | 0.717 | 9.711  | 9.54E-05 | 7.10E-03 | 1.798  | Sdr39u1       | short chain dehydrogenase/reductase family 39U, member 1                                                                                                                                               |
| 10530319 | 0.716 | 9.092  | 1.29E-04 | 8.31E-03 | 1.49   | Atp8a1        | ATPase, aminophospholipid transporter (APLT), class I, type 8A, member 1                                                                                                                               |
| 10517600 | 0.715 | 11.183 | 2.04E-04 | 1.08E-02 | 1.025  | Pink1         | PTEN induced putative kinase 1                                                                                                                                                                         |
| 10535369 | 0.715 | 9.767  | 1.83E-04 | 1.01E-02 | 1.134  | Gm15770       | predicted gene 15770                                                                                                                                                                                   |
| 10469581 | 0.714 | 8.079  | 2.71E-03 | 4.89E-02 | -1.63  | Etl4          | enhancer trap locus 4                                                                                                                                                                                  |

|          |       |        |          |          |        |               |                                                                                                                                                                                                        |
|----------|-------|--------|----------|----------|--------|---------------|--------------------------------------------------------------------------------------------------------------------------------------------------------------------------------------------------------|
| 10558910 | 0.714 | 9.29   | 1.62E-03 | 3.63E-02 | -1.1   | Rangrf        | predicted gene 7791; similar to Ran-interacting protein MOG1; predicted gene 15711; RAN guanine nucleotide release factor; predicted gene 4535; predicted gene 8572                                    |
| 10589166 | 0.714 | 6.973  | 2.47E-04 | 1.20E-02 | 0.827  | Slc26a6       | solute carrier family 26, member 6                                                                                                                                                                     |
| 10431282 | 0.713 | 8.554  | 3.14E-04 | 1.40E-02 | 0.583  | 2810001A02Rik | RIKEN cDNA 2810001A02 gene                                                                                                                                                                             |
| 10354732 | 0.713 | 10.737 | 2.32E-04 | 1.16E-02 | 0.894  | Hspd1         | predicted gene 12141; heat shock protein 1 (chaperonin)                                                                                                                                                |
| 10544660 | 0.713 | 8.467  | 8.84E-04 | 2.58E-02 | -0.48  | Osbpl3        | oxysterol binding protein-like 3                                                                                                                                                                       |
| 10506188 | 0.713 | 10.19  | 9.66E-06 | 2.16E-03 | 4.08   | Pgm2          | phosphoglucomutase 2                                                                                                                                                                                   |
| 10524659 | 0.713 | 6.061  | 9.98E-05 | 7.21E-03 | 1.753  | Pop5          | processing of precursor 5, ribonuclease P/MRP family (S. cerevisiae)                                                                                                                                   |
| 10571128 | 0.713 | 8.987  | 3.49E-04 | 1.50E-02 | 0.476  | Prosc         | proline synthetase co-transcribed                                                                                                                                                                      |
| 10342913 | 0.713 | 7.602  | 1.11E-04 | 7.65E-03 | 1.645  | Gbf1          | golgi-specific brefeldin A-resistance factor 1                                                                                                                                                         |
| 10438517 | 0.712 | 9.333  | 2.67E-03 | 4.86E-02 | -1.615 | Alg3          | asparagine-linked glycosylation 3 homolog (yeast, alpha-1,3-mannosyltransferase)                                                                                                                       |
| 10484197 | 0.712 | 10.558 | 4.83E-05 | 4.81E-03 | 2.486  | Ccdc141       | RIKEN cDNA 2610301F02 gene                                                                                                                                                                             |
| 10351347 | 0.712 | 10.939 | 3.70E-04 | 1.56E-02 | 0.414  | Creg1         | cellular repressor of E1A-stimulated genes 1                                                                                                                                                           |
| 10600936 | 0.712 | 8.015  | 3.90E-04 | 1.60E-02 | 0.362  | Efnb1         | ephrin B1                                                                                                                                                                                              |
| 10502205 | 0.712 | 12.699 | 1.74E-05 | 2.79E-03 | 3.501  | Hadh          | hydroxyacyl-Coenzyme A dehydrogenase                                                                                                                                                                   |
| 10575685 | 0.712 | 9.376  | 6.88E-04 | 2.22E-02 | -0.221 | Nudt7         | nudix (nucleoside diphosphate linked moiety X)-type motif 7                                                                                                                                            |
| 10608676 | 0.712 | 7.782  | 1.56E-04 | 9.19E-03 | 1.297  | L2hgdh        | L-2-hydroxyglutarate dehydrogenase; predicted gene 7842                                                                                                                                                |
| 10574232 | 0.711 | 11.678 | 5.67E-05 | 5.30E-03 | 2.325  | Coq9          | coenzyme Q9 homolog (yeast)                                                                                                                                                                            |
| 10474836 | 0.71  | 10.794 | 4.89E-05 | 4.83E-03 | 2.472  | Ivd           | isovaleryl coenzyme A dehydrogenase                                                                                                                                                                    |
| 10531191 | 0.709 | 6.795  | 1.63E-03 | 3.64E-02 | -1.108 | Adamts3       | a disintegrin-like and metallopeptidase (reprolysin type) with thrombospondin type 1 motif, 3                                                                                                          |
| 10446207 | 0.709 | 9.856  | 2.40E-05 | 3.38E-03 | 3.186  | Clpp          | caseinolytic peptidase, ATP-dependent, proteolytic subunit homolog (E. coli)                                                                                                                           |
| 10411107 | 0.709 | 10.355 | 6.77E-05 | 5.98E-03 | 2.145  | Cmya5         | cardiomyopathy associated 5                                                                                                                                                                            |
| 10494423 | 0.709 | 11.466 | 1.73E-05 | 2.79E-03 | 3.507  | Hfe2          | hemochromatosis type 2 (juvenile) (human homolog)                                                                                                                                                      |
| 10507833 | 0.709 | 7.904  | 8.77E-04 | 2.57E-02 | -0.472 | Nt5c1a        | 5'-nucleotidase, cytosolic IA                                                                                                                                                                          |
| 10491603 | 0.708 | 8.225  | 2.82E-04 | 1.30E-02 | 0.693  | 4932438A13Rik | RIKEN cDNA 4932438A13 gene                                                                                                                                                                             |
| 10498837 | 0.708 | 11.51  | 7.70E-05 | 6.34E-03 | 2.015  | Etfdh         | electron transferring flavoprotein, dehydrogenase                                                                                                                                                      |
| 10359908 | 0.708 | 7.35   | 2.32E-03 | 4.45E-02 | -1.473 | Rgs4          | regulator of G-protein signaling 4                                                                                                                                                                     |
| 10491623 | 0.707 | 9.418  | 1.58E-03 | 3.59E-02 | -1.074 | 4932438A13Rik | RIKEN cDNA 4932438A13 gene                                                                                                                                                                             |
| 10537742 | 0.707 | 5.145  | 3.91E-04 | 1.61E-02 | 0.359  | Clcn1         | chloride channel 1                                                                                                                                                                                     |
| 10513162 | 0.707 | 8.774  | 3.73E-04 | 1.56E-02 | 0.406  | Ptpn3         | protein tyrosine phosphatase, non-receptor type 3                                                                                                                                                      |
| 10575917 | 0.707 | 8.741  | 9.60E-04 | 2.69E-02 | -0.564 | Wfdc1         | WAP four-disulfide core domain 1                                                                                                                                                                       |
| 10465388 | 0.706 | 9.831  | 1.52E-05 | 2.67E-03 | 3.639  | Arl2          | ADP-ribosylation factor-like 2                                                                                                                                                                         |
| 10387743 | 0.706 | 11.284 | 5.47E-05 | 5.21E-03 | 2.36   | Slc2a4        | solute carrier family 2 (facilitated glucose transporter), member 4                                                                                                                                    |
| 10561063 | 0.705 | 9.452  | 3.53E-05 | 4.00E-03 | 2.8    | Bckdha        | branched chain ketoacid dehydrogenase E1, alpha polypeptide                                                                                                                                            |
| 10370021 | 0.705 | 9.395  | 2.69E-05 | 3.59E-03 | 3.07   | Mif           | predicted gene 6097; macrophage migration inhibitory factor; similar to macrophage migration inhibitory factor; predicted gene 8762; predicted gene 10169; macrophage migration inhibitory factor-like |
| 10497209 | 0.705 | 7.947  | 7.32E-05 | 6.30E-03 | 2.066  | Mrps28        | mitochondrial ribosomal protein S28                                                                                                                                                                    |

|          |       |        |          |          |        |         |                                                                           |
|----------|-------|--------|----------|----------|--------|---------|---------------------------------------------------------------------------|
| 10453373 | 0.705 | 10.74  | 8.52E-05 | 6.68E-03 | 1.912  | Prepl   | prolyl endopeptidase-like                                                 |
| 10599719 | 0.705 | 8.902  | 7.61E-05 | 6.34E-03 | 2.027  | Slc9a6  | solute carrier family 9 (sodium/hydrogen exchanger), member 6             |
| 10389701 | 0.704 | 8.608  | 9.45E-05 | 7.10E-03 | 1.808  | Akap1   | A kinase (PRKA) anchor protein 1                                          |
| 10496605 | 0.704 | 7.567  | 1.21E-05 | 2.44E-03 | 3.859  | Ccbl2   | cysteine conjugate-beta lyase 2                                           |
| 10436841 | 0.704 | 10.758 | 4.42E-04 | 1.73E-02 | 0.232  | Il10rb  | interleukin 10 receptor, beta                                             |
| 10550250 | 0.704 | 8.104  | 1.87E-05 | 2.94E-03 | 3.429  | Kptn    | kaptin                                                                    |
| 10413047 | 0.704 | 5.755  | 3.78E-04 | 1.57E-02 | 0.393  | Plau    | plasminogen activator, urokinase                                          |
| 10587534 | 0.703 | 10.02  | 3.69E-05 | 4.10E-03 | 2.755  | Bckdhb  | branched chain ketoacid dehydrogenase E1, beta polypeptide;               |
| 10456021 | 0.703 | 6.773  | 8.93E-06 | 2.07E-03 | 4.157  | Camk2a  | similar to 3-methyl-2-oxobutanoate dehydrogenase                          |
| 10601350 | 0.703 | 9.343  | 1.47E-04 | 8.83E-03 | 1.362  | Fgf16   | calcium/calmodulin-dependent protein kinase II alpha                      |
|          |       |        |          |          |        |         | fibroblast growth factor 16                                               |
|          |       |        |          |          |        |         | glutathione S-transferase, pi 2; glutathione S-transferase, pi 1;         |
|          |       |        |          |          |        |         | similar to glutathione S-transferase pi class A; predicted gene           |
| 10464583 | 0.703 | 10.592 | 5.40E-04 | 1.93E-02 | 0.027  | Gstp1   | 3934                                                                      |
| 10531869 | 0.703 | 9.352  | 5.50E-04 | 1.95E-02 | 0.007  | Mapk10  | mitogen-activated protein kinase 10                                       |
|          |       |        |          |          |        |         | coenzyme Q2 homolog, prenyltransferase (yeast); predicted gene            |
| 10531729 | 0.702 | 9.878  | 2.65E-05 | 3.54E-03 | 3.086  | Coq2    | 6728                                                                      |
|          |       |        |          |          |        |         | required for meiotic nuclear division 1 homolog ( <i>S. cerevisiae</i> ); |
|          |       |        |          |          |        |         | predicted gene 5512                                                       |
| 10461782 | 0.702 | 8.361  | 2.32E-03 | 4.45E-02 | -1.469 | Rmnd1   | capicua homolog ( <i>Drosophila</i> )                                     |
| 10342754 | 0.702 | 7.319  | 1.58E-03 | 3.59E-02 | -1.077 | Cic     | ClpB caseinolytic peptidase B homolog ( <i>E. coli</i> )                  |
| 10555550 | 0.701 | 8.596  | 3.99E-06 | 1.41E-03 | 4.933  | Clpb    | protein phosphatase 1 (formerly 2C)-like                                  |
| 10492590 | 0.701 | 8.201  | 2.23E-04 | 1.14E-02 | 0.934  | Ppm1l   | prolactin receptor                                                        |
| 10423049 | 0.701 | 4.667  | 7.63E-04 | 2.38E-02 | -0.328 | Prlr    | microsomal glutathione S-transferase 3                                    |
| 10359861 | 0.7   | 10.119 | 1.05E-04 | 7.45E-03 | 1.7    | Mgst3   | transmembrane protein 143                                                 |
| 10553140 | 0.7   | 9.146  | 1.40E-05 | 2.61E-03 | 3.714  | Tmem143 | predicted gene 9807; similar to vomeronasal receptor V1RG10;              |
| 10549990 | 0.699 | 6.669  | 1.60E-03 | 3.62E-02 | -1.088 | Gm4741  | vomeronasal 1 receptor, G10; vomeronasal 1 receptor, G10-like             |
| 10545588 | 0.699 | 9.613  | 4.25E-05 | 4.54E-03 | 2.614  | Hk2     | hexokinase 2                                                              |
|          |       |        |          |          |        |         | protein tyrosine phosphatase, receptor type, N polypeptide 2;             |
|          |       |        |          |          |        |         | similar to Protein tyrosine phosphatase, receptor type, N                 |
| 10399121 | 0.699 | 6.271  | 3.11E-05 | 3.84E-03 | 2.927  | Ptprn2  | polypeptide 2                                                             |
| 10380751 | 0.698 | 8.374  | 9.54E-05 | 7.10E-03 | 1.798  | Mrpl45  | mitochondrial ribosomal protein L45                                       |
| 10412394 | 0.698 | 11.755 | 2.30E-04 | 1.15E-02 | 0.9    | Nnt     | nicotinamide nucleotide transhydrogenase                                  |
| 10473783 | 0.698 | 7.253  | 2.73E-04 | 1.28E-02 | 0.728  | Rapsn   | receptor-associated protein of the synapse                                |
| 10561031 | 0.697 | 8.711  | 6.46E-04 | 2.15E-02 | -0.158 | Lipe    | lipase, hormone sensitive                                                 |
| 10524955 | 0.697 | 9.301  | 1.06E-04 | 7.49E-03 | 1.691  | Tesc    | tescalcin; similar to Tescalcin                                           |

|          |       |        |          |          |        |          |                                                                                                                                                                                              |
|----------|-------|--------|----------|----------|--------|----------|----------------------------------------------------------------------------------------------------------------------------------------------------------------------------------------------|
|          |       |        |          |          |        |          | ENSMUSG00000075949; ENSMUSG00000070225;                                                                                                                                                      |
|          |       |        |          |          |        |          | ENSMUSG00000075942; ENSMUSG00000075804;                                                                                                                                                      |
|          |       |        |          |          |        |          | ENSMUSG00000077556; ENSMUSG00000077350;                                                                                                                                                      |
|          |       |        |          |          |        |          | ENSMUSG00000065107; ENSMUSG00000084595;                                                                                                                                                      |
|          |       |        |          |          |        |          | ENSMUSG00000077743; ENSMUSG00000075814;                                                                                                                                                      |
|          |       |        |          |          |        |          | ENSMUSG00000075811; ENSMUSG00000084599;                                                                                                                                                      |
|          |       |        |          |          |        |          | ENSMUSG00000065102; ENSMUSG00000064631;                                                                                                                                                      |
|          |       |        |          |          |        |          | ENSMUSG00000075817; ENSMUSG00000070219;                                                                                                                                                      |
|          |       |        |          |          |        |          | ENSMUSG00000064635; ENSMUSG00000075955;                                                                                                                                                      |
|          |       |        |          |          |        |          | ENSMUSG00000064467; ENSMUSG00000064521;                                                                                                                                                      |
|          |       |        |          |          |        |          | ENSMUSG00000075820; ENSMUSG00000064770;                                                                                                                                                      |
|          |       |        |          |          |        |          | ENSMUSG00000075822; ENSMUSG00000070201;                                                                                                                                                      |
|          |       |        |          |          |        |          | ENSMUSG00000075921; ENSMUSG00000064906;                                                                                                                                                      |
|          |       |        |          |          |        |          | ENSMUSG00000070209; ENSMUSG00000064903;                                                                                                                                                      |
|          |       |        |          |          |        |          | ENSMUSG00000064455; ENSMUSG00000077437;                                                                                                                                                      |
|          |       |        |          |          |        |          | ENSMUSG00000065719; ENSMUSG00000065311;                                                                                                                                                      |
|          |       |        |          |          |        |          | ENSMUSG00000075836; ENSMUSG00000064515;                                                                                                                                                      |
|          |       |        |          |          |        |          | ENSMUSG00000077620; ENSMUSG00000075838;                                                                                                                                                      |
|          |       |        |          |          |        |          | ENSMUSG00000064519; ENSMUSG00000075931;                                                                                                                                                      |
|          |       |        |          |          |        |          | ENSMUSG00000064409; ENSMUSG00000065823;                                                                                                                                                      |
|          |       |        |          |          |        |          | ENSMUSG00000064798; ENSMUSG00000070192;                                                                                                                                                      |
|          |       |        |          |          |        |          | ENSMUSG00000084612; ENSMUSG00000077309;                                                                                                                                                      |
|          |       |        |          |          |        |          | ENSMUSG00000084613; ENSMUSG00000070199;                                                                                                                                                      |
|          |       |        |          |          |        |          | ENSMUSG00000075846; ENSMUSG00000064588;                                                                                                                                                      |
|          |       |        |          |          |        |          | ENSMUSG00000075788; ENSMUSG00000075792;                                                                                                                                                      |
|          |       |        |          |          |        |          | ENSMUSG00000077705; ENSMUSG00000075794;                                                                                                                                                      |
|          |       |        |          |          |        |          | ENSMUSG00000065005; ENSMUSG00000077706;                                                                                                                                                      |
|          |       |        |          |          |        |          | ENSMUSG00000075790; ENSMUSG00000084498;                                                                                                                                                      |
|          |       |        |          |          |        |          | ENSMUSG00000077313; ENSMUSG00000065149;                                                                                                                                                      |
|          |       |        |          |          |        |          | ENSMUSG00000084624; ENSMUSG00000084623;                                                                                                                                                      |
|          |       |        |          |          |        |          | ENSMUSG00000084492; ENSMUSG00000084491;                                                                                                                                                      |
|          |       |        |          |          |        |          | ENSMUSG00000084494; ENSMUSG00000075999;                                                                                                                                                      |
|          |       |        |          |          |        |          | ENSMUSG00000075859; ENSMUSG00000077316;                                                                                                                                                      |
|          |       |        |          |          |        |          | ENSMUSG00000075858; ENSMUSG00000075856;                                                                                                                                                      |
|          |       |        |          |          |        |          | ENSMUSG00000075799; ENSMUSG00000065691;                                                                                                                                                      |
|          |       |        |          |          |        |          | ENSMUSG00000065806; ENSMUSG00000075965;                                                                                                                                                      |
|          |       |        |          |          |        |          | ENSMUSG00000075962; ENSMUSG00000084480;                                                                                                                                                      |
|          |       |        |          |          |        |          | ENSMUSG00000075863; ENSMUSG00000075765;                                                                                                                                                      |
| 10523843 | 0.696 | 7.28   | 2.56E-03 | 4.74E-02 | -1.572 | ---      | heat shock protein 2                                                                                                                                                                         |
| 10593418 | 0.696 | 9.253  | 3.30E-06 | 1.33E-03 | 5.115  | Cryab    | similar to Glutathione S-transferase Mu 1 (GST class-mu 1) (Glutathione S-transferase GT8.7) (pmGT10) (GST 1-1); predicted gene 5562; glutathione S-transferase, mu 1 cDNA sequence BC062109 |
| 10501229 | 0.696 | 10.829 | 1.38E-03 | 3.33E-02 | -0.94  | Gstm1    | von Willebrand factor A domain containing 3A                                                                                                                                                 |
| 10531653 | 0.696 | 6.094  | 2.79E-03 | 5.00E-02 | -1.662 | Tmem150c | cysteine and tyrosine-rich protein 1                                                                                                                                                         |
| 10556962 | 0.696 | 6.195  | 9.97E-05 | 7.21E-03 | 1.754  | Vwa3a    | magnesium transporter 1                                                                                                                                                                      |
| 10440513 | 0.695 | 9.53   | 4.22E-04 | 1.68E-02 | 0.28   | Cypr1    | heat shock protein 5                                                                                                                                                                         |
| 10606301 | 0.694 | 9.132  | 2.07E-04 | 1.09E-02 | 1.011  | Magt1    |                                                                                                                                                                                              |
| 10471586 | 0.693 | 11.666 | 1.03E-05 | 2.22E-03 | 4.019  | Hspa5    |                                                                                                                                                                                              |

|          |       |        |          |          |        |               |                                                                                                                                                                                                                                                            |
|----------|-------|--------|----------|----------|--------|---------------|------------------------------------------------------------------------------------------------------------------------------------------------------------------------------------------------------------------------------------------------------------|
| 10517173 | 0.691 | 7.058  | 7.74E-05 | 6.35E-03 | 2.01   | Ccdc21        | coiled-coil domain containing 21                                                                                                                                                                                                                           |
| 10577144 | 0.691 | 9.427  | 1.62E-04 | 9.37E-03 | 1.259  | Dcun1d2       | DCN1, defective in cullin neddylation 1, domain containing 2 ( <i>S. cerevisiae</i> )                                                                                                                                                                      |
| 10345855 | 0.691 | 6.348  | 4.16E-05 | 4.47E-03 | 2.636  | Slc9a2        | solute carrier family 9 (sodium/hydrogen exchanger), member 2                                                                                                                                                                                              |
| 10502655 | 0.689 | 9.226  | 1.35E-03 | 3.27E-02 | -0.913 | Cyr61         | cysteine rich protein 61                                                                                                                                                                                                                                   |
| 10450640 | 0.689 | 9.2    | 5.18E-04 | 1.88E-02 | 0.07   | Mrps18b       | mitochondrial ribosomal protein S18B                                                                                                                                                                                                                       |
| 10517655 | 0.689 | 9.753  | 9.07E-04 | 2.62E-02 | -0.506 | Pla2g5        | phospholipase A2, group V; similar to phospholipase A2, group V                                                                                                                                                                                            |
| 10344216 | 0.689 | 9.507  | 1.23E-03 | 3.09E-02 | -0.816 | Rfk           | riboflavin kinase                                                                                                                                                                                                                                          |
| 10561008 | 0.688 | 8.421  | 1.68E-03 | 3.70E-02 | -1.14  | Ceacam1       | carcinoembryonic antigen-related cell adhesion molecule 1;                                                                                                                                                                                                 |
| 10374020 | 0.688 | 8.341  | 1.39E-04 | 8.60E-03 | 1.414  | Rhbdd3        | carcinoembryonic antigen-related cell adhesion molecule 2                                                                                                                                                                                                  |
| 10521415 | 0.687 | 7.622  | 4.95E-04 | 1.82E-02 | 0.117  | Ablim2        | rhomoid domain containing 3                                                                                                                                                                                                                                |
| 10540269 | 0.687 | 7.327  | 1.55E-03 | 3.57E-02 | -1.056 | Gpr27         | actin-binding LIM protein 2                                                                                                                                                                                                                                |
| 10401564 | 0.686 | 9.856  | 6.80E-04 | 2.20E-02 | -0.209 | 1110018G07Rik | G protein-coupled receptor 27                                                                                                                                                                                                                              |
|          |       |        |          |          |        |               | RIKEN cDNA 1110018G07 gene                                                                                                                                                                                                                                 |
|          |       |        |          |          |        |               | predicted gene 3353; predicted gene 13142; predicted gene 13169; similar to protein phosphatase 2, regulatory subunit B (B56), alpha isoform; predicted gene 13244; predicted gene 13233; protein phosphatase 2, regulatory subunit B (B56), alpha isoform |
| 10361104 | 0.686 | 10.236 | 3.31E-05 | 3.93E-03 | 2.864  | Ppp2r5a       | formation of mitochondrial complexes 1 homolog ( <i>S. cerevisiae</i> )                                                                                                                                                                                    |
| 10537394 | 0.685 | 9.381  | 5.41E-05 | 5.18E-03 | 2.371  | 1110001J03Rik | carbonic anhydrase 7                                                                                                                                                                                                                                       |
| 10574480 | 0.685 | 7.759  | 1.46E-03 | 3.45E-02 | -0.996 | Car7          | hypoxia up-regulated 1                                                                                                                                                                                                                                     |
| 10584712 | 0.685 | 8.108  | 3.31E-05 | 3.93E-03 | 2.865  | Hyou1         | hydroxysteroid dehydrogenase like 2                                                                                                                                                                                                                        |
| 10505200 | 0.684 | 10.716 | 2.49E-04 | 1.21E-02 | 0.82   | Hsdl2         | procollagen-proline, 2-oxoglutarate 4-dioxygenase (proline 4-hydroxylase), alpha II polypeptide                                                                                                                                                            |
| 10376074 | 0.684 | 7.397  | 2.38E-04 | 1.17E-02 | 0.866  | P4ha2         | peroxisomal delta3, delta2-enoyl-Coenzyme A isomerase                                                                                                                                                                                                      |
| 10408656 | 0.684 | 9.785  | 9.11E-05 | 6.93E-03 | 1.845  | Peci          | ATP-binding cassette, sub-family A (ABC1), member 12                                                                                                                                                                                                       |
| 10355343 | 0.683 | 5.442  | 1.92E-05 | 2.96E-03 | 3.407  | Abca12        | chemokine (C-X-C motif) ligand 12                                                                                                                                                                                                                          |
| 10541075 | 0.683 | 9.082  | 4.68E-05 | 4.76E-03 | 2.517  | Cxcl12        | RIKEN cDNA 4932438A13 gene                                                                                                                                                                                                                                 |
| 10491609 | 0.682 | 9.438  | 3.56E-04 | 1.52E-02 | 0.456  | 4932438A13Rik | kelch domain containing 1                                                                                                                                                                                                                                  |
| 10396079 | 0.682 | 8.628  | 5.88E-04 | 2.02E-02 | -0.061 | Klhdc1        | proteolipid protein (myelin) 1                                                                                                                                                                                                                             |
| 10601888 | 0.682 | 6.974  | 2.83E-05 | 3.70E-03 | 3.019  | Plp1          | ATP synthase, H+ transporting, mitochondrial F1 complex, epsilon subunit                                                                                                                                                                                   |
| 10490221 | 0.681 | 9.61   | 1.75E-05 | 2.79E-03 | 3.498  | Atp5e         | FK506 binding protein 4                                                                                                                                                                                                                                    |
| 10548194 | 0.681 | 9.697  | 1.32E-04 | 8.39E-03 | 1.466  | Fkbp4         | four and a half LIM domains 2                                                                                                                                                                                                                              |
| 10354247 | 0.679 | 12.133 | 1.73E-03 | 3.77E-02 | -1.167 | Fhl2          | receptor (calcitonin) activity modifying protein 3; similar to receptor activity modifying protein 3                                                                                                                                                       |
| 10374197 | 0.678 | 6.953  | 1.64E-03 | 3.65E-02 | -1.113 | Ramp3         | succinate dehydrogenase complex, subunit B, iron sulfur (Ip); similar to succinate dehydrogenase Ip subunit                                                                                                                                                |
| 10509858 | 0.678 | 11.798 | 2.04E-05 | 3.11E-03 | 3.346  | Sdhb          | arsenic (+3 oxidation state) methyltransferase                                                                                                                                                                                                             |
| 10463704 | 0.677 | 9.319  | 1.26E-03 | 3.15E-02 | -0.848 | As3mt         | aldhehyde dehydrogenase family 5, subfamily A1                                                                                                                                                                                                             |
| 10408335 | 0.676 | 7.759  | 1.22E-03 | 3.08E-02 | -0.812 | Aldh5a1       | dehydrogenase/reductase (SDR family) member 11                                                                                                                                                                                                             |
| 10389300 | 0.676 | 10.816 | 4.29E-05 | 4.56E-03 | 2.603  | Dhrs11        | transmembrane protein 25                                                                                                                                                                                                                                   |
| 10592926 | 0.676 | 8.01   | 4.06E-05 | 4.43E-03 | 2.659  | Tmem25        | chemokine (C-C motif) ligand 24                                                                                                                                                                                                                            |
| 10534493 | 0.675 | 5.25   | 1.40E-05 | 2.61E-03 | 3.72   | Ccl24         | predicted gene 4980                                                                                                                                                                                                                                        |
| 10565815 | 0.675 | 7.735  | 2.73E-05 | 3.61E-03 | 3.056  | Gm4980        |                                                                                                                                                                                                                                                            |

|          |       |        |          |          |        |               |                                                                                                                                                                                                                                                                                                                                  |
|----------|-------|--------|----------|----------|--------|---------------|----------------------------------------------------------------------------------------------------------------------------------------------------------------------------------------------------------------------------------------------------------------------------------------------------------------------------------|
| 10393898 | 0.675 | 8.226  | 8.98E-06 | 2.07E-03 | 4.152  | Myadml2       | myeloid-associated differentiation marker-like 2                                                                                                                                                                                                                                                                                 |
| 10489569 | 0.675 | 9.003  | 1.84E-03 | 3.91E-02 | -1.234 | Pltp          | phospholipid transfer protein                                                                                                                                                                                                                                                                                                    |
| 10377782 | 0.674 | 5.542  | 9.08E-04 | 2.62E-02 | -0.507 | Clec10a       | macrophage galactose N-acetyl-galactosamine specific lectin 1                                                                                                                                                                                                                                                                    |
| 10435617 | 0.674 | 8.359  | 7.89E-05 | 6.44E-03 | 1.99   | Rabl3         | RAB, member of RAS oncogene family-like 3                                                                                                                                                                                                                                                                                        |
|          |       |        |          |          |        |               | predicted gene 13910; similar to Hydroxyacyl-Coenzyme A dehydrogenase/3-ketoacyl-Coenzyme A thiolase/enoyl-Coenzyme A hydratase (trifunctional protein), beta subunit; hydroxyacyl-Coenzyme A dehydrogenase/3-ketoacyl-Coenzyme A thiolase/enoyl-Coenzyme A hydratase (trifunctional protein), beta subunit; predicted gene 9108 |
| 10520467 | 0.673 | 12.089 | 1.03E-05 | 2.22E-03 | 4.014  | Hadhb         | chemokine (C-C motif) ligand 11                                                                                                                                                                                                                                                                                                  |
| 10379524 | 0.672 | 6.082  | 2.31E-03 | 4.44E-02 | -1.466 | Ccl11         | cardiotrophin 1                                                                                                                                                                                                                                                                                                                  |
| 10557738 | 0.672 | 6.847  | 1.07E-04 | 7.57E-03 | 1.678  | Ctf1          | trafficking protein particle complex 4                                                                                                                                                                                                                                                                                           |
| 10343934 | 0.671 | 7.456  | 2.05E-03 | 4.16E-02 | -1.346 | Trappc4       | RIKEN cDNA 4430402I18Rik                                                                                                                                                                                                                                                                                                         |
| 10466903 | 0.668 | 6.97   | 5.33E-05 | 5.13E-03 | 2.385  | 4430402I18Rik | RIKEN cDNA 4930485B16 gene                                                                                                                                                                                                                                                                                                       |
| 10371916 | 0.667 | 5.818  | 1.51E-05 | 2.67E-03 | 3.643  | 4930485B16Rik | expressed sequence AI464131                                                                                                                                                                                                                                                                                                      |
| 10512251 | 0.667 | 6.744  | 8.23E-04 | 2.49E-02 | -0.406 | AI464131      | lipin 1                                                                                                                                                                                                                                                                                                                          |
| 10399478 | 0.667 | 9.827  | 3.04E-05 | 3.82E-03 | 2.949  | Lpin1         | phosphodiesterase 8B                                                                                                                                                                                                                                                                                                             |
| 10411171 | 0.667 | 5.698  | 5.01E-05 | 4.89E-03 | 2.449  | Pde8b         | RIKEN cDNA 4932438A13Rik                                                                                                                                                                                                                                                                                                         |
| 10491611 | 0.666 | 8.209  | 9.01E-04 | 2.61E-02 | -0.499 | 4932438A13Rik | predicted gene 11710; predicted gene, OTTMUSG00000003606                                                                                                                                                                                                                                                                         |
| 10392834 | 0.666 | 8.284  | 8.61E-05 | 6.69E-03 | 1.902  | Clm3          | heterogeneous nuclear ribonucleoprotein H3                                                                                                                                                                                                                                                                                       |
| 10369704 | 0.666 | 9.215  | 3.61E-04 | 1.53E-02 | 0.44   | HnrnpH3       | proliferating cell nuclear antigen; similar to proliferating cell nuclear antigen (DNA polymerase delta auxiliary protein)                                                                                                                                                                                                       |
| 10461391 | 0.666 | 9.651  | 2.76E-03 | 4.95E-02 | -1.649 | Pcna          | synuclein, gamma                                                                                                                                                                                                                                                                                                                 |
| 10418921 | 0.666 | 7.374  | 2.70E-03 | 4.88E-02 | -1.626 | Sncg          | TCF3 (E2A) fusion partner                                                                                                                                                                                                                                                                                                        |
| 10559406 | 0.666 | 8.479  | 1.63E-05 | 2.72E-03 | 3.569  | Tfpt          | transmembrane 4 superfamily member 5                                                                                                                                                                                                                                                                                             |
| 10377841 | 0.666 | 6.078  | 5.95E-04 | 2.04E-02 | -0.072 | Tm4sf5        | enoyl Coenzyme A hydratase, short chain, 1, mitochondrial                                                                                                                                                                                                                                                                        |
| 10568939 | 0.665 | 11.692 | 9.68E-05 | 7.13E-03 | 1.783  | Echs1         | adaptor-related protein complex AP-1, mu subunit 1                                                                                                                                                                                                                                                                               |
| 10572786 | 0.664 | 9.791  | 1.21E-04 | 8.06E-03 | 1.557  | Ap1m1         | hydroxyacyl-Coenzyme A dehydrogenase/3-ketoacyl-Coenzyme A thiolase/enoyl-Coenzyme A hydratase (trifunctional protein), alpha subunit                                                                                                                                                                                            |
| 10528929 | 0.663 | 12.211 | 1.54E-05 | 2.67E-03 | 3.623  | Hadha         | solute carrier family 25 (mitochondrial carrier, glutamate), member 22                                                                                                                                                                                                                                                           |
| 10569168 | 0.663 | 7.401  | 2.85E-05 | 3.70E-03 | 3.014  | Slc25a22      | mitochondrial GTPase 1 homolog (S. cerevisiae)                                                                                                                                                                                                                                                                                   |
| 10558600 | 0.662 | 6.852  | 2.20E-04 | 1.13E-02 | 0.945  | Mtg1          | pleckstrin homology domain containing, family A member 7                                                                                                                                                                                                                                                                         |
| 10567134 | 0.662 | 6.77   | 3.46E-05 | 3.99E-03 | 2.82   | Plekha7       | tissue factor pathway inhibitor                                                                                                                                                                                                                                                                                                  |
| 10484389 | 0.662 | 10.292 | 2.31E-04 | 1.15E-02 | 0.898  | Tfpi          | Purkinje cell protein 4; immunoglobulin superfamily, member 5                                                                                                                                                                                                                                                                    |
| 10437205 | 0.661 | 6.222  | 2.05E-06 | 1.05E-03 | 5.561  | Pcp4          | absent in melanoma 1                                                                                                                                                                                                                                                                                                             |
| 10368947 | 0.66  | 5.49   | 6.45E-05 | 5.77E-03 | 2.193  | Aim1          | stathmin-like 2                                                                                                                                                                                                                                                                                                                  |
| 10490818 | 0.66  | 7.68   | 5.66E-05 | 5.30E-03 | 2.326  | Stmn2         | ectonucleoside triphosphate diphosphohydrolase 6                                                                                                                                                                                                                                                                                 |
| 10476952 | 0.659 | 7.59   | 2.03E-06 | 1.05E-03 | 5.572  | Entpd6        | RIKEN cDNA 2310076L09 gene                                                                                                                                                                                                                                                                                                       |
| 10451943 | 0.659 | 8.485  | 1.26E-04 | 8.21E-03 | 1.518  | Plin5         | angiopoietin-like 4                                                                                                                                                                                                                                                                                                              |
| 10450038 | 0.658 | 6.096  | 1.17E-03 | 3.00E-02 | -0.766 | Angptl4       | carbonic anhydrase 8; similar to Carbonic anhydrase-related protein (CARP) (CA-VIII)                                                                                                                                                                                                                                             |
| 10511429 | 0.657 | 7.864  | 1.30E-03 | 3.20E-02 | -0.878 | Car8          | solute carrier family 35, member F1                                                                                                                                                                                                                                                                                              |
| 10363146 | 0.657 | 5.623  | 4.87E-05 | 4.82E-03 | 2.477  | Slc35f1       |                                                                                                                                                                                                                                                                                                                                  |

|          |       |        |          |          |        |               |                                                                                                                                                                                                                                                                                                                                                          |
|----------|-------|--------|----------|----------|--------|---------------|----------------------------------------------------------------------------------------------------------------------------------------------------------------------------------------------------------------------------------------------------------------------------------------------------------------------------------------------------------|
| 10408074 | 0.656 | 6.68   | 3.63E-04 | 1.53E-02 | 0.435  | Hist1h4m      | histone cluster 1, H4k; histone cluster 1, H4m; histone cluster 4, H4; similar to germinal histone H4 gene; histone cluster 1, H4h; histone cluster 1, H4j; histone cluster 1, H4i; histone cluster 1, H4d; histone cluster 1, H4c; histone cluster 1, H4f; histone cluster 1, H4b; histone cluster 1, H4a; histone cluster 2, H4; similar to histone H4 |
| 10415742 | 0.656 | 9.503  | 3.91E-06 | 1.41E-03 | 4.954  | Mipep         | mitochondrial intermediate peptidase; similar to Mipep protein                                                                                                                                                                                                                                                                                           |
| 10384725 | 0.656 | 8.926  | 1.43E-03 | 3.40E-02 | -0.976 | Rel           | reticuloendotheliosis oncogene                                                                                                                                                                                                                                                                                                                           |
| 10466087 | 0.656 | 9.9    | 1.91E-05 | 2.96E-03 | 3.41   | Tmem109       | transmembrane protein 109                                                                                                                                                                                                                                                                                                                                |
| 10385353 | 0.654 | 8.244  | 3.32E-05 | 3.93E-03 | 2.86   | Adra1b        | adrenergic receptor, alpha 1b                                                                                                                                                                                                                                                                                                                            |
| 10401473 | 0.654 | 10.495 | 2.87E-06 | 1.23E-03 | 5.247  | Aldh6a1       | aldehyde dehydrogenase family 6, subfamily A1                                                                                                                                                                                                                                                                                                            |
| 10475502 | 0.654 | 6.567  | 2.07E-04 | 1.09E-02 | 1.012  | Gm14085       | similar to purine-selective Na <sup>+</sup> nucleoside cotransporter; novel protein similar to solute carrier family 28 (sodium-coupled nucleoside transporter) member 2 (Slc28a2)                                                                                                                                                                       |
| 10575867 | 0.654 | 8.102  | 2.12E-04 | 1.11E-02 | 0.984  | Mlycd         | malonyl-CoA decarboxylase                                                                                                                                                                                                                                                                                                                                |
| 10449741 | 0.654 | 9.396  | 2.53E-03 | 4.72E-02 | -1.562 | Sik1          | salt inducible kinase 1                                                                                                                                                                                                                                                                                                                                  |
| 10550638 | 0.653 | 9.561  | 5.93E-05 | 5.50E-03 | 2.279  | Rtn2          | reticulon 2 (Z-band associated protein)                                                                                                                                                                                                                                                                                                                  |
| 10364030 | 0.652 | 6.955  | 3.00E-04 | 1.36E-02 | 0.631  | Adora2a       | adenosine A2a receptor                                                                                                                                                                                                                                                                                                                                   |
| 10449142 | 0.652 | 9.46   | 6.50E-04 | 2.16E-02 | -0.163 | Fam195a       | WD repeat domain 90                                                                                                                                                                                                                                                                                                                                      |
| 10373054 | 0.651 | 7.661  | 1.34E-03 | 3.26E-02 | -0.907 | Slc26a10      | solute carrier family 26, member 10                                                                                                                                                                                                                                                                                                                      |
| 10359826 | 0.651 | 10.464 | 4.47E-05 | 4.67E-03 | 2.562  | Uqcr11        | ubiquinol-cytochrome c reductase (6.4kD) subunit; similar to ubiquinol-cytochrome c reductase subunit                                                                                                                                                                                                                                                    |
| 10522666 | 0.65  | 9.623  | 1.73E-03 | 3.78E-02 | -1.172 | ---           | RIKEN cDNA 2310040G07 gene                                                                                                                                                                                                                                                                                                                               |
| 10536697 | 0.65  | 9.682  | 1.17E-03 | 3.00E-02 | -0.764 | Asb15         | ankyrin repeat and SOCS box-containing 15                                                                                                                                                                                                                                                                                                                |
| 10595480 | 0.648 | 10.161 | 2.14E-04 | 1.11E-02 | 0.978  | Me1           | predicted gene 7049; similar to NADP-dependent malic enzyme (NADP-ME) (Malic enzyme 1); malic enzyme 1, NADP(+)-dependent, cytosolic                                                                                                                                                                                                                     |
| 10513608 | 0.647 | 10.808 | 1.42E-05 | 2.62E-03 | 3.701  | Alad          | aminolevulinic acid, delta-, dehydratase                                                                                                                                                                                                                                                                                                                 |
| 10536324 | 0.647 | 6.523  | 2.38E-03 | 4.52E-02 | -1.499 | Asb4          | ankyrin repeat and SOCS box-containing 4                                                                                                                                                                                                                                                                                                                 |
| 10515201 | 0.646 | 8.139  | 1.23E-04 | 8.18E-03 | 1.537  | Cyp4b1        | predicted gene 12839; cytochrome P450, family 4, subfamily b, polypeptide 1                                                                                                                                                                                                                                                                              |
| 10339071 | 0.645 | 10.412 | 3.37E-05 | 3.94E-03 | 2.845  | Cox18         | COX18 cytochrome c oxidase assembly homolog (S. cerevisiae)                                                                                                                                                                                                                                                                                              |
| 10446763 | 0.645 | 11.21  | 3.43E-06 | 1.35E-03 | 5.077  | Lbh           | limb-bud and heart                                                                                                                                                                                                                                                                                                                                       |
| 10509577 | 0.645 | 6.5    | 1.17E-05 | 2.37E-03 | 3.892  | Pla2g2d       | phospholipase A2, group IID                                                                                                                                                                                                                                                                                                                              |
| 10447521 | 0.645 | 8.708  | 4.52E-04 | 1.75E-02 | 0.209  | Tfb1m         | transcription factor B1, mitochondrial                                                                                                                                                                                                                                                                                                                   |
| 10450103 | 0.644 | 9.019  | 1.08E-06 | 6.80E-04 | 6.159  | H2-Ke6        | H2-K region expressed gene 6                                                                                                                                                                                                                                                                                                                             |
| 10433403 | 0.644 | 9.038  | 5.99E-04 | 2.05E-02 | -0.08  | Rbfox1        | ataxin 2 binding protein 1                                                                                                                                                                                                                                                                                                                               |
| 10557439 | 0.643 | 7.722  | 2.36E-05 | 3.36E-03 | 3.201  | Ccdc101       | coiled-coil domain containing 101                                                                                                                                                                                                                                                                                                                        |
| 10584024 | 0.643 | 6.444  | 2.60E-05 | 3.53E-03 | 3.106  | Opcml         | opioid binding protein/cell adhesion molecule-like                                                                                                                                                                                                                                                                                                       |
| 10455647 | 0.643 | 7.445  | 1.12E-04 | 7.68E-03 | 1.636  | Tnfaip8       | tumor necrosis factor, alpha-induced protein 8                                                                                                                                                                                                                                                                                                           |
| 10491605 | 0.642 | 9.31   | 8.51E-05 | 6.68E-03 | 1.913  | 4932438A13Rik | RIKEN cDNA 4932438A13 gene                                                                                                                                                                                                                                                                                                                               |
| 10387768 | 0.642 | 10.444 | 1.78E-05 | 2.81E-03 | 3.482  | Acadvl        | acyl-Coenzyme A dehydrogenase, very long chain                                                                                                                                                                                                                                                                                                           |
| 10554789 | 0.642 | 9.183  | 7.15E-04 | 2.28E-02 | -0.261 | Ctsc          | cathepsin C                                                                                                                                                                                                                                                                                                                                              |
| 10447084 | 0.642 | 8.368  | 1.68E-04 | 9.55E-03 | 1.223  | Galm          | galactose mutarotase                                                                                                                                                                                                                                                                                                                                     |
| 10581069 | 0.642 | 6.824  | 2.80E-04 | 1.30E-02 | 0.699  | Gm9853        | ENSMUSG00000051554                                                                                                                                                                                                                                                                                                                                       |

|          |       |        |          |          |        |               |                                                                                                                                        |
|----------|-------|--------|----------|----------|--------|---------------|----------------------------------------------------------------------------------------------------------------------------------------|
| 10470959 | 0.641 | 9.617  | 1.47E-04 | 8.83E-03 | 1.36   | Phyhd1        | phytanoyl-CoA dioxygenase domain containing 1                                                                                          |
| 10469255 | 0.641 | 6.06   | 2.43E-05 | 3.41E-03 | 3.171  | Prkccq        | protein kinase C, theta                                                                                                                |
| 10493335 | 0.64  | 7.731  | 2.04E-03 | 4.14E-02 | -1.34  | 5830417I10Rik | RIKEN cDNA 5830417I10 gene; similar to GON-4-like protein (GON-4 homolog); similar to Dingo protein isoform 2                          |
| 10585233 | 0.639 | 8.347  | 3.71E-04 | 1.56E-02 | 0.411  | Alg9          | asparagine-linked glycosylation 9 homolog (yeast, alpha 1,2 mannosyltransferase)                                                       |
| 10390519 | 0.639 | 7.343  | 1.08E-04 | 7.57E-03 | 1.668  | Plxdc1        | plexin domain containing 1                                                                                                             |
| 10482030 | 0.639 | 9.904  | 1.46E-05 | 2.66E-03 | 3.674  | Stom          | stomatin                                                                                                                               |
| 10572928 | 0.638 | 5.987  | 3.13E-04 | 1.40E-02 | 0.587  | Rasd2         | RASD family, member 2                                                                                                                  |
| 10464586 | 0.637 | 9.009  | 1.08E-04 | 7.57E-03 | 1.673  | Gstp2         | glutathione S-transferase, pi 2; glutathione S-transferase, pi 1; similar to glutathione S-transferase pi class A; predicted gene 3934 |
| 10519497 | 0.637 | 8.361  | 6.72E-04 | 2.19E-02 | -0.198 | Steap4        | STEAP family member 4                                                                                                                  |
| 10565775 | 0.635 | 11.04  | 1.19E-04 | 3.03E-02 | -0.786 | Dgat2         | diacylglycerol O-acyltransferase 2                                                                                                     |
| 10530371 | 0.635 | 10.167 | 3.34E-05 | 3.93E-03 | 2.855  | Yip7          | Yip1 domain family, member 7                                                                                                           |
| 10397148 | 0.634 | 5.528  | 1.84E-05 | 2.89E-03 | 3.449  | Acot1         | acyl-CoA thioesterase 1                                                                                                                |
| 10461459 | 0.633 | 7.095  | 4.73E-06 | 1.48E-03 | 4.771  | Syt7          | synaptotagmin VII                                                                                                                      |
| 10579996 | 0.632 | 12.022 | 2.37E-06 | 1.07E-03 | 5.428  | Tecr          | predicted gene 4948; glycoprotein, synaptic 2; RIKEN cDNA 1600014K23 gene                                                              |
| 10552919 | 0.631 | 10.259 | 1.70E-06 | 9.61E-04 | 5.737  | Hrc           | histidine rich calcium binding protein                                                                                                 |
| 10409265 | 0.63  | 10.005 | 7.73E-06 | 1.92E-03 | 4.298  | Auh           | AU RNA binding protein/enoyl-coenzyme A hydratase                                                                                      |
| 10426081 | 0.63  | 6.081  | 1.09E-04 | 7.57E-03 | 1.668  | Fam19a5       | family with sequence similarity 19, member A5                                                                                          |
| 10600502 | 0.629 | 8.951  | 3.01E-04 | 1.37E-02 | 0.626  | 2810453I06Rik | predicted gene 12579; RIKEN cDNA 2810453I06 gene; hypothetical LOC674122; predicted gene 6036                                          |
| 10352448 | 0.627 | 7.676  | 9.12E-04 | 2.63E-02 | -0.511 | Dusp10        | dual specificity phosphatase 10                                                                                                        |
| 10394990 | 0.627 | 8.311  | 1.58E-04 | 9.25E-03 | 1.283  | Mboat2        | membrane bound O-acyltransferase domain containing 2                                                                                   |
| 10415651 | 0.626 | 7.314  | 5.18E-06 | 1.54E-03 | 4.685  | Fgf9          | fibroblast growth factor 9                                                                                                             |
| 10533504 | 0.626 | 7.875  | 2.33E-04 | 1.16E-02 | 0.889  | Ift81         | intraflagellar transport 81 homolog (Chlamydomonas)                                                                                    |
| 10422585 | 0.624 | 5.52   | 1.72E-04 | 9.73E-03 | 1.198  | Fgf14         | fibroblast growth factor 14                                                                                                            |
| 10580233 | 0.624 | 9.306  | 2.37E-05 | 3.36E-03 | 3.197  | Gcdh          | glutaryl-Coenzyme A dehydrogenase                                                                                                      |
| 10494023 | 0.624 | 8.477  | 3.29E-05 | 3.93E-03 | 2.87   | Rorc          | RAR-related orphan receptor gamma                                                                                                      |
| 10377662 | 0.624 | 7.511  | 4.41E-06 | 1.44E-03 | 4.837  | Ybx2          | similar to Y box protein 2; Y box protein 2                                                                                            |
| 10514933 | 0.622 | 10.96  | 1.66E-06 | 9.60E-04 | 5.76   | Cpt2          | carnitine palmitoyltransferase 2                                                                                                       |
| 10449575 | 0.622 | 7.549  | 2.30E-03 | 4.44E-02 | -1.461 | Ppil1         | similar to peptidylprolyl isomerase-like 1; peptidylprolyl isomerase (cyclophilin)-like 1                                              |
| 10589368 | 0.62  | 7.87   | 1.72E-05 | 2.78E-03 | 3.517  | Plxnb1        | plexin B1                                                                                                                              |
| 10399973 | 0.62  | 8.97   | 1.90E-04 | 1.03E-02 | 1.096  | Hdac9         | histone deacetylase 9                                                                                                                  |
| 10459768 | 0.619 | 9.479  | 1.85E-04 | 1.01E-02 | 1.125  | ---           | ENSMUSG00000077346; ENSMUSG00000077335; ENSMUSG00000077754                                                                             |
| 10338615 | 0.619 | 6.739  | 2.60E-04 | 1.25E-02 | 0.777  | Tbl3          | transducin (beta)-like 3                                                                                                               |
| 10422962 | 0.618 | 8.806  | 1.66E-05 | 2.74E-03 | 3.549  | 1110020G09Rik | RIKEN cDNA 1110020G09 gene                                                                                                             |
| 10419416 | 0.618 | 6.159  | 7.79E-04 | 2.41E-02 | -0.35  | 3632451O06Rik | RIKEN cDNA 3632451O06 gene                                                                                                             |
| 10563085 | 0.618 | 10.339 | 2.90E-04 | 1.33E-02 | 0.664  | Fcgrt         | Fc receptor, IgG, alpha chain transporter                                                                                              |
| 10572647 | 0.618 | 10.543 | 2.50E-03 | 4.66E-02 | -1.546 | Slc27a1       | solute carrier family 27 (fatty acid transporter), member 1                                                                            |



|          |       |        |          |          |        |               |                                                                                         |
|----------|-------|--------|----------|----------|--------|---------------|-----------------------------------------------------------------------------------------|
| 10370833 | 0.617 | 11.282 | 1.04E-04 | 7.41E-03 | 1.712  | Uqcr11        | ubiquinol-cytochrome c reductase (6.4kD) subunit; similar to                            |
| 10413932 | 0.616 | 8.263  | 2.23E-03 | 4.33E-02 | -1.429 | E130203B14Rik | ubiquinol-cytochrome c reductase subunit                                                |
| 10461038 | 0.615 | 8.347  | 3.51E-06 | 1.35E-03 | 5.055  | MacroD1       | RIKEN cDNA E130203B14 gene                                                              |
| 10506415 | 0.615 | 8.415  | 3.16E-05 | 3.84E-03 | 2.91   | Oma1          | MACRO domain containing 1                                                               |
| 10556487 | 0.614 | 5.281  | 2.25E-04 | 1.14E-02 | 0.924  | ---           | OMA1 homolog, zinc metallopeptidase ( <i>S. cerevisiae</i> )                            |
| 10536611 | 0.614 | 9.364  | 2.15E-06 | 1.07E-03 | 5.519  | Kcnd2         | RIKEN cDNA A630005I04 gene                                                              |
| 10456699 | 0.613 | 12.815 | 4.49E-05 | 4.67E-03 | 2.56   | Acaa2         | potassium voltage-gated channel, Shal-related family, member 2                          |
| 10608715 | 0.61  | 10.518 | 8.07E-05 | 6.46E-03 | 1.968  | C1orf170      | acetyl-Coenzyme A acyltransferase 2 (mitochondrial 3-oxoacyl-Coenzyme A thiolase)       |
| 10608709 | 0.61  | 8.158  | 2.72E-03 | 4.91E-02 | -1.635 | Nkain1        | RIKEN cDNA 2310042D19 gene                                                              |
| 10387821 | 0.609 | 6.453  | 3.79E-04 | 1.57E-02 | 0.39   | Alox12        | Na <sup>+</sup> /K <sup>+</sup> transporting ATPase interacting 1                       |
| 10434516 | 0.608 | 7.405  | 1.91E-04 | 1.04E-02 | 1.089  | Fam131a       | arachidonate 12-lipoxygenase                                                            |
| 10513945 | 0.604 | 8.243  | 4.75E-05 | 4.79E-03 | 2.502  | 2310002L09Rik | family with sequence similarity 131, member A                                           |
| 10525989 | 0.604 | 7.61   | 1.51E-04 | 9.04E-03 | 1.329  | Gpr133        | RIKEN cDNA 2310002L09 gene                                                              |
| 10416023 | 0.604 | 6.621  | 1.47E-04 | 8.84E-03 | 1.357  | Scara5        | G protein-coupled receptor 133                                                          |
| 10475487 | 0.604 | 7.367  | 6.28E-05 | 5.71E-03 | 2.222  | Slc28a2       | scavenger receptor class A, member 5 (putative)                                         |
| 10552668 | 0.603 | 9.122  | 6.64E-04 | 2.17E-02 | -0.185 | Lrrc4b        | solute carrier family 28 (sodium-coupled nucleoside transporter), member 2              |
| 10355456 | 0.603 | 7.714  | 1.34E-05 | 2.57E-03 | 3.76   | Mreg          | leucine rich repeat containing 4B; similar to Leucine rich repeat containing 4B         |
| 10441718 | 0.603 | 8.093  | 6.11E-04 | 2.06E-02 | -0.1   | Park2         | melanoregulin                                                                           |
| 10363860 | 0.602 | 7.404  | 3.13E-04 | 1.40E-02 | 0.585  | Slc16a9       | Parkinson disease (autosomal recessive, juvenile) 2, parkin                             |
| 10555460 | 0.601 | 9.08   | 8.91E-04 | 2.59E-02 | -0.488 | Stard10       | solute carrier family 16 (monocarboxylic acid transporters), member 9                   |
| 10523547 | 0.6   | 7.284  | 1.50E-05 | 2.67E-03 | 3.65   | Agpat9        | START domain containing 10                                                              |
| 10476886 | 0.599 | 6.255  | 4.31E-04 | 1.70E-02 | 0.259  | Sstr4         | 1-acylglycerol-3-phosphate O-acyltransferase 9                                          |
| 10490384 | 0.598 | 7.994  | 4.02E-06 | 1.41E-03 | 4.926  | Lama5         | somatostatin receptor 4                                                                 |
| 10475866 | 0.596 | 6.884  | 8.63E-04 | 2.56E-02 | -0.456 | Bcl2l11       | laminin, alpha 5                                                                        |
| 10452404 | 0.595 | 8.319  | 2.90E-06 | 1.23E-03 | 5.237  | Nudt12        | BCL2-like 11 (apoptosis facilitator)                                                    |
| 10454683 | 0.595 | 5.733  | 3.98E-04 | 1.62E-02 | 0.339  | Pkd2l2        | nudix (nucleoside diphosphate linked moiety X)-type motif 12                            |
| 10350159 | 0.594 | 5.835  | 5.05E-04 | 1.84E-02 | 0.096  | Lad1          | polycystic kidney disease 2-like 2                                                      |
| 10578222 | 0.593 | 8.894  | 2.68E-04 | 1.27E-02 | 0.746  | Dlc1          | ladinin                                                                                 |
| 10552857 | 0.592 | 6.664  | 1.13E-03 | 2.95E-02 | -0.731 | Slc17a7       | deleted in liver cancer 1                                                               |
| 10460285 | 0.591 | 8.955  | 2.18E-06 | 1.07E-03 | 5.507  | Nudt8         | solute carrier family 17 (sodium-dependent inorganic phosphate cotransporter), member 7 |
| 10463361 | 0.591 | 6.163  | 9.83E-05 | 7.19E-03 | 1.767  | Scd4          | nudix (nucleoside diphosphate linked moiety X)-type motif 8                             |
| 10530100 | 0.589 | 7.244  | 1.83E-04 | 1.01E-02 | 1.136  | Arap2         | stearoyl-coenzyme A desaturase 4                                                        |
| 10412231 | 0.589 | 7.733  | 1.28E-04 | 8.31E-03 | 1.496  | Hspb3         | predicted gene 336; ArfGAP with RhoGAP domain, ankyrin repeat and PH domain 2           |
| 10351430 | 0.589 | 10.385 | 2.36E-04 | 1.17E-02 | 0.877  | Rxrg          | heat shock protein 3                                                                    |
| 10529515 | 0.589 | 7.386  | 4.53E-04 | 1.75E-02 | 0.207  | Sorcs2        | retinoid X receptor gamma                                                               |
| 10446771 | 0.588 | 11.299 | 1.13E-04 | 7.70E-03 | 1.63   | Lclat1        | soritin-related VPS10 domain containing receptor 2                                      |
| 10460556 | 0.586 | 8.302  | 4.87E-06 | 1.49E-03 | 4.743  | Gal3st3       | lysocardiolipin acyltransferase 1                                                       |
| 10500283 | 0.584 | 10.554 | 2.37E-06 | 1.07E-03 | 5.425  | Car14         | galactose-3-O-sulfotransferase 3                                                        |
|          |       |        |          |          |        |               | carbonic anhydrase 14                                                                   |

|          |       |        |          |          |        |               |                                                                                                                                                          |
|----------|-------|--------|----------|----------|--------|---------------|----------------------------------------------------------------------------------------------------------------------------------------------------------|
| 10434229 | 0.584 | 8.913  | 2.02E-03 | 4.12E-02 | -1.328 | Cldn5         | claudin 5                                                                                                                                                |
| 10578241 | 0.584 | 8.446  | 1.40E-05 | 2.61E-03 | 3.714  | Dlc1          | RIKEN cDNA A730069N07 gene                                                                                                                               |
| 10494551 | 0.582 | 9.038  | 2.71E-05 | 3.60E-03 | 3.063  | Acp6          | acid phosphatase 6, lysophosphatidic                                                                                                                     |
| 10511679 | 0.578 | 11.018 | 2.12E-05 | 3.17E-03 | 3.307  | Decr1         | 2,4-dienoyl CoA reductase 1, mitochondrial                                                                                                               |
| 10566457 | 0.576 | 7.411  | 1.03E-05 | 2.22E-03 | 4.02   | Apbb1         | amyloid beta (A4) precursor protein-binding, family B, member 1                                                                                          |
| 10420730 | 0.575 | 9.384  | 1.29E-06 | 7.71E-04 | 5.994  | Fdft1         | predicted gene 6781; farnesyl diphosphate farnesyl transferase 1 solute carrier family 25 (mitochondrial carnitine/acylcarnitine translocase), member 20 |
| 10589076 | 0.573 | 10.463 | 7.78E-06 | 1.92E-03 | 4.292  | Slc25a20      |                                                                                                                                                          |
| 10551614 | 0.572 | 11.971 | 3.16E-05 | 3.84E-03 | 2.91   | Ech1          | enoyl coenzyme A hydratase 1, peroxisomal                                                                                                                |
| 10539143 | 0.571 | 9.05   | 2.29E-04 | 1.15E-02 | 0.905  | Retsat        | retinol saturase (all trans retinol 13,14 reductase)                                                                                                     |
| 10600597 | 0.571 | 9.836  | 1.29E-04 | 8.31E-03 | 1.491  | Tmem47        | transmembrane protein 47                                                                                                                                 |
| 10586865 | 0.57  | 7.04   | 2.21E-03 | 4.32E-02 | -1.423 | Aldh1a2       | aldehyde dehydrogenase family 1, subfamily A2                                                                                                            |
| 10397145 | 0.567 | 11.761 | 1.13E-04 | 7.70E-03 | 1.627  | Acot2         | acyl-CoA thioesterase 2                                                                                                                                  |
| 10585851 | 0.567 | 6.841  | 2.60E-04 | 1.25E-02 | 0.775  | Hcn4          | hyperpolarization-activated, cyclic nucleotide-gated K+ 4                                                                                                |
| 10582322 | 0.567 | 5.441  | 1.03E-03 | 2.81E-02 | -0.64  | Snai3         | snail homolog 3 (Drosophila)                                                                                                                             |
| 10397440 | 0.565 | 7.36   | 2.13E-05 | 3.17E-03 | 3.302  | Esrrb         | estrogen related receptor, beta                                                                                                                          |
| 10467989 | 0.562 | 6.623  | 1.22E-04 | 8.13E-03 | 1.545  | Sec31b        | Sec31 homolog B (S. cerevisiae)                                                                                                                          |
| 10472155 | 0.558 | 8.807  | 3.08E-04 | 1.38E-02 | 0.602  | Kcnj3         | potassium inwardly-rectifying channel, subfamily J, member 3                                                                                             |
| 10354374 | 0.558 | 7.579  | 1.75E-06 | 9.61E-04 | 5.71   | Slc40a1       | solute carrier family 40 (iron-regulated transporter), member 1                                                                                          |
| 10385540 | 0.556 | 6.226  | 8.15E-04 | 2.48E-02 | -0.397 | Olfir1396     | olfactory receptor 1396                                                                                                                                  |
| 10345065 | 0.554 | 6.914  | 1.21E-03 | 3.06E-02 | -0.805 | Gsta3         | glutathione S-transferase, alpha 3                                                                                                                       |
| 10492330 | 0.553 | 8.505  | 3.89E-06 | 1.41E-03 | 4.958  | P2ry1         | purinergic receptor P2Y, G-protein coupled 1                                                                                                             |
| 10369806 | 0.551 | 9.123  | 1.16E-03 | 2.99E-02 | -0.758 | 1700040L02Rik | RIKEN cDNA 1700040L02 gene                                                                                                                               |
| 10361234 | 0.551 | 6.366  | 2.31E-06 | 1.07E-03 | 5.452  | Hsd11b1       | hydroxysteroid 11-beta dehydrogenase 1                                                                                                                   |
| 10520304 | 0.55  | 8.233  | 4.10E-05 | 4.44E-03 | 2.65   | Actr3b        | ARP3 actin-related protein 3 homolog B (yeast)                                                                                                           |
| 10537712 | 0.55  | 11.373 | 4.56E-05 | 4.69E-03 | 2.544  | Gstk1         | glutathione S-transferase kappa 1                                                                                                                        |
| 10491825 | 0.548 | 9.83   | 1.08E-05 | 2.24E-03 | 3.975  | 3110057O12Rik | RIKEN cDNA 3110057O12 gene; predicted gene 2011                                                                                                          |
| 10548038 | 0.548 | 7.658  | 9.00E-04 | 2.61E-02 | -0.498 | Ntf3          | neurotrophin 3                                                                                                                                           |
| 10442445 | 0.542 | 10.757 | 9.32E-06 | 2.12E-03 | 4.115  | Dci           | dodecenoyl-Coenzyme A delta isomerase (3,2 trans-enoyl-Coenzyme A isomerase)                                                                             |
| 10491820 | 0.542 | 8.871  | 3.44E-05 | 3.99E-03 | 2.826  | Gm2011        | RIKEN cDNA 3110057O12 gene; predicted gene 2011                                                                                                          |
| 10383813 | 0.536 | 9.456  | 4.56E-06 | 1.46E-03 | 4.805  | 1700020C11Rik | RIKEN cDNA 1700020C11 gene                                                                                                                               |
| 10497399 | 0.533 | 8.507  | 3.20E-05 | 3.87E-03 | 2.899  | Pde7a         | phosphodiesterase 7A                                                                                                                                     |
| 10412909 | 0.526 | 9.317  | 6.06E-06 | 1.66E-03 | 4.532  | Fdft1         | predicted gene 6781; farnesyl diphosphate farnesyl transferase 1                                                                                         |
| 10360745 | 0.525 | 8.544  | 3.70E-05 | 4.10E-03 | 2.753  | Lbr           | lamin B receptor                                                                                                                                         |
| 10435019 | 0.522 | 7.699  | 7.65E-05 | 6.34E-03 | 2.021  | 2310010M20Rik | RIKEN cDNA 2310010M20 gene                                                                                                                               |
| 10404376 | 0.52  | 9.428  | 2.05E-05 | 3.12E-03 | 3.34   | Agtr1a        | angiotensin II receptor, type 1a                                                                                                                         |
| 10583920 | 0.52  | 7.405  | 5.00E-04 | 1.83E-02 | 0.106  | Eepd1         | endonuclease/exonuclease/phosphatase family domain containing 1                                                                                          |
| 10506269 | 0.519 | 6.924  | 4.22E-06 | 1.43E-03 | 4.881  | Ak4           | predicted gene 13639; similar to adenylate kinase 4; adenylate kinase 3-like 1                                                                           |
| 10379866 | 0.519 | 9.298  | 6.36E-05 | 5.74E-03 | 2.209  | Car4          | carbonic anhydrase 4                                                                                                                                     |
| 10397346 | 0.518 | 6.121  | 4.50E-07 | 4.61E-04 | 6.94   | Fos           | FBJ osteosarcoma oncogene                                                                                                                                |
| 10547153 | 0.517 | 7.148  | 1.70E-05 | 2.78E-03 | 3.524  | Alox5         | arachidonate 5-lipoxygenase                                                                                                                              |

|          |       |        |          |          |        |               |                                                                                |
|----------|-------|--------|----------|----------|--------|---------------|--------------------------------------------------------------------------------|
| 10512145 | 0.517 | 10.247 | 7.58E-04 | 2.38E-02 | -0.322 | Aqp7          | aquaporin 7                                                                    |
| 10596718 | 0.516 | 9.415  | 1.52E-05 | 2.67E-03 | 3.635  | Slc38a3       | solute carrier family 38, member 3                                             |
| 10386020 | 0.515 | 8.098  | 5.34E-07 | 4.88E-04 | 6.79   | Slc36a2       | solute carrier family 36 (proton/amino acid symporter), member 2               |
| 10564805 | 0.513 | 7.588  | 3.07E-05 | 3.82E-03 | 2.939  | Pex11a        | peroxisomal biogenesis factor 11 alpha                                         |
| 10502105 | 0.508 | 6.428  | 2.48E-05 | 3.44E-03 | 3.15   | Egf           | epidermal growth factor                                                        |
| 10413381 | 0.506 | 9.89   | 1.55E-05 | 2.67E-03 | 3.619  | Asb14         | ankyrin repeat and SOCS box-containing 14                                      |
| 10355998 | 0.502 | 5.874  | 2.88E-04 | 1.32E-02 | 0.671  | Fam124b       | family with sequence similarity 124, member B                                  |
| 10584870 | 0.501 | 6.319  | 5.71E-04 | 1.99E-02 | -0.03  | Tmprss13      | transmembrane protease, serine 13                                              |
| 10357875 | 0.498 | 9.33   | 1.76E-04 | 9.89E-03 | 1.177  | Btg2          | B-cell translocation gene 2, anti-proliferative                                |
| 10456383 | 0.498 | 7.588  | 1.04E-06 | 6.68E-04 | 6.191  | Impa2         | inositol (myo)-1(or 4)-monophosphatase 2                                       |
| 10455299 | 0.497 | 9.573  | 3.65E-06 | 1.37E-03 | 5.017  | Sh3rf2        | SH3 domain containing ring finger 2                                            |
| 10387483 | 0.496 | 8.689  | 3.28E-05 | 3.93E-03 | 2.872  | Efnb3         | ephrin B3                                                                      |
| 10400304 | 0.496 | 10.292 | 1.14E-04 | 7.77E-03 | 1.613  | Egln3         | EGL nine homolog 3 (C. elegans)                                                |
| 10452648 | 0.493 | 7.984  | 1.68E-04 | 9.55E-03 | 1.224  | Emilin2       | elastin microfibril interfacier 2                                              |
| 10602385 | 0.49  | 6.052  | 2.56E-04 | 1.24E-02 | 0.792  | Pfkfb1        | 6-phosphofructo-2-kinase/fructose-2,6-biphosphatase 1                          |
| 10472923 | 0.488 | 9.462  | 2.53E-08 | 1.01E-04 | 9.293  | Ak4           | predicted gene 13639; similar to adenylate kinase 4; adenylate kinase 3-like 1 |
| 10461642 | 0.485 | 10.314 | 2.84E-05 | 3.70E-03 | 3.019  | Scarna17      | ENSMUSG00000077346; ENSMUSG00000077335; ENSMUSG00000077754                     |
| 10374777 | 0.481 | 7.575  | 7.82E-05 | 6.40E-03 | 1.999  | Efemp1        | epidermal growth factor-containing fibulin-like extracellular matrix protein 1 |
| 10398824 | 0.478 | 8.706  | 5.72E-05 | 5.33E-03 | 2.316  | A530016L24Rik | hypothetical protein LOC100047653; RIKEN cDNA A530016L24 gene                  |
| 10377774 | 0.471 | 7.383  | 3.03E-05 | 3.82E-03 | 2.952  | Mgl2          | macrophage galactose N-acetyl-galactosamine specific lectin 2                  |
| 10408543 | 0.469 | 10.339 | 2.17E-05 | 3.18E-03 | 3.286  | Mylk4         | myosin light chain kinase family, member 4                                     |
| 10350473 | 0.456 | 7.514  | 9.00E-07 | 6.26E-04 | 6.32   | B3galt2       | UDP-Gal:betaGlcNAc beta 1,3-galactosyltransferase, polypeptide 2               |
| 10454782 | 0.455 | 7.876  | 1.18E-03 | 3.02E-02 | -0.779 | Egr1          | early growth response 1                                                        |
| 10399892 | 0.455 | 8.262  | 2.55E-07 | 3.55E-04 | 7.435  | Gpr22         | G protein-coupled receptor 22                                                  |
| 10365769 | 0.446 | 6.757  | 1.56E-03 | 3.59E-02 | -1.065 | Hal           | histidine ammonia lyase                                                        |
| 10462303 | 0.439 | 6.524  | 1.26E-05 | 2.45E-03 | 3.823  | Kcnv2         | potassium channel, subfamily V, member 2                                       |
| 10581151 | 0.438 | 9.743  | 2.64E-03 | 4.83E-02 | -1.605 | Rrad          | Ras-related associated with diabetes                                           |
| 10402512 | 0.437 | 8.783  | 8.39E-07 | 6.08E-04 | 6.384  | Scarna13      | ENSMUSG00000077583; ENSMUSG00000077781                                         |
| 10581538 | 0.424 | 8.38   | 1.67E-05 | 2.74E-03 | 3.544  | Nqo1          | NAD(P)H dehydrogenase, quinone 1                                               |
| 10355893 | 0.417 | 8.318  | 9.77E-05 | 7.18E-03 | 1.773  | Epha4         | Eph receptor A4                                                                |
| 10502081 | 0.414 | 7.47   | 2.27E-06 | 1.07E-03 | 5.466  | Enpep         | glutamyl aminopeptidase                                                        |
| 10483000 | 0.413 | 8.639  | 1.08E-04 | 7.57E-03 | 1.671  | Itgb6         | integrin beta 6                                                                |
| 10427035 | 0.413 | 9.289  | 7.18E-04 | 2.29E-02 | -0.265 | Nr4a1         | nuclear receptor subfamily 4, group A, member 1                                |
| 10547227 | 0.406 | 6.564  | 5.00E-05 | 4.89E-03 | 2.451  | Ret           | ret proto-oncogene                                                             |
| 10428376 | 0.405 | 8.264  | 1.98E-04 | 1.06E-02 | 1.058  | Angpt1        | angiopoietin 1                                                                 |
| 10441794 | 0.404 | 8.325  | 6.82E-04 | 2.21E-02 | -0.214 | Mrgprh        | MAS-related GPR, member H                                                      |
| 10360406 | 0.401 | 7.596  | 1.37E-03 | 3.31E-02 | -0.929 | Ifi205        | interferon activated gene 205                                                  |
| 10413874 | 0.399 | 6.079  | 1.67E-03 | 3.70E-02 | -1.135 | Ogdhl         | oxoglutarate dehydrogenase-like                                                |
| 10571797 | 0.396 | 8.332  | 2.49E-07 | 3.55E-04 | 7.455  | Asb5          | ankyrin repeat and SOCs box-containing 5                                       |

|          |       |        |          |          |        |         |                                                                                                                                                |
|----------|-------|--------|----------|----------|--------|---------|------------------------------------------------------------------------------------------------------------------------------------------------|
| 10585068 | 0.394 | 6.536  | 1.44E-03 | 3.41E-02 | -0.98  | Fam55d  | family with sequence similarity 55, member D                                                                                                   |
| 10405179 | 0.387 | 8.938  | 4.92E-04 | 1.82E-02 | 0.122  | S1pr3   | sphingosine-1-phosphate receptor 3                                                                                                             |
| 10540059 | 0.361 | 9.485  | 8.51E-04 | 2.53E-02 | -0.441 | Slc41a3 | solute carrier family 41, member 3                                                                                                             |
| 10409999 | 0.357 | 6.461  | 2.62E-05 | 3.54E-03 | 3.099  | Fbp2    | fructose biphosphatase 2                                                                                                                       |
| 10447773 | 0.351 | 6.629  | 1.64E-07 | 2.97E-04 | 7.809  | Slc22a3 | solute carrier family 22 (organic cation transporter), member 3                                                                                |
| 10428619 | 0.349 | 6.879  | 2.43E-06 | 1.08E-03 | 5.403  | Enpp2   | ectonucleotide pyrophosphatase/phosphodiesterase 2<br>similar to NFIL3/E4BP4 transcription factor; nuclear factor,<br>interleukin 3, regulated |
| 10409278 | 0.349 | 7.12   | 7.85E-06 | 1.92E-03 | 4.283  | Nfil3   | interleukin 3, regulated                                                                                                                       |
| 10556463 | 0.346 | 6.444  | 6.04E-04 | 2.06E-02 | -0.088 | Arntl   | aryl hydrocarbon receptor nuclear translocator-like                                                                                            |
| 10413492 | 0.34  | 11.138 | 2.99E-07 | 3.58E-04 | 7.299  | Lrtm1   | leucine-rich repeats and transmembrane domains 1                                                                                               |
| 10494160 | 0.333 | 8.882  | 7.11E-07 | 5.81E-04 | 6.533  | Tmod4   | tropomodulin 4                                                                                                                                 |
| 10457038 | 0.332 | 7.528  | 3.63E-04 | 1.53E-02 | 0.435  | Gm10524 | ENSMUSG00000073519                                                                                                                             |
| 10442584 | 0.332 | 9.653  | 4.72E-06 | 1.48E-03 | 4.774  | Rpl3l   | ribosomal protein L3-like                                                                                                                      |
| 10416099 | 0.319 | 6.681  | 1.51E-05 | 2.67E-03 | 3.643  | Adra1a  | adrenergic receptor, alpha 1a                                                                                                                  |
| 10603746 | 0.307 | 9.254  | 5.50E-07 | 4.90E-04 | 6.762  | Maob    | monoamine oxidase B                                                                                                                            |
| 10580635 | 0.305 | 9.3    | 1.97E-05 | 3.01E-03 | 3.381  | Ces1d   | carboxylesterase 3                                                                                                                             |
| 10407707 | 0.289 | 8.411  | 4.41E-10 | 1.53E-05 | 11.832 | Gm10336 | ENSMUSG00000071543<br>phospholipase B domain containing 1; similar to RIKEN cDNA<br>1100001H23 gene                                            |
| 10548817 | 0.268 | 8.304  | 7.24E-07 | 5.81E-04 | 6.517  | Plbd1   | phospholipase B domain containing 1; similar to RIKEN cDNA<br>1100001H23 gene                                                                  |
| 10392152 | 0.254 | 6.546  | 2.71E-07 | 3.58E-04 | 7.381  | Scn4a   | sodium channel, voltage-gated, type IV, alpha                                                                                                  |
| 10492355 | 0.239 | 6.385  | 2.42E-08 | 1.01E-04 | 9.325  | Mme     | membrane metallo endopeptidase                                                                                                                 |
| 10409579 | 0.231 | 7.032  | 1.48E-06 | 8.71E-04 | 5.866  | Cxcl14  | chemokine (C-X-C motif) ligand 14                                                                                                              |
| 10511363 | 0.151 | 6.89   | 5.31E-07 | 4.88E-04 | 6.795  | Penk    | preproenkephalin                                                                                                                               |
| 10490913 | 0.141 | 6.4    | 5.39E-06 | 1.56E-03 | 4.645  | Car3    | carbonic anhydrase 3                                                                                                                           |
| 10436095 | 0.136 | 5.907  | 3.66E-06 | 1.37E-03 | 5.016  | Retnla  | resistin like alpha                                                                                                                            |
| 10462912 | 0.102 | 6.433  | 2.99E-07 | 3.58E-04 | 7.299  | Lgi1    | leucine-rich repeat LGI family, member 1; predicted gene 3888                                                                                  |

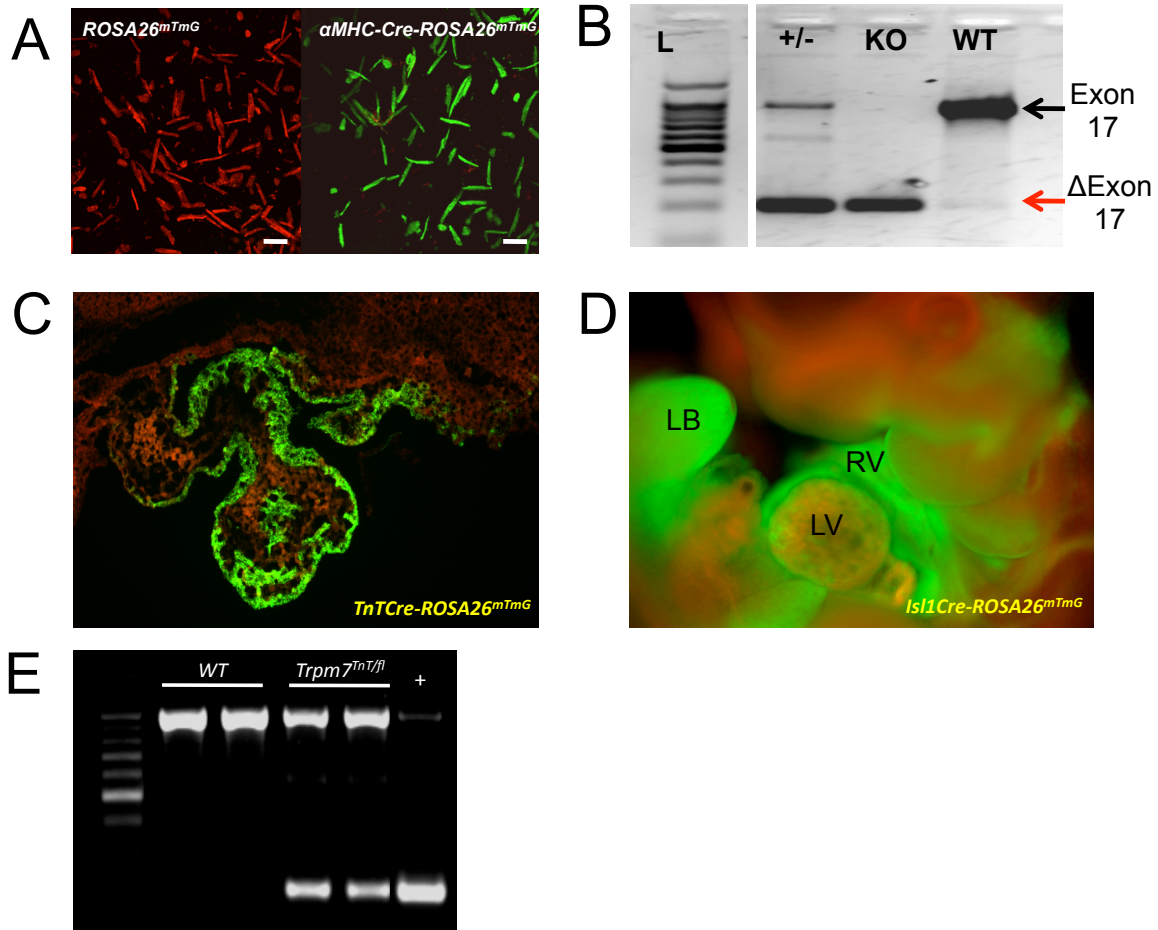

**Supplemental Figure 1. Cre-mediated recombination and *Trpm7* deletion by *TnT-Cre*/*Isl1-Cre* and *αMHC-Cre***

(A) Confocal images of isolated cardiomyocytes from *WT ROSA26<sup>mTmG</sup>* hearts and *αMHC-Cre-ROSA26<sup>mTmG</sup>* hearts. EGFP expressed in 100% of myocytes when *ROSA26<sup>mTmG</sup>* was crossed with *αMHC-Cre*, confirming *Cre* expression in all ventricular myocytes. Scale bars, 100  $\mu$ m. (B) PCR across exon 17 from genomic DNA isolated from P1 *Trpm7<sup>αMHC/fl</sup>* heart (KO), WT heart (WT) and from tail DNA of *Trpm7<sup>+/-</sup>* mouse (+/-). Deletion of exon 17 is present selectively in KO heart (200 bp amplicon, red arrow) as compared to WT heart (1 Kb amplicon, black arrow). (C) Fluorescence image of *TnT-Cre-ROSA26<sup>mTmG</sup>* heart at E9 shows cardiac-restricted *Cre* expression. (D) *Isl1-Cre-ROSA26<sup>mTmG</sup>* is predominantly restricted to the right ventricle (RV), but is also more widely expressed in the embryo (i.e. limb bud, LB). (E) Deletion of *Trpm7* exon 17 from genomic DNA of E9 *Trpm7<sup>TnT/fl</sup>* hearts compared to *Trpm7<sup>fl/fl</sup>* (WT) controls.

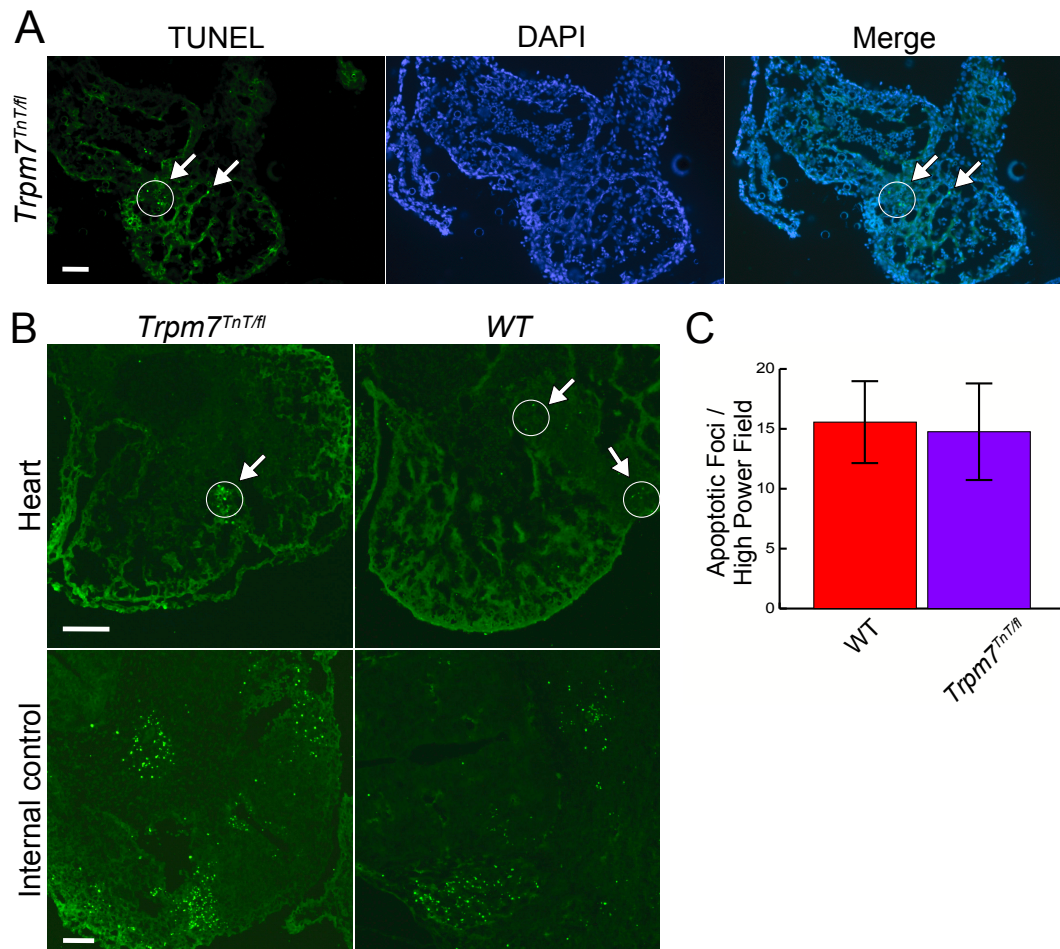

**Supplemental Figure 2. Apoptosis in the compact myocardium is unchanged in *Trpm7<sup>TnT/fl</sup>* mice.** A TUNEL-based cell assay was used to assess rates of apoptosis in the developing heart at E10. **(A)** TUNEL-based fluorescein labelling of *Trpm7<sup>TnT/fl</sup>* hearts shows nuclear localization (center panel, DAPI; right panel, merged image). **(B)** Distribution and density of apoptotic foci appears similar in control (*WT*) and *Trpm7<sup>TnT/fl</sup>* hearts; dense apoptosis was consistently observed in the rostral lateral plate, and paraxial mesoderm (**Internal control**). **(C)** Quantitative analysis demonstrates similar rates of apoptosis in *WT* and *Trpm7<sup>TnT/fl</sup>* hearts ( $P=0.87$ ). Scale bar, 100  $\mu\text{m}$ . Error bars represent SEM.

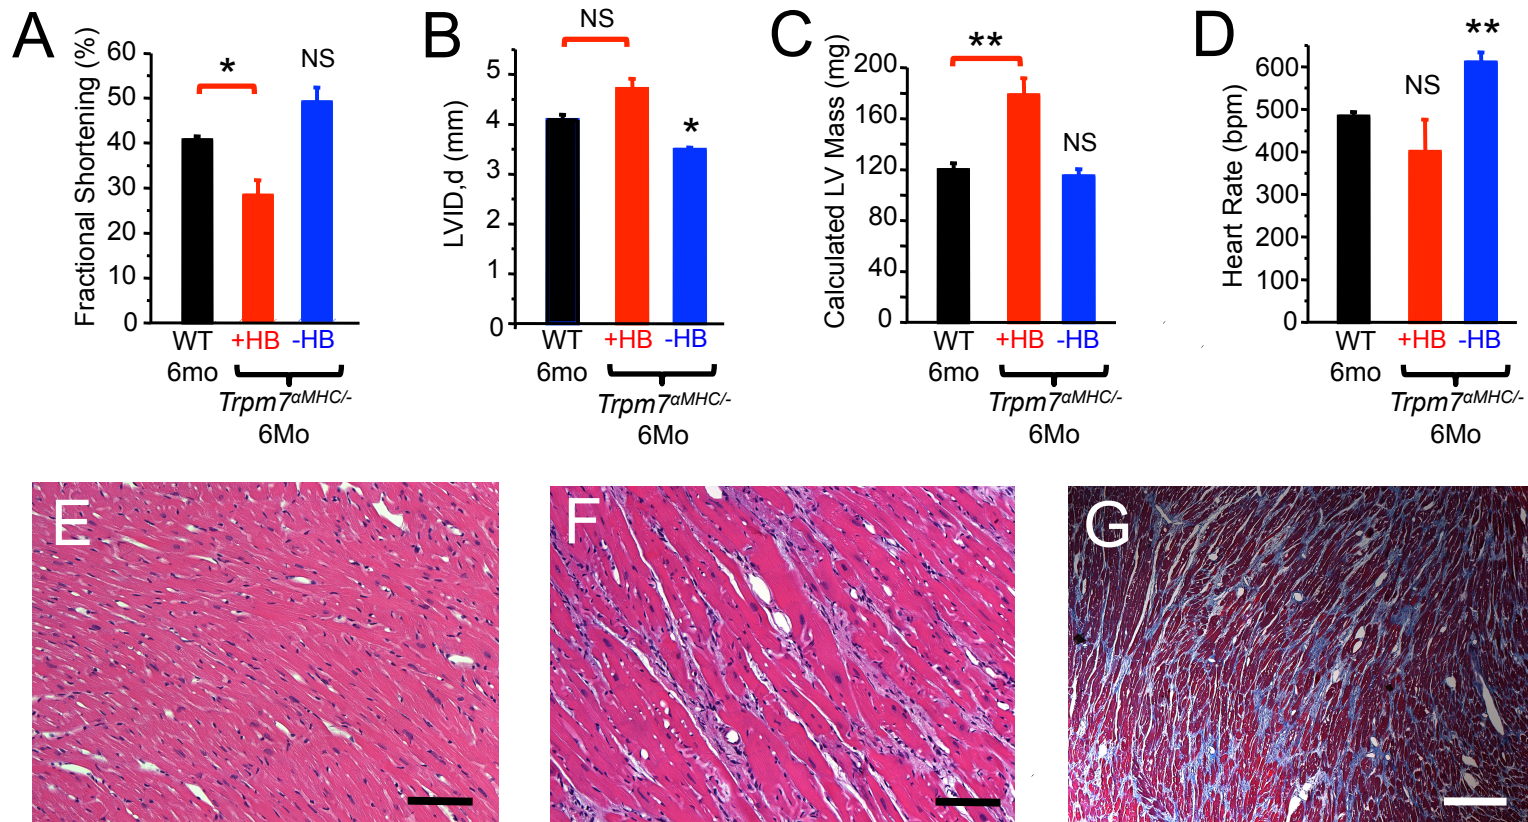

**Supplementary Figure 3. Functional assessment and histological examination of ventricular tissue from 6 month old *Trpm7<sup>αMHC</sup>/-* mice**

(A) Fractional shortening, (B) Left ventricular internal dimension (LVID), (C) Calculated left ventricular mass, (D) Heart rate in WT (black bar, n = 13), *Trpm7<sup>αMHC</sup>/-* with heart block (+HB, red bar, n = 3) and without heart block (-HB, blue bar, n = 5). Hematoxylin-eosin stain of 6 month-old WT (E) compared with *Trpm7<sup>αMHC</sup>/-* ventricular myocardium (F) shows myocyte enlargement and interstitial extracellular matrix deposition in the latter. Scale bar, 100 μm. (G) Masson-Trichrome stain shows diffuse interstitial fibrosis (blue stain) in *Trpm7<sup>αMHC</sup>/-* myocardium consistent with extensive collagen deposition. Scale bar, 400 μm. \* p < 0.05, \*\* p < 0.01.

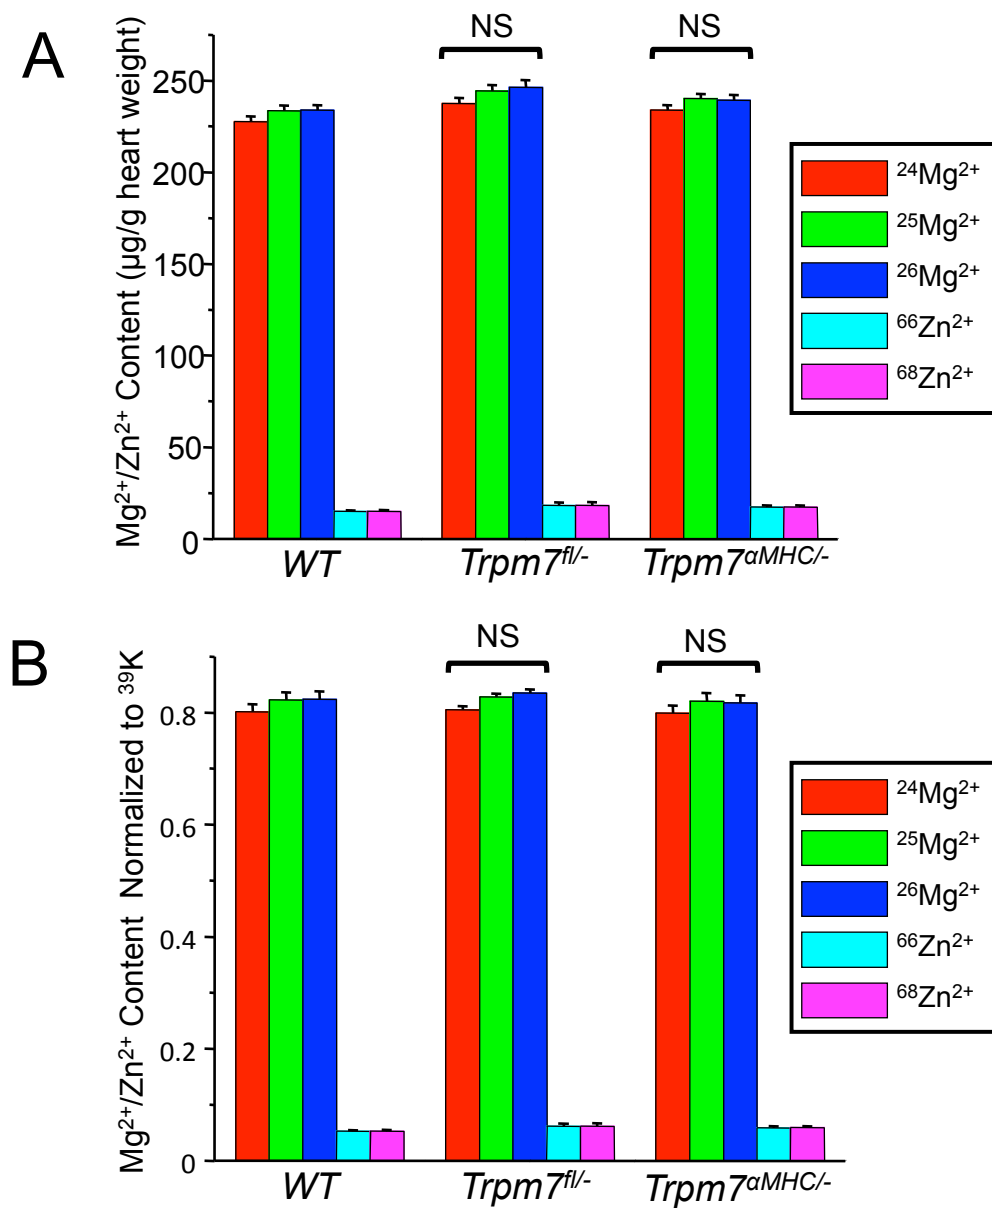

**Supplemental Figure 4. Total myocardial magnesium and zinc content is unchanged in *Trpm7<sup>αMHC/-</sup>* hearts**

Total myocardial levels of isotopes <sup>24</sup>Mg<sup>2+</sup>, <sup>25</sup>Mg<sup>2+</sup>, <sup>26</sup>Mg<sup>2+</sup>, <sup>66</sup>Zn<sup>2+</sup> and <sup>68</sup>Zn<sup>2+</sup> in *WT*, *Trpm7<sup>fl/-</sup>* and *Trpm7<sup>αMHC/-</sup>* myocardium per gram heart (A) and normalized to total <sup>39</sup>K (B), measured by Inductively Coupled Plasma Mass Spectrometry (ICP-MS). NS, not statistically significant compared to *WT*.



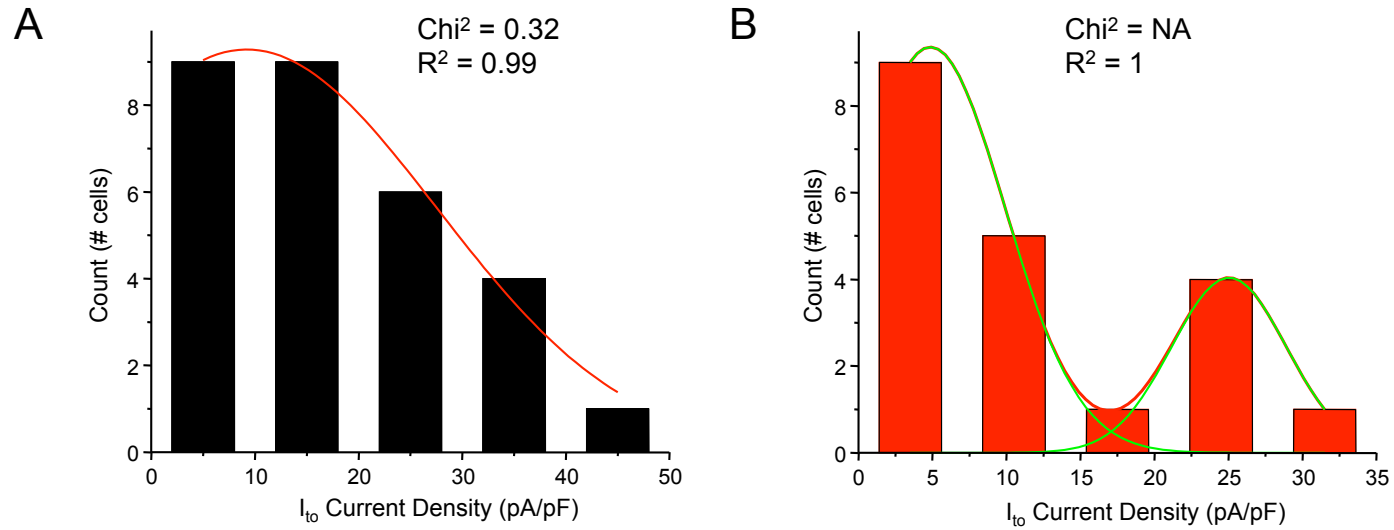

**Supplemental Figure 5. Distribution of I<sub>to</sub> current density in WT and *Trpm7*<sup>αMHC/-</sup> -HB myocytes**

(A) I<sub>to</sub> current density distribution in cardiomyocytes from WT left ventricle is best fit to a single gaussian distribution. (B) I<sub>to</sub> current density distribution from *Trpm7*<sup>αMHC/-</sup> -HB left ventricle is best fit to by two gaussian distributions suggesting the presence of a mosaic consisting of two populations of cells.

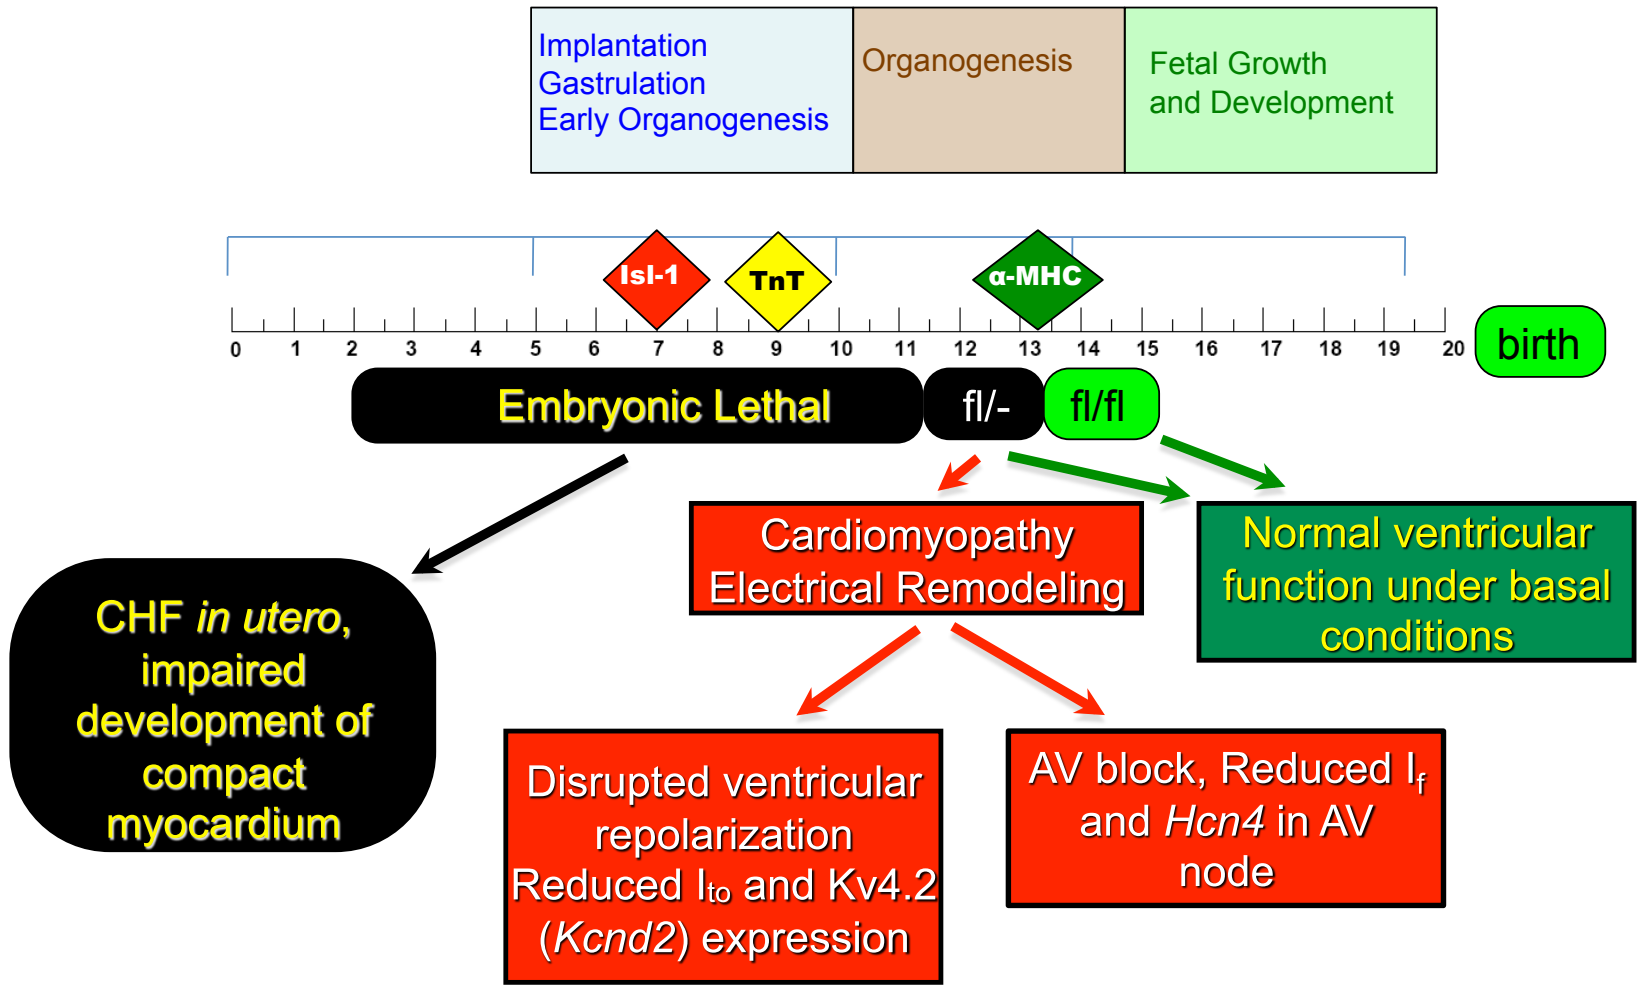

Supplemental Figure 6. Cardiac phenotypes depend on timing of *Trpm7* deletion during myocardial development

## Videos

### **Movie 1. 2D transthoracic echocardiogram of *Trpm7* <sup>$\alpha$ MHC/-</sup> mouse with heart block**

Severely impaired left-ventricular (LV) systolic function; the left ventricle is dilated. The green tracing (below) shows the simultaneously recorded ECG demonstrating high-grade atrioventricular block. Yellow trace (below) shows respirophasic changes in respiratory impedance. Heart rate in green (right) reflects QRS complex per minute (BPM). Respiration rate (RR) is shown in yellow.

### **Movie 2. Severe biventricular dysfunction in cardiac-targeted *Trpm7* <sup>$\alpha$ MHC/-</sup> mouse with heart block**

Severe biventricular dilation and dysfunction in a *Trpm7* <sup>$\alpha$ MHC/-</sup> +HB mouse. The simultaneously recorded ECG (green trace) shows high-grade atrioventricular block. Respirophasic changes (yellow trace) reports respiratory impedance. Heart rate in green (right) is calculated from the number of QRS complexes per minute (BPM). Respiration rate (RR) is shown in yellow.

### **Movie 3. 2D transthoracic echocardiogram of cardiac-targeted *Trpm7* <sup>$\alpha$ MHC/-</sup> mouse without heart block**

Normal LV size and function in *Trpm7* <sup>$\alpha$ MHC/-</sup> -HB mice. The simultaneously recorded ECG (green trace) is a normal sinus rhythm. Respirophasic changes in respiratory impedance are in yellow. Heart rate in green (right) is calculated from the number of QRS complexes per minute (BPM). Respiration rate (RR) is shown in yellow.
